# Supplementary material for: A highly diastereoselective (5+1) annulation of allenoates and pyrazolones catalyzed by CH3OK
Source: Royal Society of Chemistry journal article supplement (doi:10.1039/d3cc05751h), 2024-01-01
Supplement: d3cc05751h1.pdf [file d3cc05751h1.pdf]

## Supporting Information

### **A Highly Diastereoselective (5+1) Annulation of Allenates and Pyrazolones Catalyzed by CH<sub>3</sub>OK**

Jingxiong Lai<sup>†</sup>, You Huang<sup>\*,†</sup>

<sup>†</sup>State Key Laboratory and Institute of Elemento-Organic Chemistry, College of Chemistry,  
Nankai University, Tianjin 300071, China

Email: [hyou@nankai.edu.cn](mailto:hyou@nankai.edu.cn)

## Table of Contents

|                                                                     |    |
|---------------------------------------------------------------------|----|
| 1. General Information.....                                         | 1  |
| 2. General Procedure of Starting Material .....                     | 2  |
| 3. Optimization of Reaction Conditions .....                        | 3  |
| 4. Scale-up Experiment and Transformations of the New Product ..... | 4  |
| 5. Mechanism Investigation.....                                     | 4  |
| 6. Characterization Data of New Substrates .....                    | 10 |
| 7. Spectra.....                                                     | 23 |
| 8. X-Ray Crystallography Data of 3ar .....                          | 52 |
| 9. References.....                                                  | 58 |

## 1. General Information

Commercial reagents and solvents were used as received without further purification, unless otherwise stated. Unless otherwise specified, reactions at 60 °C have been performed using the pre-heated water-bath or the pre-heated oil-bath maintained at 60 °C. Yields referred to isolated compounds through preparative TLC. <sup>1</sup>H NMR, <sup>13</sup>C NMR spectra were recorded on a Bruker Avance 400 (400 MHz) spectrometer. And <sup>19</sup>F NMR were reported on a Bruker Avance (376 MHz) spectrometer. Chemical shifts for protons are reported in ppm and are referenced to the NMR solvent peak (CDCl<sub>3</sub>: δ 7.26 ppm, D). Chemical shifts for carbons are reported in ppm and are referenced to the carbon resonances of the NMR solvent peak (CDCl<sub>3</sub>: δ 77.06 ppm). Multiplicity was indicated as follows: s (singlet), d (doublet), t (triplet), q (quartet), dd (doublet of doublet), brs (broad singlet) and m (multiplet). High resolution mass spectrometry (HRMS) obtained on Q Exactive Focus or Agilent 6520 Q-TOF LC/MS with ESI resource. Melting points were measured on a RY-I apparatus and reported uncorrected.

## 2. General Procedure of Starting Material

### 2.1. The substrates examined in this report.

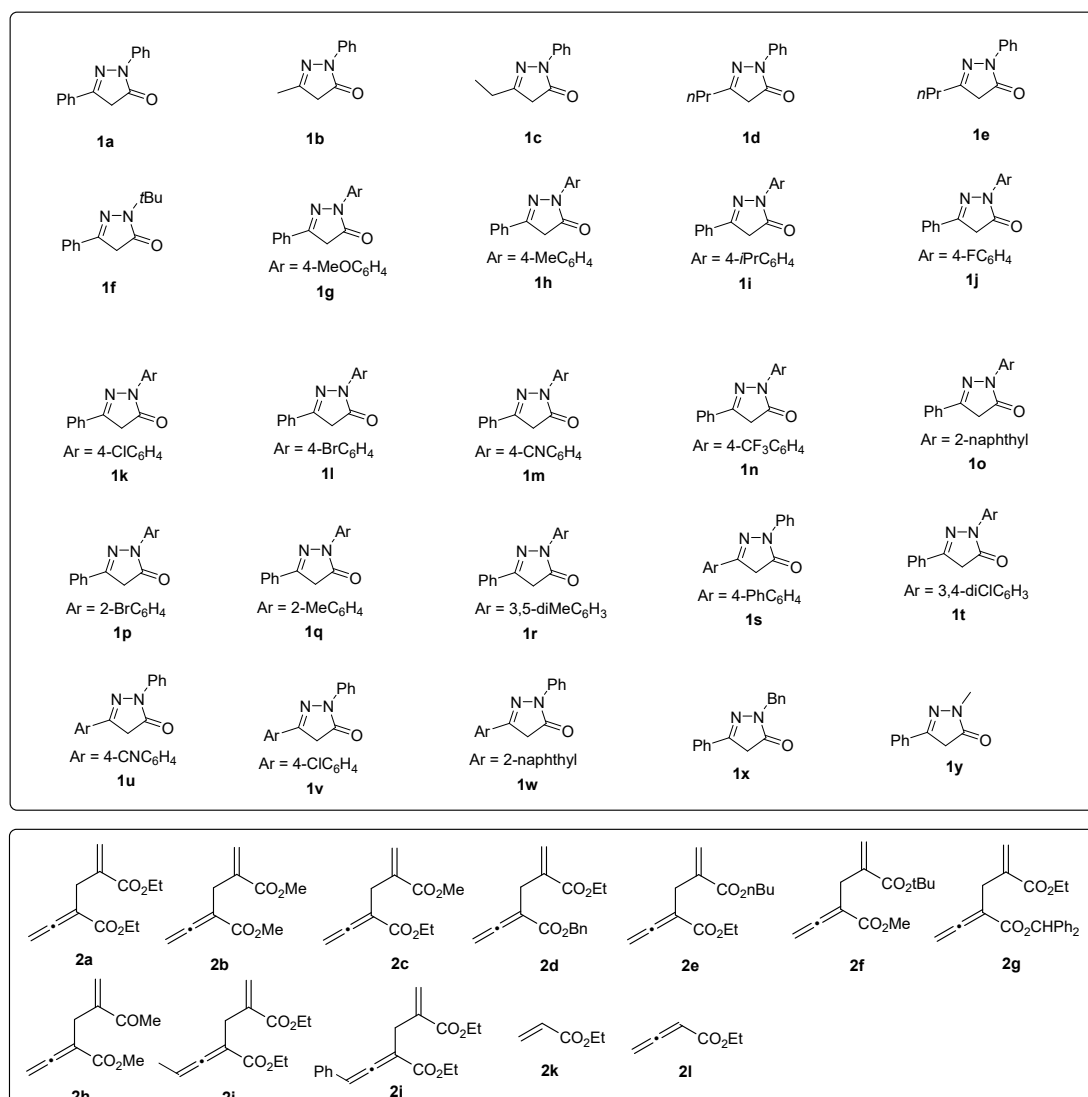

All pyrazolone substrates were prepared according to reported literature procedures.<sup>[1]</sup> The  $\alpha$ -activated-allylic substituted allenoates were prepared following the synthetic method according to our reported literature procedures.<sup>[2]</sup>

### 3. Optimization of Reaction Conditions

**Table S1.** Optimization of reaction conditions.<sup>a</sup>

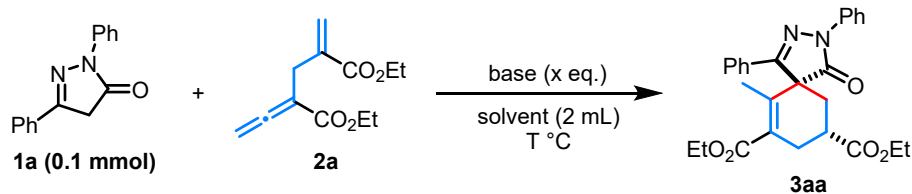

| entry | 1a:2a | cat.                                                       | solvent             | T/°C | time/h | yield/% <sup>[a]</sup> |
|-------|-------|------------------------------------------------------------|---------------------|------|--------|------------------------|
| 1     | 1:2   | CH <sub>3</sub> OK (1.2 eq)                                | DCM                 | 25   | 24     | 44                     |
| 2     | 1:2   | Cs <sub>2</sub> CO <sub>3</sub> (1.2 eq)                   | DCM                 | 25   | 24     | -                      |
| 3     | 1:2   | tBuOK (1.2 eq)                                             | DCM                 | 25   | 24     | 20                     |
| 4     | 1:2   | DABCO (1.2 eq)                                             | DCM                 | 25   | 24     | -                      |
| 5     | 1:2   | K <sub>3</sub> PO <sub>4</sub> ·3H <sub>2</sub> O (1.2 eq) | DCM                 | 25   | 24     | 30                     |
| 6     | 1:2   | CH <sub>3</sub> OK (1.2 eq)                                | CHCl <sub>3</sub>   | 25   | 24     | 50                     |
| 7     | 1:2   | CH <sub>3</sub> OK (1.2 eq)                                | toluene             | 25   | 24     | 40                     |
| 8     | 1:2   | CH <sub>3</sub> OK (1.2 eq)                                | Et <sub>2</sub> O   | 25   | 24     | 30                     |
| 9     | 1:2   | CH <sub>3</sub> OK (1.2 eq)                                | ClPh                | 25   | 24     | 43                     |
| 10    | 1:2   | CH <sub>3</sub> OK (1.2 eq)                                | CH <sub>3</sub> OPh | 25   | 24     | 49                     |
| 11    | 1:2   | CH <sub>3</sub> OK (0.2 eq)                                | CHCl <sub>3</sub>   | 25   | 24     | 47                     |
| 12    | 1:2   | CH <sub>3</sub> OK (0.2 eq)                                | CHCl <sub>3</sub>   | 60   | 4      | 87                     |
| 13    | 1:1   | CH <sub>3</sub> OK (0.2 eq)                                | CHCl <sub>3</sub>   | 60   | 4      | 74                     |
| 14    | 1.2:1 | CH <sub>3</sub> OK (0.2 eq)                                | CHCl <sub>3</sub>   | 60   | 4      | 48                     |
| 15    | 1:2   | -                                                          | CHCl <sub>3</sub>   | 60   | 24     | -                      |

General reaction conditions: <sup>a</sup>**1a** (0.10 mmol), **2a** (0.2 mmol) and base (1.2 equiv.) in solvent (2 mL) at 25 °C. Dr values (>20:1) were determined by <sup>1</sup>H NMR analysis. Isolated yield.

General Procedure of new products

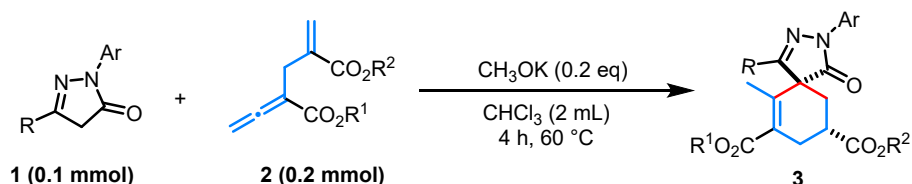

Under 60 °C heated by oil bath, to a solution of pyrazolone (0.1 mmol) and allenolate (0.2 mmol) in CHCl<sub>3</sub> (2 mL) was added CH<sub>3</sub>OK (20 mol%). The resulting mixture was stirred for 4 hours until the complete consumption of the starting materials monitored by TLC. After removal of CHCl<sub>3</sub>, the residue was diluted with ethyl acetate (2.0 mL) and washed with brine. The volatile was removed under reduced pressure and the residue was purified by preparative TLC (petroleum ether: ethyl acetate = 5:1) to afford desired products.

#### 4. Scale-up Experiment and Transformations of the New Product 3aa.

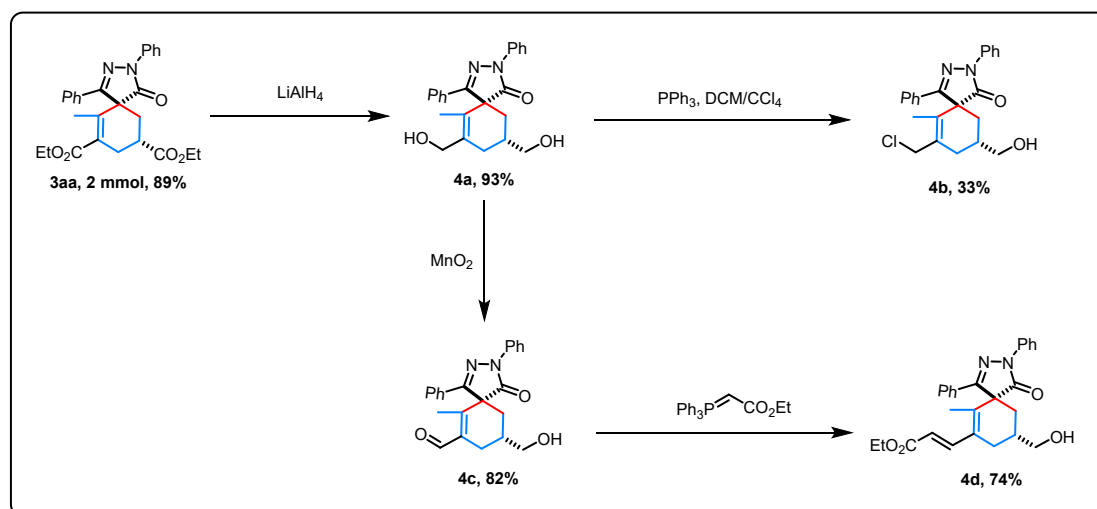

#### Scale-up Experiment (3aa)

Under 60 °C heated by oil bath, to a solution of pyrazolone (2 mmol) and allenolate (4 mmol) in CHCl<sub>3</sub> (40 mL) was added CH<sub>3</sub>OK (20 mol%). The resulting mixture was stirred for 4 hours until the complete consumption of the starting materials monitored by TLC. After removal of CHCl<sub>3</sub>, the residue was diluted with ethyl acetate (20.0 mL) and washed with brine. The volatile was removed under reduced pressure and the residue was purified by column chromatography (petroleum ether: ethyl acetate = 5:1) to afford desired products (0.82 g, 89% yield).

#### LiAlH<sub>4</sub> Reduction of 3aa

An oven-dried 25-mL round bottom flask with a stir bar was charged with of **3aa** (0.10 mmol, 1.0 equiv.), LiAlH<sub>4</sub> (0.25 mmol, 3.0 equiv.) in 4mL of anhydrous THF. Then the reaction mixture was stirred at room temperature for 10 mins under argon atmosphere. When the reaction was complete detected by TLC, the resulting reaction mixture was quenched by adding water (10 μL), 15% aqueous NaOH (20 μL), and water (10 μL) again. Then the suspension was filtered, washed with ethyl acetate, and the combined filtrates were concentrated under reduced pressure. The residue was purified through column chromatography on silica gel (petroleum ether/ethyl acetate = 1:1) to afford the desired products **4a** (35.1 mg, 93% yield) as white solid (melting point 120-123°C).

**<sup>1</sup>H NMR (400 MHz, CDCl<sub>3</sub>)** δ 7.76 (d, *J* = 7.1 Hz, 2H), 7.34 (ddd, *J* = 19.0, 15.7, 8.2 Hz, 7H), 6.93 (t, *J* = 7.2 Hz, 1H), 4.97 (s, 1H), 4.29 (dd, *J* = 16.4, 7.6 Hz, 2H), 4.15 (d, *J* = 11.9 Hz, 1H), 3.22 (dd, *J* = 11.6, 4.6 Hz, 1H), 2.50 (d, *J* = 16.5 Hz, 2H), 2.09 (d, *J* = 17.4 Hz, 1H), 1.99 (dd, *J* = 12.5, 3.4 Hz, 1H), 1.93 (d, *J* = 11.2 Hz, 1H), 1.65 (s, 4H).

**<sup>13</sup>C NMR (101 MHz, CDCl<sub>3</sub>)** δ 151.68, 144.77, 133.43, 131.93, 131.16, 129.01, 128.74, 128.56, 125.93, 120.67, 114.02, 96.86, 66.69, 62.63, 54.81, 33.38, 25.65, 25.16, 15.32.

**HRMS (ESI):** *m/z* calcd for C<sub>23</sub>H<sub>24</sub>N<sub>2</sub>O<sub>3</sub>Na ([M+Na]<sup>+</sup>): 399.1679; found: 399.1679.

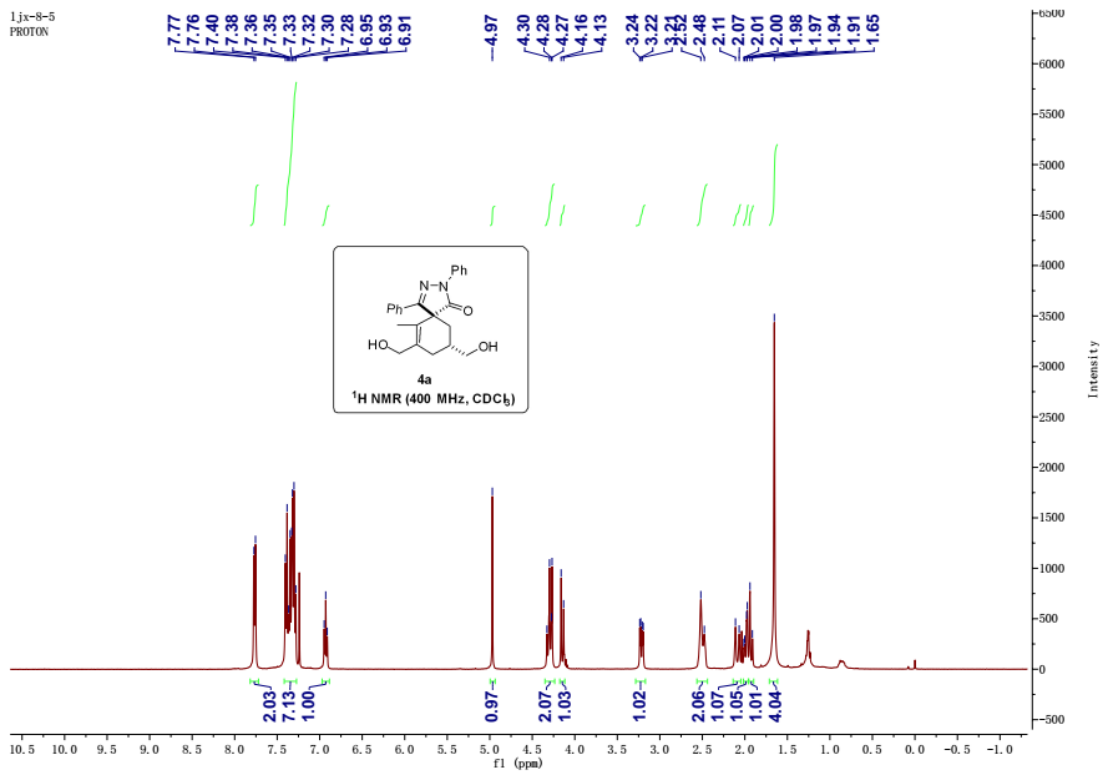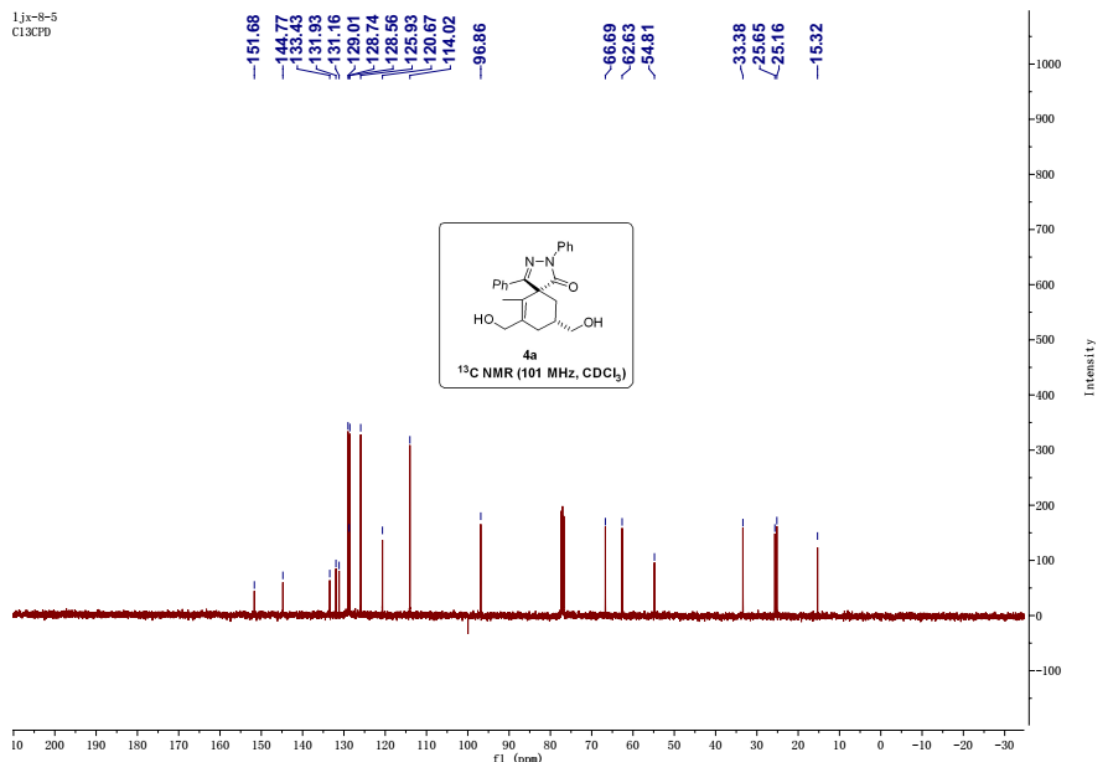

### Appel Reaction of **4a**

A solution of **4a** (0.1 mmol, 1.0 equiv.) and carbon tetrachloride (10.4 mmol, 104.0 equiv.) in anhydrous dichloromethane (6 mL) was stirred in an oven-dried 25-mL round bottom flask and cooled to 0 °C. Triphenyl phosphine (0.15 mmol, 1.5 equiv.) was added and the reaction mixture was stirred at room

temperature for 12 h. When the reaction was complete detected by TLC, the resulting reaction mixture was directly purified by chromatography on a silica gel column (30 -120 mesh) using 4:1 petroleum ether-ethyl acetate solvent mixture as eluent to afford desired product **4b** (13 mg, 33% yield) as yellow oil.

**<sup>1</sup>H NMR (400 MHz, CDCl<sub>3</sub>)** δ 7.77 – 7.72 (m, 2H), 7.35 (ddd, *J* = 19.1, 13.5, 8.2 Hz, 7H), 6.94 (t, *J* = 7.2 Hz, 1H), 4.97 (s, 1H), 4.33 (dd, *J* = 11.6, 9.3 Hz, 1H), 4.26 (d, *J* = 10.9 Hz, 1H), 4.03 (d, *J* = 11.0 Hz, 1H), 3.21 (dd, *J* = 11.7, 5.0 Hz, 1H), 2.61 – 2.46 (m, 2H), 2.11 (d, *J* = 16.8 Hz, 1H), 2.02 (dd, *J* = 13.0, 3.8 Hz, 1H), 1.93 (dd, *J* = 12.3, 1.7 Hz, 1H), 1.72 (s, 3H).

**<sup>13</sup>C NMR (101 MHz, CDCl<sub>3</sub>)** δ 151.11, 144.63, 136.92, 131.76, 129.05, 128.81, 128.63, 128.49, 125.94, 120.77, 114.02, 96.62, 66.27, 55.14, 44.93, 33.85, 25.49, 25.12, 15.60.

**HRMS (ESI):** *m/z* calcd for C<sub>23</sub>H<sub>24</sub>ClN<sub>2</sub>O ([M-OH+2H]<sup>+</sup>): 379.1572; found: 379.1573.

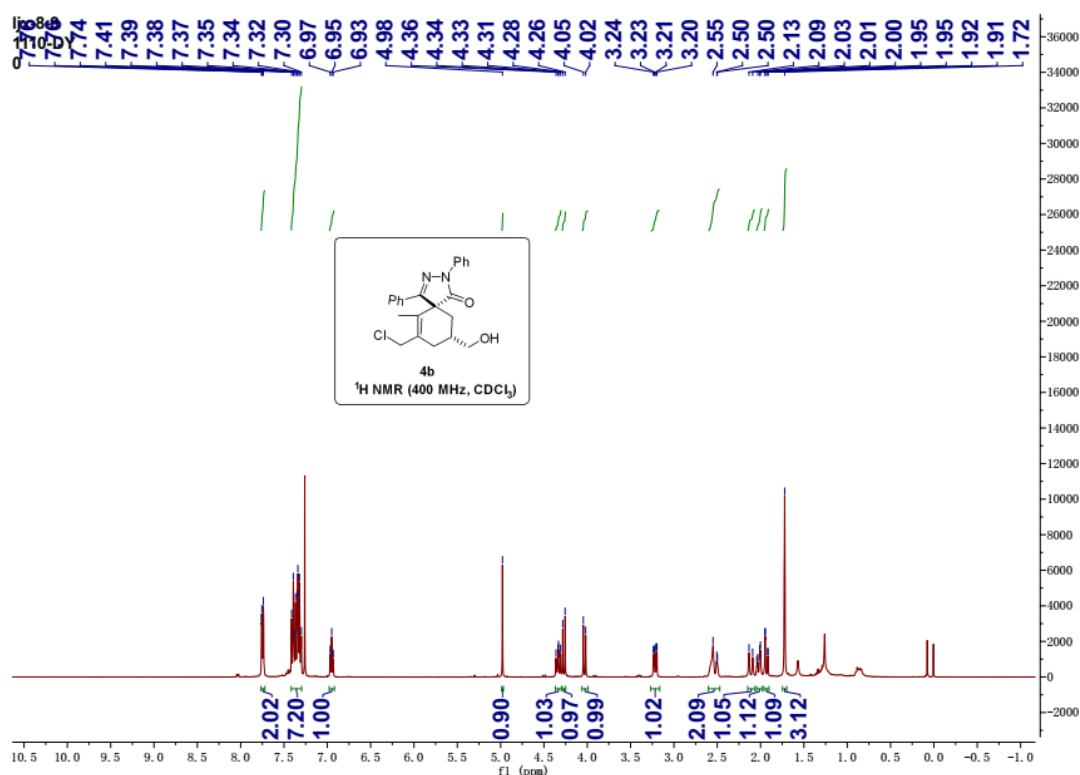



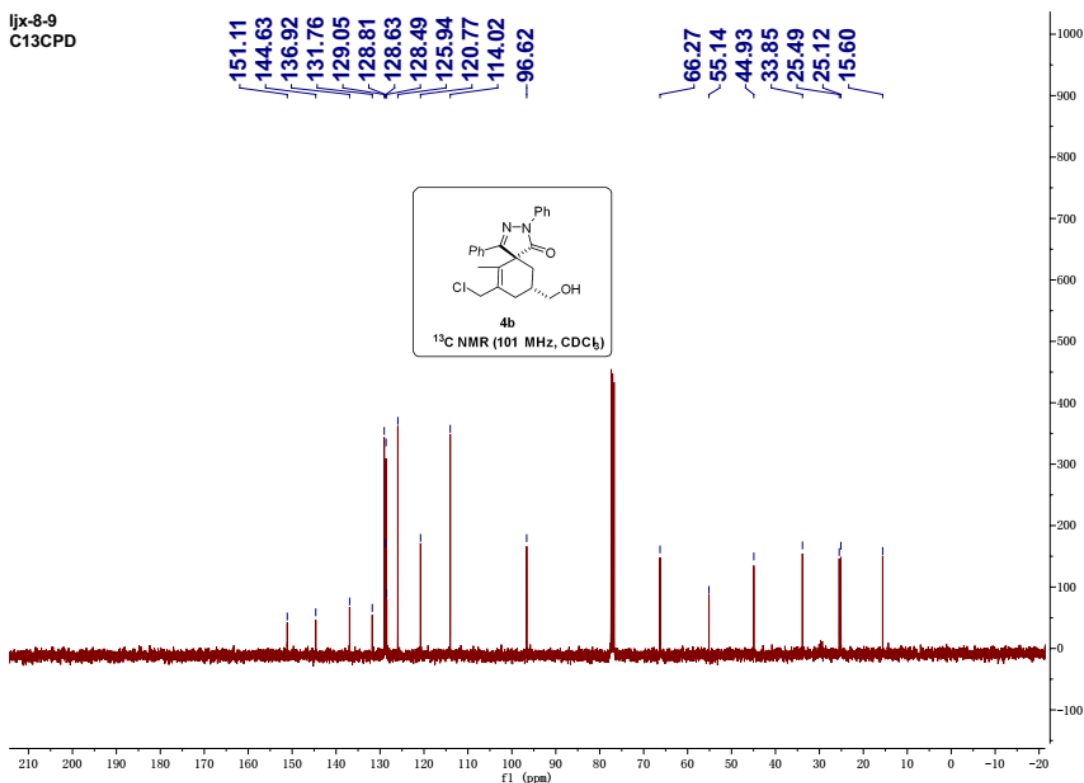

### MnO<sub>2</sub> Oxidized of **4a**

A mixture of **4a** (0.10 mmol, 1.0 equiv.), MnO<sub>2</sub> (2.1 mmol, 21.0 equiv.) was stirred in ethyl acetate (3.0 mL) was heated at 85°C for 3h in oil bath in a 10 mL pressure resistant reaction tube. When the reaction was complete detected by TLC, the reaction mixture was filtered through silica gel and the solid residue was washed with ethyl acetate and the solvent was removed under reduced pressure. Finally, the crude product was purified by chromatography on a silica gel column (30 -120 mesh) using 4:1 petroleum ether-ethyl acetate solvent mixture as eluent to afford **4c** (30.5 mg, 82% yield) as white solid (melted point 142-144°C).

**<sup>1</sup>H NMR (400 MHz, CDCl<sub>3</sub>)** δ 10.25 (s, 1H), 7.73 – 7.68 (m, 2H), 7.41 – 7.30 (m, 7H), 6.97 (t, *J* = 7.2 Hz, 1H), 5.04 (s, 1H), 4.34 (dd, *J* = 11.7, 9.0 Hz, 1H), 3.15 (dd, *J* = 11.8, 4.8 Hz, 1H), 2.61 (s, 1H), 2.46 (ddd, *J* = 18.6, 4.9, 2.3 Hz, 1H), 2.35 (d, *J* = 17.7 Hz, 1H), 2.13 (s, 3H), 2.09 (dd, *J* = 13.0, 4.0 Hz, 1H), 1.96 (dd, *J* = 12.5, 2.1 Hz, 1H).

**<sup>13</sup>C NMR (101 MHz, CDCl<sub>3</sub>)** δ 191.19, 155.72, 150.07, 144.33, 133.09, 131.29, 129.11, 128.82, 125.88, 121.16, 114.18, 96.68, 66.79, 56.37, 28.72, 25.15, 24.28, 15.01.

**HRMS (ESI):** *m/z* calcd for C<sub>23</sub>H<sub>23</sub>N<sub>2</sub>O<sub>3</sub> ([M+H]<sup>+</sup>): 375.1703; found: 375.1702.

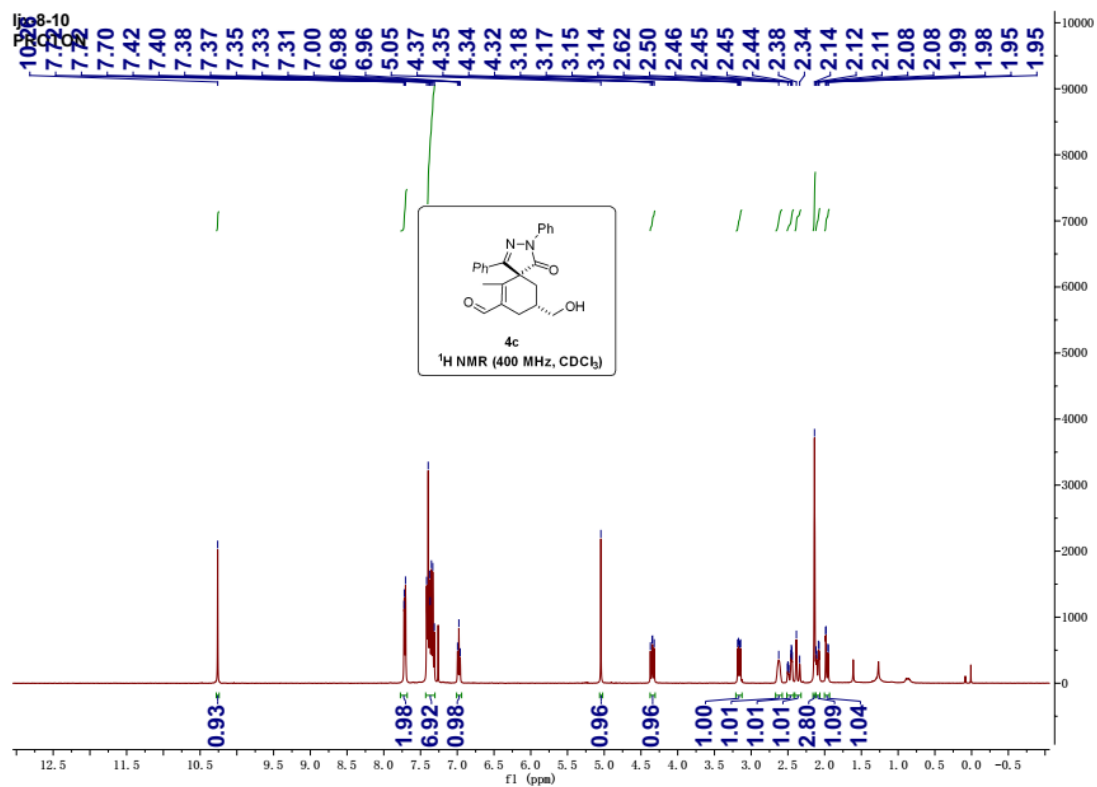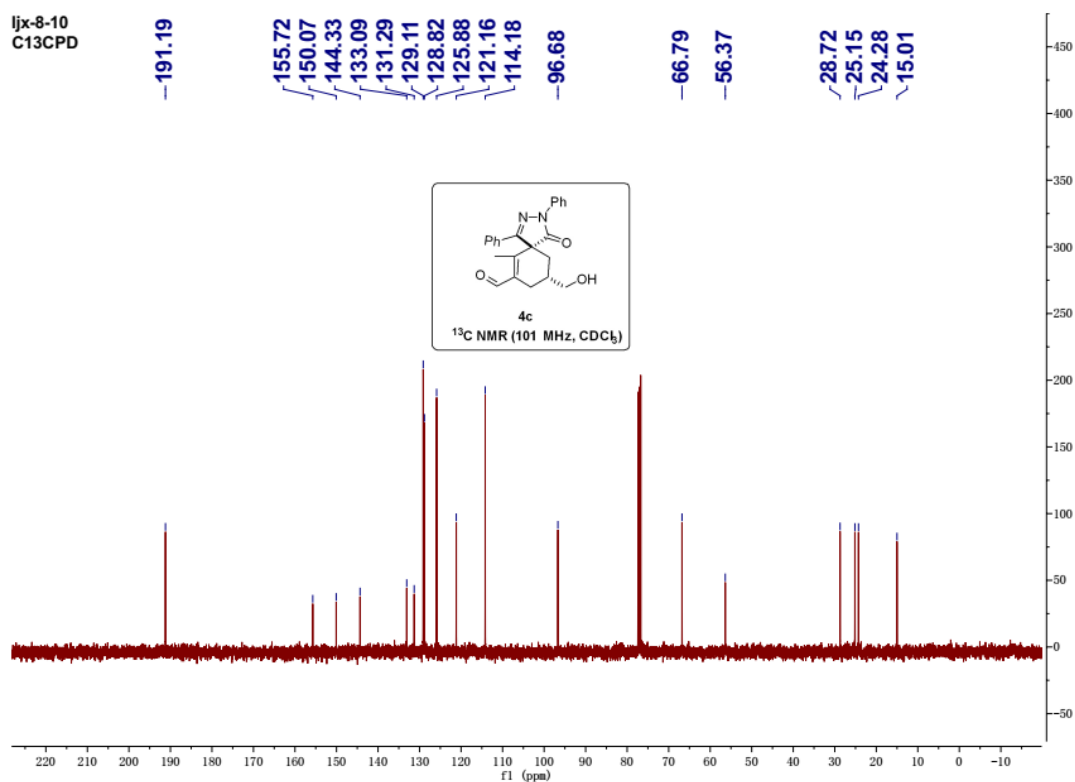

### Wittig Reaction of **4c**

A solution of **4c** (0.082 mmol, 1.0 equiv.), wittig reagent (0.16 mmol, 2.0 equiv.) and 4Å MS (40 mg.) in anhydrous dichloromethane (2 mL) was stirred in an oven-dried 10-mL round bottom flask at 50 °C in oil bath for 24 h. When the reaction was complete detected by TLC, the resulting reaction mixture was

directly purified by chromatography on a silica gel column (30 -120 mesh) using 5:1 petroleum ether-ethyl acetate solvent mixture as eluent to afford desired product **4d** (33 mg, 74% yield) as white solid (melted point 129-131°C).

**<sup>1</sup>H NMR (400 MHz, CDCl<sub>3</sub>)** δ 7.85 (d, *J* = 15.8 Hz, 1H), 7.71 (d, *J* = 6.7 Hz, 2H), 7.39 (d, *J* = 8.3 Hz, 2H), 7.32 (dd, *J* = 15.9, 8.2 Hz, 5H), 6.95 (t, *J* = 7.2 Hz, 1H), 5.99 (d, *J* = 15.7 Hz, 1H), 5.01 (s, 1H), 4.32 (dd, *J* = 11.6, 8.9 Hz, 1H), 4.24 (q, *J* = 7.1 Hz, 2H), 3.21 (dd, *J* = 11.7, 4.7 Hz, 1H), 2.64 – 2.50 (m, 2H), 2.17 (d, *J* = 17.1 Hz, 1H), 2.06 (dd, *J* = 12.4, 3.7 Hz, 1H), 2.00 – 1.94 (m, 1H), 1.89 (s, 3H), 1.32 (t, *J* = 7.1 Hz, 3H).

**<sup>13</sup>C NMR (101 MHz, CDCl<sub>3</sub>)** δ 167.38, 151.10, 144.58, 143.79, 141.85, 131.52, 129.05, 128.90, 128.67, 127.61, 125.95, 120.88, 117.73, 114.10, 96.62, 66.62, 60.50, 55.89, 31.23, 25.51, 24.80, 16.50, 14.36.

**HRMS (ESI):** *m/z* calcd for C<sub>27</sub>H<sub>29</sub>N<sub>2</sub>O<sub>4</sub> ([M+H]<sup>+</sup>): 445.2122; found: 445.2126.

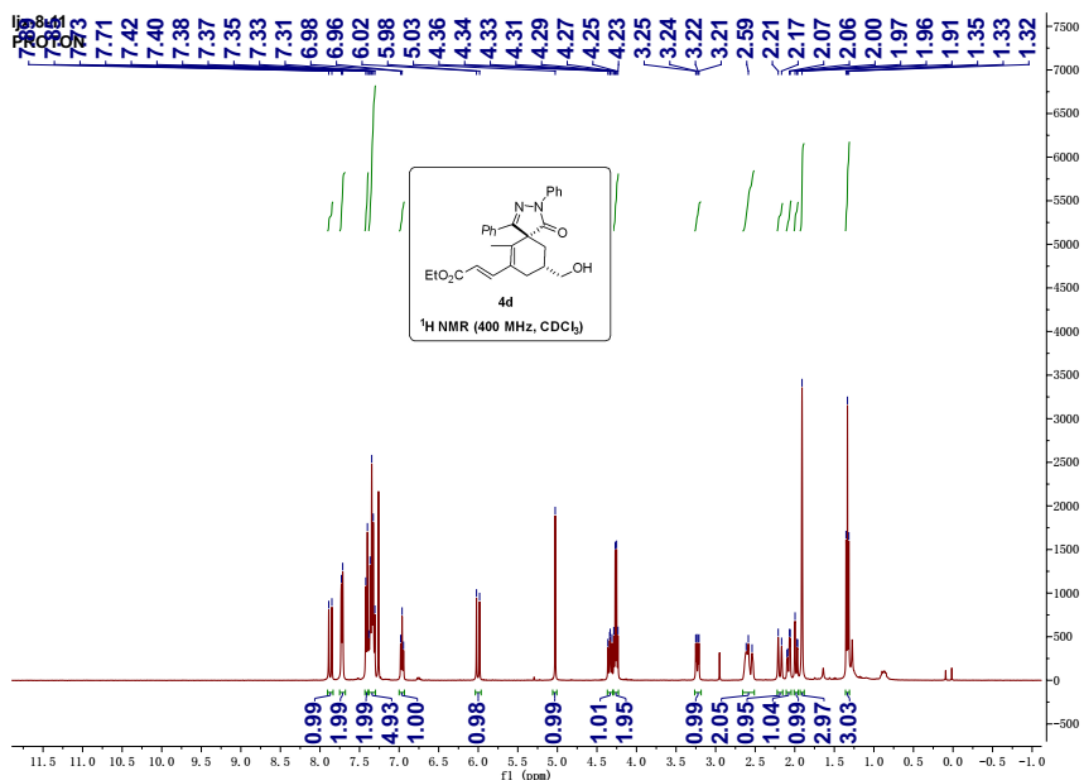

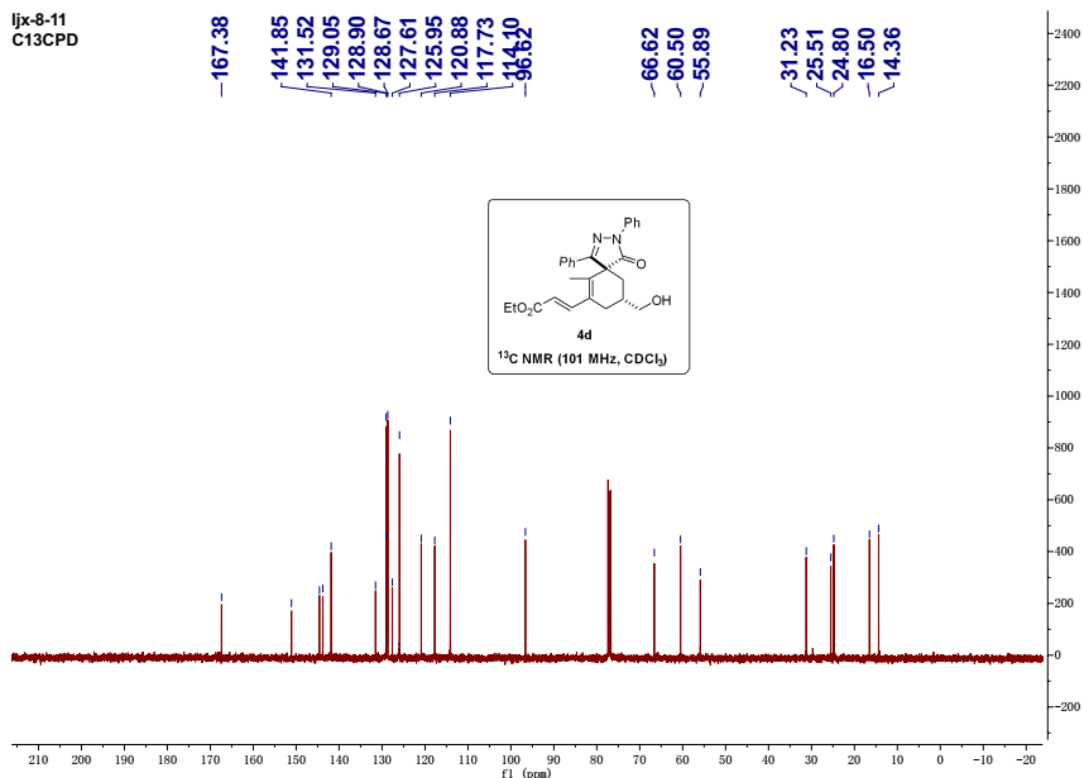

## 5. Mechanism Investigation

### Control experiment (a):

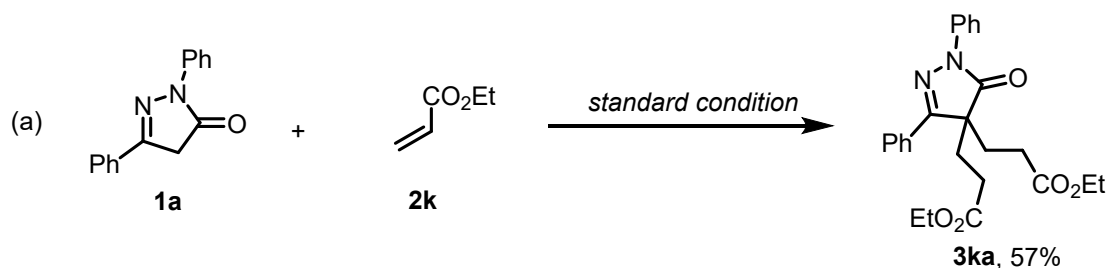

Under 60 °C heated by oil bath, to a solution of pyrazolone **1a** (0.1 mmol) and alkene **2k** (0.2 mmol) in CHCl<sub>3</sub> (2 mL) was added CH<sub>3</sub>OK (20 mol%). The resulting mixture was stirred for 4 hours until the complete consumption of the starting materials monitored by TLC. After removal of CHCl<sub>3</sub>, the residue was diluted with ethyl acetate (2.0 mL) and washed with brine. The volatile was removed under reduced pressure and the residue was purified by preparative TLC (petroleum ether: ethyl acetate = 5:1) to afford desired products (25 mg, 57% yield, yellow oil).

**<sup>1</sup>H NMR (400 MHz, CDCl<sub>3</sub>)** δ 8.04 (d, *J* = 8.1 Hz, 2H), 7.92 (dd, *J* = 6.5, 2.7 Hz, 2H), 7.49 (d, *J* = 2.5 Hz, 2H), 7.48 – 7.43 (m, 3H), 7.26 – 7.23 (m, 1H), 4.00 (q, *J* = 7.1 Hz, 4H), 2.44 (t, *J* = 8.2 Hz, 4H), 2.20 – 2.04 (m, 4H), 1.14 (d, *J* = 7.1 Hz, 6H).

**<sup>13</sup>C NMR (101 MHz, CDCl<sub>3</sub>)** δ 174.83, 171.77, 158.55, 137.71, 130.93, 130.39, 129.25, 128.99, 126.18, 125.60, 118.98, 60.72, 57.61, 31.56, 29.22, 14.06.

**HRMS (ESI):** *m/z* calcd for C<sub>25</sub>H<sub>28</sub>N<sub>2</sub>O<sub>5</sub>Na ([M+Na]<sup>+</sup>): 459.1890; found: 459.1901.

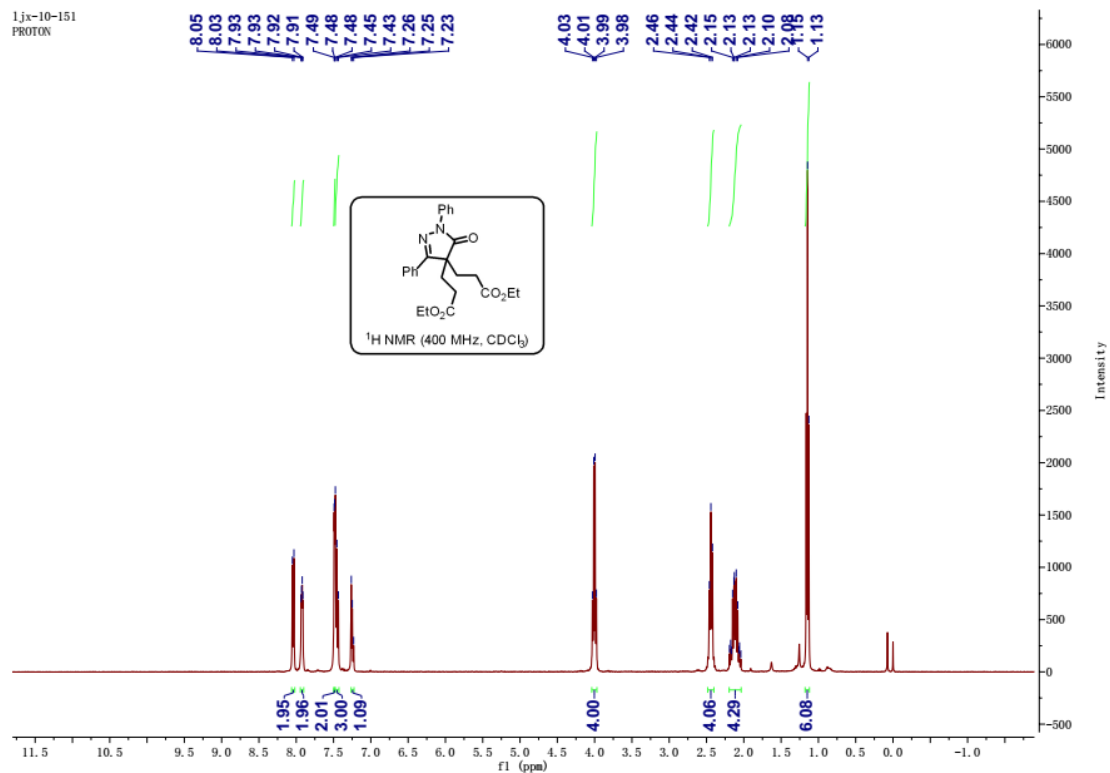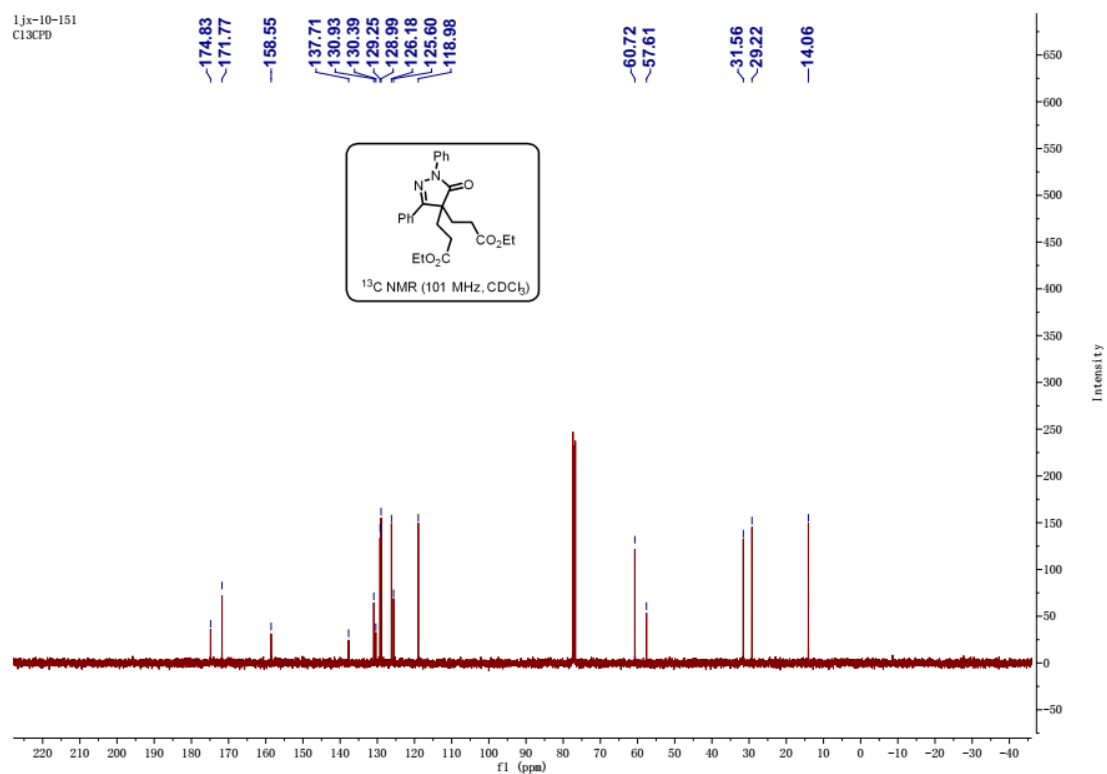

Control experiment (b):

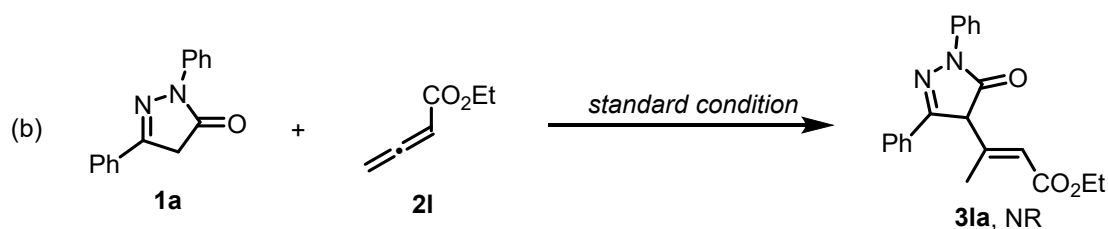

Under 60 °C heated by oil bath, to a solution of pyrazolone **1a** (0.1 mmol) and allene **2l** (0.2 mmol) in  $\text{CHCl}_3$  (2 mL) was added  $\text{CH}_3\text{OK}$  (20 mol%). The resulting mixture was stirred for 4 hours but didn't find consumption of the starting materials **1a** monitored by TLC.

**Control experiment (c):**

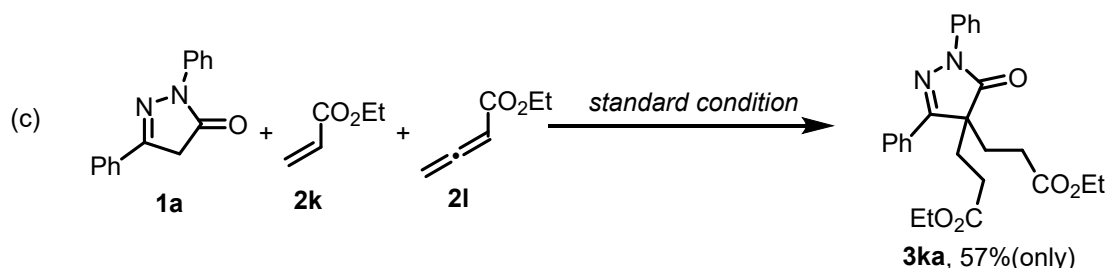

Under 60 °C heated by oil bath, to a solution of pyrazolone **1a** (0.1 mmol), alkene **2k** (0.2 mmol) and allene **2l** (0.2 mmol) in  $\text{CHCl}_3$  (2 mL) was added  $\text{CH}_3\text{OK}$  (20 mol%). The resulting mixture was stirred for 4 hours until the complete consumption of the starting materials monitored by TLC. After removal of  $\text{CHCl}_3$ , the residue was diluted with ethyl acetate (2.0 mL) and washed with brine. The volatile was removed under reduced pressure and the residue was purified by preparative TLC (petroleum ether: ethyl acetate = 5:1) to afford desired products (25 mg, 57% yield).

**Control experiment (d):**

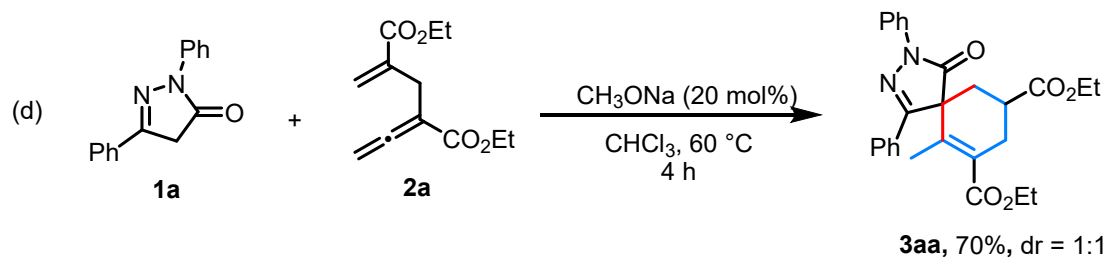

Under 60 °C heated by oil bath, to a solution of pyrazolone **1a** (0.1 mmol) and allenolate **2a** (0.2 mmol) in  $\text{CHCl}_3$  (2 mL) was added  $\text{CH}_3\text{ONa}$  (20 mol%). The resulting mixture was stirred for 4 hours until the complete consumption of the starting materials monitored by TLC. After removal of  $\text{CHCl}_3$ , the residue was diluted with ethyl acetate (2.0 mL) and washed with brine. The volatile was removed under reduced pressure and the residue was purified by preparative TLC (petroleum ether: ethyl acetate = 5:1) to afford desired products (32 mg, 70% yield, dr = 1:1).

## 6. Characterization Data of New Substrates

diethyl 6-methyl-4-oxo-1,3-diphenyl-2,3-diazaspiro[4.5]deca-1,6-diene-7,9-dicarboxylate (**3aa**).

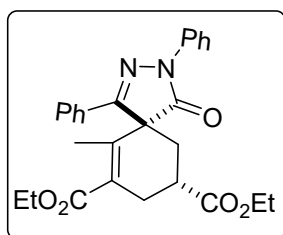

Yellow oil (40 mg, 87% yield)

**<sup>1</sup>H NMR (400 MHz, CDCl<sub>3</sub>)** δ 8.03 (dd, *J* = 8.6, 1.0 Hz, 2H), 7.73 (dd, *J* = 8.0, 1.6 Hz, 2H), 7.51 – 7.42 (m, 5H), 7.23 (d, *J* = 7.4 Hz, 1H), 4.32 – 4.24 (m, 2H), 4.09 (q, *J* = 7.1 Hz, 2H), 2.88 (dd, *J* = 14.3, 1.6 Hz, 1H), 2.74 – 2.58 (m, 2H), 2.31 (dd, *J* = 13.8, 12.2 Hz, 1H), 2.22 – 2.15 (m, 1H), 1.94 (s, 3H), 1.35 (t, *J* = 7.1 Hz, 3H), 1.19 (t, *J* = 7.1 Hz, 3H).

**<sup>13</sup>C NMR (101 MHz, CDCl<sub>3</sub>)** δ 174.33, 173.15, 167.55, 160.74, 137.82, 136.43, 131.51, 130.75, 130.09, 129.05, 128.99, 127.44, 125.61, 119.03, 61.15, 60.97, 60.94, 35.13, 32.75, 28.58, 17.37, 14.27, 14.10.

**HRMS (ESI):** *m/z* calcd for C<sub>27</sub>H<sub>29</sub>N<sub>2</sub>O<sub>5</sub> ([M+H]<sup>+</sup>): 461.2071; found: 461.2069.

**dimethyl 6-methyl-4-oxo-1,3-diphenyl-2,3-diazaspiro[4.5]deca-1,6-diene-7,9-dicarboxylate (3ba).**

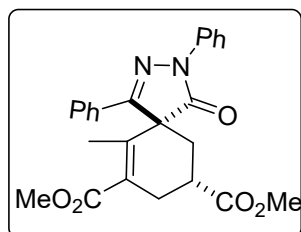

Yellow oil (39 mg, 90% yield)

**<sup>1</sup>H NMR (400 MHz, CDCl<sub>3</sub>)** δ 8.02 (d, *J* = 7.8 Hz, 2H), 7.75 – 7.68 (m, 2H), 7.50 – 7.42 (m, 5H), 7.23 (d, *J* = 7.4 Hz, 1H), 3.82 (s, 3H), 3.63 (s, 3H), 2.91 – 2.81 (m, 1H), 2.77 – 2.59 (m, 2H), 2.31 (dd, *J* = 13.8, 11.9 Hz, 1H), 2.23 – 2.16 (m, 1H), 1.95 (s, 3H).

**<sup>13</sup>C NMR (101 MHz, CDCl<sub>3</sub>)** δ 174.18, 173.51, 167.81, 160.58, 137.80, 137.29, 131.42, 130.79, 129.65, 129.06, 128.99, 127.40, 125.63, 61.09, 52.06, 51.90, 34.96, 32.64, 28.49, 17.47.

**HRMS (ESI):** *m/z* calcd for C<sub>25</sub>H<sub>25</sub>N<sub>2</sub>O<sub>5</sub> ([M+H]<sup>+</sup>): 433.1758; found: 433.1760.

**7-ethyl 9-methyl 6-methyl-4-oxo-1,3-diphenyl-2,3-diazaspiro[4.5]deca-1,6-diene-7,9-dicarboxylate (3ca).**

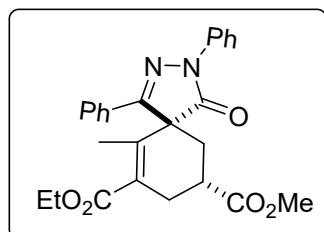

Yellow oil (39 mg, 87% yield)

**<sup>1</sup>H NMR (400 MHz, CDCl<sub>3</sub>)** δ 8.05 – 7.99 (m, 2H), 7.72 (dd, *J* = 7.9, 1.5 Hz, 2H), 7.49 – 7.42 (m, 5H), 7.23 (d, *J* = 7.4 Hz, 1H), 4.33 – 4.23 (m, 2H), 3.63 (s, 3H), 2.87 (dd, *J* = 14.0, 1.2 Hz, 1H), 2.75 – 2.61 (m, 2H), 2.31 (dd, *J* = 13.9, 12.0 Hz, 1H), 2.23 – 2.14 (m, 1H), 1.94 (s, 3H), 1.35 (t, *J* = 7.1 Hz, 3H).

**<sup>13</sup>C NMR (101 MHz, CDCl<sub>3</sub>)** δ 174.24, 173.59, 167.47, 160.66, 137.81, 136.56, 131.46, 130.76, 129.97, 129.05, 128.99, 127.42, 125.62, 119.04, 61.09, 60.94, 52.05, 34.98, 32.68, 28.49, 17.37, 14.27.

**HRMS (ESI):**  $m/z$  calcd for  $C_{26}H_{27}N_2O_5$  ( $[M+H]^+$ ): 447.1914; found: 447.1918.

**7-benzyl 9-ethyl 6-methyl-4-oxo-1,3-diphenyl-2,3-diazaspiro[4.5]deca-1,6-diene-7,9-dicarboxylate (3da).**

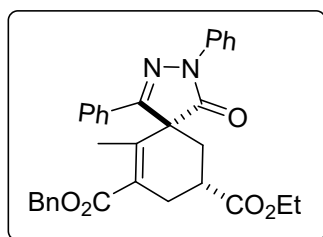

Yellow oil (43 mg, 82% yield)

**$^1H$  NMR (400 MHz,  $CDCl_3$ )**  $\delta$  8.02 (d,  $J = 7.9$  Hz, 2H), 8.02 (d,  $J = 7.9$  Hz, 2H), 7.72 (d,  $J = 6.9$  Hz, 2H), 7.72 (d,  $J = 6.9$  Hz, 2H), 7.48 – 7.35 (m, 10H), 7.70 – 7.18 (m, 13H), 7.23 (d,  $J = 7.2$  Hz, 1H), 5.26 (s, 2H), 5.26 (s, 2H), 4.07 (dd,  $J = 14.0, 6.9$  Hz, 2H), 2.90 (d,  $J = 16.7$  Hz, 1H), 2.67 (dt,  $J = 22.4, 10.5$  Hz, 2H), 2.32 (t,  $J = 13.0$  Hz, 1H), 2.18 (d,  $J = 13.3$  Hz, 1H), 1.94 (s, 3H), 1.18 (t,  $J = 7.0$  Hz, 3H).

**$^{13}C$  NMR (101 MHz,  $CDCl_3$ )**  $\delta$  174.22, 173.06, 167.20, 160.64, 137.78, 137.40, 135.66, 131.44, 130.75, 129.69, 129.05, 128.98, 128.64, 128.35, 128.32, 127.41, 125.62, 119.02, 66.73, 61.19, 60.96, 35.11, 32.69, 28.52, 17.51, 14.07.

**HRMS (ESI):**  $m/z$  calcd for  $C_{32}H_{31}N_2O_5$  ( $[M+H]^+$ ): 523.2227; found: 523.2233.

**9-butyl 7-ethyl 6-methyl-4-oxo-1,3-diphenyl-2,3-diazaspiro[4.5]deca-1,6-diene-7,9-dicarboxylate (3ea).**

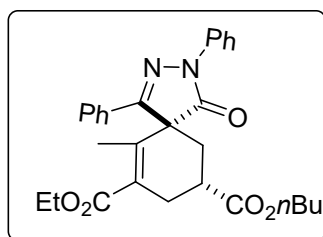

Yellow oil (44 mg, 90% yield)

**$^1H$  NMR (400 MHz,  $CDCl_3$ )**  $\delta$  8.06 – 7.99 (m, 2H), 7.72 (dd,  $J = 7.9, 1.5$  Hz, 2H), 7.46 (td,  $J = 7.9, 2.2$  Hz, 5H), 7.23 (d,  $J = 7.4$  Hz, 1H), 4.31 – 4.24 (m, 2H), 4.06 – 3.99 (m, 2H), 2.88 (dd,  $J = 14.3, 1.5$  Hz, 1H), 2.75 – 2.57 (m, 2H), 2.31 (dd,  $J = 13.8, 12.1$  Hz, 1H), 2.22 – 2.14 (m, 1H), 1.94 (s, 3H), 1.54 (dt,  $J = 14.6, 6.8$  Hz, 2H), 1.35 (t,  $J = 7.1$  Hz, 3H), 1.30 (dd,  $J = 15.1, 7.5$  Hz, 2H), 0.88 (t,  $J = 7.4$  Hz, 3H).

**$^{13}C$  NMR (101 MHz,  $CDCl_3$ )**  $\delta$  174.30, 173.18, 167.54, 160.77, 137.82, 136.42, 131.50, 130.74, 130.11, 129.04, 128.98, 127.45, 125.61, 119.03, 64.86, 61.17, 60.93, 35.19, 32.73, 30.48, 28.57, 19.07, 17.67, 17.36, 14.26, 13.68.

**HRMS (ESI):**  $m/z$  calcd for  $C_{29}H_{33}N_2O_5$  ( $[M+H]^+$ ): 489.2384; found: 489.2386.

**9-(tert-butyl) 7-methyl 6-methyl-4-oxo-1,3-diphenyl-2,3-diazaspiro[4.5]deca-1,6-diene-7,9-dicarboxylate (3fa).**



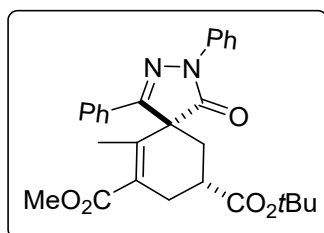

Yellow oil (45 mg, 95% yield)

**<sup>1</sup>H NMR (400 MHz, CDCl<sub>3</sub>)** δ 8.03 (d, *J* = 7.7 Hz, 2H), 7.72 (dd, *J* = 7.9, 1.4 Hz, 2H), 7.46 (q, *J* = 8.0 Hz, 5H), 7.23 (d, *J* = 7.4 Hz, 1H), 3.82 (s, 3H), 2.90 – 2.80 (m, 1H), 2.67 – 2.56 (m, 1H), 2.55 – 2.45 (m, 1H), 2.25 (t, *J* = 13.3 Hz, 1H), 2.16 – 2.09 (m, 1H), 1.93 (s, 3H), 1.38 (s, 9H).

**<sup>13</sup>C NMR (101 MHz, CDCl<sub>3</sub>)** δ 174.43, 172.35, 168.00, 160.88, 137.83, 136.94, 131.60, 130.71, 130.01, 129.01, 128.99, 127.48, 125.61, 119.04, 81.22, 61.39, 51.87, 36.12, 33.10, 28.80, 27.94, 17.43.

**HRMS (ESI):** *m/z* calcd for C<sub>28</sub>H<sub>30</sub>N<sub>2</sub>O<sub>5</sub>Na ([M+Na]<sup>+</sup>): 497.2047; found: 497.2050.

**7-benzhydryl 9-ethyl 6-methyl-4-oxo-1,3-diphenyl-2,3-diazaspiro[4.5]deca-1,6-diene-7,9-dicarboxylate (3ga).**

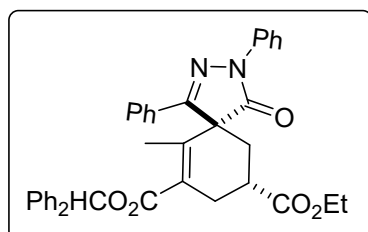

Yellow oil (isolated: 52 mg, 87% yield) (<sup>1</sup>H NMR yield: 84% yield)

**<sup>1</sup>H NMR (400 MHz, CDCl<sub>3</sub>)** δ 8.01 (d, *J* = 8.1 Hz, 2H), 7.71 (d, *J* = 7.5 Hz, 2H), 7.47 – 7.28 (m, 15H), 7.25 – 7.21 (m, 1H), 7.01 (s, 1H), 4.09 (q, *J* = 7.0 Hz, 2H), 2.94 (dd, *J* = 17.3, 4.3 Hz, 1H), 2.86 – 2.75 (m, 1H), 2.63 (dt, *J* = 10.1, 4.3 Hz, 1H), 2.34 (t, *J* = 13.1 Hz, 1H), 2.23 – 2.16 (m, 1H), 1.91 (s, 3H), 1.19 (t, *J* = 7.1 Hz, 3H).

**<sup>13</sup>C NMR (101 MHz, CDCl<sub>3</sub>)** δ 174.19, 173.09, 166.38, 160.64, 140.13, 139.90, 137.78, 137.52, 131.47, 130.78, 129.66, 129.08, 129.00, 128.68, 128.64, 128.09, 127.44, 127.17, 127.12, 125.66, 119.05, 77.65, 61.21, 61.01, 35.12, 32.70, 28.47, 17.52, 14.09.

**HRMS (ESI):** *m/z* calcd for C<sub>38</sub>H<sub>34</sub>N<sub>2</sub>O<sub>5</sub>Na ([M+H]<sup>+</sup>): 621.2360; found: 621.2362.

**diethyl 1,6-dimethyl-4-oxo-3-phenyl-2,3-diazaspiro[4.5]deca-1,6-diene-7,9-dicarboxylate (3ab).**

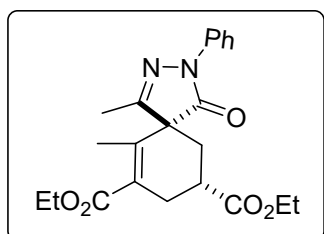

Yellow oil (20 mg, 50% yield)

**<sup>1</sup>H NMR (400 MHz, CDCl<sub>3</sub>)** δ 7.94 – 7.88 (m, 2H), 7.44 – 7.37 (m, 2H), 7.24 – 7.18 (m, 1H), 4.24 (td, *J* = 7.1, 0.9 Hz, 2H), 4.17 (t, *J* = 7.1 Hz, 2H), 2.86 (ddd, *J* = 17.2, 3.1, 1.5 Hz, 1H), 2.81 – 2.72 (m, 1H), 2.65 – 2.55 (m, 1H), 2.26 – 2.18 (m, 1H), 2.16 (s, 3H), 2.15 – 2.10 (m, 1H), 1.76 (dd, *J* = 2.2, 1.2 Hz, 3H), 1.32 (t, *J* = 7.1 Hz, 3H), 1.27 (t, *J* = 7.1 Hz, 3H).

$^{13}\text{C}$  NMR (101 MHz,  $\text{CDCl}_3$ )  $\delta$  174.09, 173.22, 167.42, 161.74, 137.75, 135.52, 130.27, 128.96, 125.40, 118.86, 61.61, 61.15, 60.89, 36.28, 31.91, 28.65, 16.38, 16.06, 14.25, 14.21.

HRMS (ESI):  $m/z$  calcd for  $\text{C}_{22}\text{H}_{27}\text{N}_2\text{O}_5$  ( $[\text{M}+\text{H}]^+$ ): 399.1914; found: 399.1918.

**diethyl 1-ethyl-6-methyl-4-oxo-3-phenyl-2,3-diazaspiro[4.5]deca-1,6-diene-7,9-dicarboxylate (3ac).**

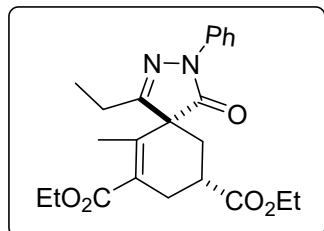

Yellow oil (19 mg, 46% yield)

$^1\text{H}$  NMR (400 MHz,  $\text{CDCl}_3$ )  $\delta$  7.97 – 7.91 (m, 2H), 7.45 – 7.38 (m, 2H), 7.23 – 7.18 (m, 1H), 4.26 – 4.15 (m, 4H), 2.89 – 2.81 (m, 1H), 2.81 – 2.72 (m, 1H), 2.64 – 2.47 (m, 2H), 2.37 (dq,  $J = 17.6, 7.3$  Hz, 1H), 2.26 – 2.16 (m, 1H), 2.12 (ddd,  $J = 13.8, 3.4, 1.8$  Hz, 1H), 1.75 (dd,  $J = 2.2, 1.2$  Hz, 3H), 1.34 – 1.25 (m, 9H).

$^{13}\text{C}$  NMR (101 MHz,  $\text{CDCl}_3$ )  $\delta$  174.25, 173.29, 167.46, 165.70, 137.94, 135.95, 130.03, 128.93, 125.31, 118.86, 61.73, 61.13, 60.87, 36.39, 32.04, 28.63, 23.47, 16.45, 14.25, 14.21, 9.69.

HRMS (ESI):  $m/z$  calcd for  $\text{C}_{23}\text{H}_{29}\text{N}_2\text{O}_5$  ( $[\text{M}+\text{H}]^+$ ): 413.2071; found: 413.2072.

**diethyl 6-methyl-4-oxo-3-phenyl-1-propyl-2,3-diazaspiro[4.5]deca-1,6-diene-7,9-dicarboxylate (3ad).**

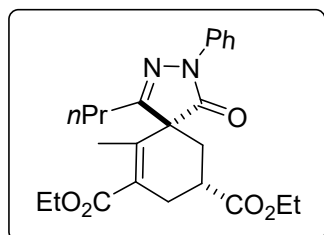

Yellow oil (25 mg, 59% yield)

$^1\text{H}$  NMR (400 MHz,  $\text{CDCl}_3$ )  $\delta$  7.94 (dd,  $J = 8.7, 1.0$  Hz, 2H), 7.44 – 7.38 (m, 2H), 7.20 (t,  $J = 7.4$  Hz, 1H), 4.26 – 4.15 (m, 4H), 2.90 – 2.82 (m, 1H), 2.81 – 2.71 (m, 1H), 2.59 (ddd,  $J = 17.1, 11.3, 2.5$  Hz, 1H), 2.49 – 2.40 (m, 1H), 2.29 (ddd,  $J = 17.1, 8.7, 6.6$  Hz, 1H), 2.20 (t,  $J = 13.4$  Hz, 1H), 2.12 (ddd,  $J = 13.8, 3.4, 1.7$  Hz, 1H), 1.83 (dt,  $J = 23.2, 8.0$  Hz, 2H), 1.75 (d,  $J = 0.9$  Hz, 3H), 1.32 (t,  $J = 7.1$  Hz, 3H), 1.27 (t,  $J = 7.1$  Hz, 3H), 1.06 (t,  $J = 7.4$  Hz, 3H).

$^{13}\text{C}$  NMR (101 MHz,  $\text{CDCl}_3$ )  $\delta$  174.16, 173.28, 167.44, 164.59, 137.91, 135.99, 130.00, 128.91, 125.29, 118.82, 61.78, 61.11, 60.84, 36.35, 32.04, 31.90, 28.62, 18.63, 16.49, 14.24, 14.20, 13.94.

HRMS (ESI):  $m/z$  calcd for  $\text{C}_{24}\text{H}_{31}\text{N}_2\text{O}_5$  ( $[\text{M}+\text{H}]^+$ ): 427.2227; found: 427.2228.

**diethyl 1-isopropyl-6-methyl-4-oxo-3-phenyl-2,3-diazaspiro[4.5]deca-1,6-diene-7,9-dicarboxylate (3ae).**

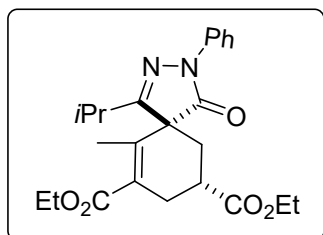

Yellow oil (25 mg, 59% yield)

**<sup>1</sup>H NMR (400 MHz, CDCl<sub>3</sub>)** δ 7.97 – 7.91 (m, 2H), 7.44 – 7.38 (m, 2H), 7.23 – 7.17 (m, 1H), 4.26 – 4.15 (m, 4H), 2.91 – 2.56 (m, 4H), 2.24 – 2.11 (m, 2H), 1.76 (dd, *J* = 2.2, 1.2 Hz, 3H), 1.37 – 1.25 (m, 12H).

**<sup>13</sup>C NMR (101 MHz, CDCl<sub>3</sub>)** δ 174.06, 173.33, 169.08, 167.45, 137.94, 136.36, 129.82, 128.92, 125.32, 118.89, 61.90, 61.13, 60.84, 36.31, 32.22, 29.58, 28.58, 21.45, 21.21, 16.88, 14.26, 14.21.

**HRMS (ESI):** *m/z* calcd for C<sub>24</sub>H<sub>31</sub>N<sub>2</sub>O<sub>5</sub> ([M+H]<sup>+</sup>): 427.2227; found: 427.2230.

**diethyl 3-(4-methoxyphenyl)-6-methyl-4-oxo-1-phenyl-2,3-diazaspiro[4.5]deca-1,6-diene-7,9-dicarboxylate (3ag).**

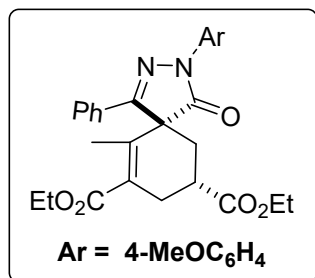

Yellow oil (38 mg, 78% yield)

**<sup>1</sup>H NMR (400 MHz, CDCl<sub>3</sub>)** δ 7.93 – 7.87 (m, 2H), 7.71 (dd, *J* = 7.9, 1.5 Hz, 2H), 7.50 – 7.40 (m, 3H), 7.00 – 6.94 (m, 2H), 4.33 – 4.23 (m, 2H), 4.08 (q, *J* = 7.2 Hz, 2H), 3.84 (s, 3H), 2.92 – 2.84 (m, 1H), 2.72 – 2.57 (m, 2H), 2.35 – 2.25 (m, 1H), 2.17 (dd, *J* = 14.8, 2.6 Hz, 1H), 1.93 (s, 3H), 1.35 (t, *J* = 7.1 Hz, 3H), 1.19 (t, *J* = 7.1 Hz, 3H).

**<sup>13</sup>C NMR (101 MHz, CDCl<sub>3</sub>)** δ 173.98, 173.19, 167.55, 160.60, 157.40, 136.58, 131.59, 131.15, 130.65, 129.99, 129.02, 127.40, 120.86, 114.11, 60.97, 60.95, 60.91, 55.54, 35.13, 32.70, 28.59, 17.34, 14.27, 14.09.

**HRMS (ESI):** *m/z* calcd for C<sub>28</sub>H<sub>31</sub>N<sub>2</sub>O<sub>6</sub> ([M+H]<sup>+</sup>): 491.2177; found: 491.2181.

**diethyl 6-methyl-4-oxo-1-phenyl-3-(p-tolyl)-2,3-diazaspiro[4.5]deca-1,6-diene-7,9-dicarboxylate (3ah).**

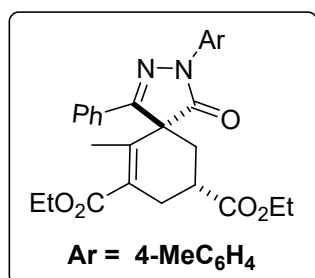

Yellow oil (43 mg, 91% yield)

**<sup>1</sup>H NMR (400 MHz, CDCl<sub>3</sub>)** δ 7.88 (d, *J* = 8.4 Hz, 2H), 7.75 – 7.69 (m, 2H), 7.50 – 7.40 (m, 3H), 7.27

– 7.20 (m, 2H), 4.28 (tt,  $J = 7.1, 3.6$  Hz, 2H), 4.08 (q,  $J = 7.1$  Hz, 2H), 2.88 (d,  $J = 15.5$  Hz, 1H), 2.73 – 2.55 (m, 2H), 2.37 (s, 3H), 2.35 – 2.26 (m, 1H), 2.21 – 2.13 (m, 1H), 1.93 (s, 3H), 1.35 (t,  $J = 7.1$  Hz, 3H), 1.19 (t,  $J = 7.1$  Hz, 3H).

$^{13}\text{C}$  NMR (101 MHz,  $\text{CDCl}_3$ )  $\delta$  174.16, 173.18, 167.56, 160.60, 136.53, 135.41, 135.38, 131.60, 130.66, 130.02, 129.48, 129.02, 127.43, 119.10, 61.07, 60.94, 60.91, 35.16, 32.73, 28.59, 21.00, 17.32, 14.27, 14.09.

HRMS (ESI):  $m/z$  calcd for  $\text{C}_{28}\text{H}_{31}\text{N}_2\text{O}_5$  ( $[\text{M}+\text{H}]^+$ ): 475.2227; found: 475.2231.

**diethyl 3-(4-isopropylphenyl)-6-methyl-4-oxo-1-phenyl-2,3-diazaspiro[4.5]deca-1,6-diene-7,9-dicarboxylate (3ai).**

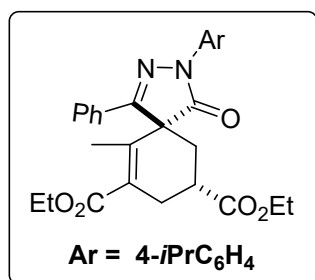

Yellow oil (39 mg, 90% yield)

$^1\text{H}$  NMR (400 MHz,  $\text{CDCl}_3$ )  $\delta$  7.92 (d,  $J = 8.1$  Hz, 2H), 7.72 (d,  $J = 6.6$  Hz, 2H), 7.45 (d,  $J = 7.2$  Hz, 3H), 7.30 (d,  $J = 8.1$  Hz, 2H), 4.28 (dd,  $J = 6.6$  Hz, 2H), 4.08 (dd,  $J = 13.8, 6.8$  Hz, 2H), 2.99 – 2.81 (m, 2H), 2.67 (dd,  $J = 27.6, 11.0$  Hz, 2H), 2.30 (t,  $J = 12.8$  Hz, 1H), 2.17 (d,  $J = 13.4$  Hz, 1H), 1.93 (s, 3H), 1.35 (t,  $J = 7.0$  Hz, 3H), 1.27 (d,  $J = 6.7$  Hz, 6H), 1.19 (t,  $J = 7.0$  Hz, 3H).

$^{13}\text{C}$  NMR (101 MHz,  $\text{CDCl}_3$ )  $\delta$  174.17, 173.18, 167.55, 160.59, 146.45, 136.57, 135.58, 131.58, 130.65, 129.98, 129.01, 127.42, 126.89, 119.22, 61.05, 60.94, 60.90, 35.13, 33.74, 32.72, 28.59, 24.02, 17.32, 14.26, 14.09.

HRMS (ESI):  $m/z$  calcd for  $\text{C}_{30}\text{H}_{35}\text{N}_2\text{O}_5$  ( $[\text{M}+\text{H}]^+$ ): 503.2540; found: 503.2543.

**diethyl 3-(4-fluorophenyl)-6-methyl-4-oxo-1-phenyl-2,3-diazaspiro[4.5]deca-1,6-diene-7,9-dicarboxylate (3aj).**

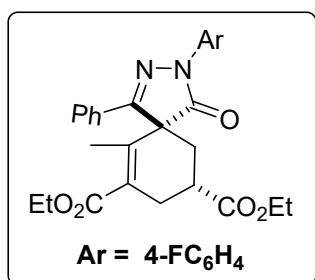

Yellow oil (42 mg, 88% yield)

$^1\text{H}$  NMR (400 MHz,  $\text{CDCl}_3$ )  $\delta$  8.00 (s, 2H), 7.72 (d,  $J = 6.2$  Hz, 2H), 7.46 (d,  $J = 7.2$  Hz, 3H), 7.13 (t,  $J = 7.8$  Hz, 2H), 4.29 (d,  $J = 6.5$  Hz, 2H), 4.09 (d,  $J = 6.8$  Hz, 2H), 2.88 (d,  $J = 15.1$  Hz, 1H), 2.67 (dd,  $J = 29.1, 11.3$  Hz, 2H), 2.30 (t,  $J = 12.6$  Hz, 1H), 2.18 (d,  $J = 13.5$  Hz, 1H), 1.93 (s, 3H), 1.35 (t,  $J = 6.6$  Hz, 3H), 1.19 (t,  $J = 6.5$  Hz, 3H).

$^{13}\text{C}$  NMR (101 MHz,  $\text{CDCl}_3$ )  $\delta$  174.17, 173.10, 167.51, 161.41, 160.92, 158.98, 136.20, 133.95, 131.37, 130.84, 130.21, 129.07, 127.43, 120.82, 120.74, 115.81, 115.59, 61.07, 60.97, 35.08, 32.72, 28.56, 17.36, 14.26, 14.09.

$^{19}\text{F}$  NMR (376 MHz,  $\text{CDCl}_3$ )  $\delta$  -116.30.

HRMS (ESI):  $m/z$  calcd for  $\text{C}_{27}\text{H}_{28}\text{FN}_2\text{O}_5$  ( $[\text{M}+\text{H}]^+$ ): 479.1977; found: 479.1981.

diethyl 3-(4-fluorophenyl)-6-methyl-4-oxo-1-phenyl-2,3-diazaspiro[4.5]deca-1,6-diene-7,9-dicarboxylate (3ak).

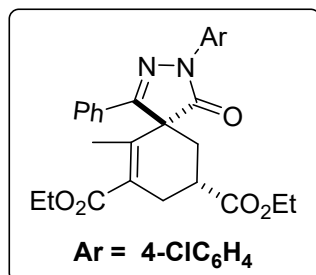

Yellow oil (47 mg, 95% yield)

$^1\text{H}$  NMR (400 MHz,  $\text{CDCl}_3$ )  $\delta$  8.00 (d,  $J$  = 8.9 Hz, 2H), 7.72 (d,  $J$  = 6.8 Hz, 2H), 7.50 – 7.43 (m, 3H), 7.40 (d,  $J$  = 8.9 Hz, 2H), 4.29 (dd,  $J$  = 13.5, 6.4 Hz, 2H), 4.09 (q,  $J$  = 7.1 Hz, 2H), 2.88 (d,  $J$  = 15.5 Hz, 1H), 2.74 – 2.56 (m, 2H), 1.92 (s, 3H), 1.35 (t,  $J$  = 7.1 Hz, 3H), 1.19 (t,  $J$  = 7.1 Hz, 3H).

$^{13}\text{C}$  NMR (101 MHz,  $\text{CDCl}_3$ )  $\delta$  174.28, 173.05, 167.48, 161.03, 136.37, 136.07, 131.27, 130.91, 130.70, 130.27, 129.08, 129.01, 127.43, 120.07, 61.12, 60.98, 35.06, 32.70, 28.53, 17.37, 14.26, 14.08.

HRMS (ESI):  $m/z$  calcd for  $\text{C}_{27}\text{H}_{28}\text{ClN}_2\text{O}_5$  ( $[\text{M}+\text{H}]^+$ ): 495.1681; found: 495.1685.

diethyl 3-(4-bromophenyl)-6-methyl-4-oxo-1-phenyl-2,3-diazaspiro[4.5]deca-1,6-diene-7,9-dicarboxylate (3al).

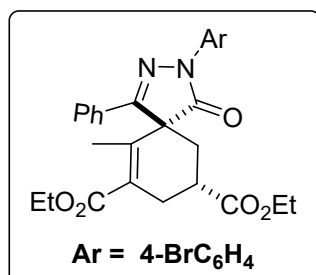

Yellow oil (50 mg, 93% yield)

$^1\text{H}$  NMR (400 MHz,  $\text{CDCl}_3$ )  $\delta$  7.98 – 7.91 (m, 2H), 7.72 (dd,  $J$  = 7.9, 1.3 Hz, 2H), 7.57 – 7.53 (m, 2H), 7.50 – 7.43 (m, 3H), 4.32 – 4.25 (m, 2H), 4.09 (q,  $J$  = 7.1 Hz, 2H), 2.93 – 2.84 (m, 1H), 2.65 (dtd,  $J$  = 15.4, 10.7, 3.4 Hz, 2H), 2.35 – 2.25 (m, 1H), 2.22 – 2.14 (m, 1H), 1.92 (s, 3H), 1.35 (t,  $J$  = 7.1 Hz, 3H), 1.19 (t,  $J$  = 7.1 Hz, 3H).

$^{13}\text{C}$  NMR (101 MHz,  $\text{CDCl}_3$ )  $\delta$  174.30, 173.04, 167.48, 161.05, 136.87, 136.04, 131.97, 131.26, 130.93, 130.29, 129.09, 127.44, 120.36, 118.48, 61.14, 60.98, 35.06, 32.70, 28.53, 17.37, 14.26, 14.09.

HRMS (ESI):  $m/z$  calcd for  $\text{C}_{27}\text{H}_{28}\text{BrN}_2\text{O}_5$  ( $[\text{M}+\text{H}]^+$ ): 539.1176; found: 539.1179.

diethyl 3-(4-cyanophenyl)-6-methyl-4-oxo-1-phenyl-2,3-diazaspiro[4.5]deca-1,6-diene-7,9-dicarboxylate (3am).

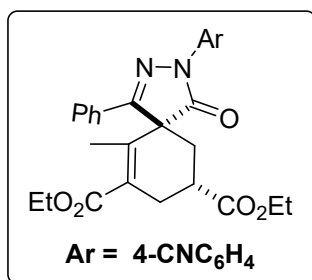

Yellow oil (42 mg, 87% yield)

**<sup>1</sup>H NMR (400 MHz, CDCl<sub>3</sub>)** δ 8.23 (d, *J* = 8.8 Hz, 2H), 7.77 – 7.70 (m, 4H), 7.55 – 7.44 (m, 3H), 4.34 – 4.25 (m, 2H), 4.09 (q, *J* = 7.1 Hz, 2H), 2.88 (dd, *J* = 9.3, 7.8 Hz, 1H), 2.76 – 2.56 (m, 2H), 2.31 (dd, *J* = 13.8, 11.9 Hz, 1H), 2.20 (dd, *J* = 13.9, 2.3 Hz, 1H), 1.92 (s, 3H), 1.36 (t, *J* = 7.1 Hz, 3H), 1.20 (t, *J* = 7.1 Hz, 3H).

**<sup>13</sup>C NMR (101 MHz, CDCl<sub>3</sub>)** δ 174.79, 172.88, 167.39, 161.72, 141.17, 135.44, 133.20, 131.24, 130.91, 130.65, 129.17, 127.50, 118.71, 118.61, 108.42, 61.25, 61.05, 35.01, 32.74, 28.46, 17.41, 14.25, 14.08.

**HRMS (ESI):** *m/z* calcd for C<sub>28</sub>H<sub>28</sub>N<sub>3</sub>O<sub>5</sub> ([M+H]<sup>+</sup>): 486.2023; found: 486.2028.

**diethyl 6-methyl-4-oxo-1-phenyl-3-(4-(trifluoromethyl)phenyl)-2,3-diazaspiro[4.5]deca-1,6-diene-7,9-dicarboxylate (3an).**

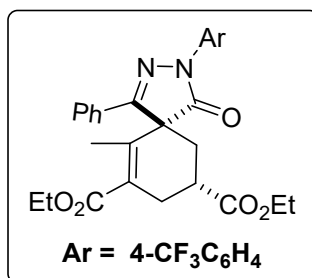

Yellow oil (49.5 mg, 94% yield)

**<sup>1</sup>H NMR (400 MHz, CDCl<sub>3</sub>)** δ 8.21 (d, *J* = 8.6 Hz, 2H), 7.76 – 7.68 (m, 4H), 7.54 – 7.44 (m, 3H), 4.33 – 4.26 (m, 2H), 4.09 (q, *J* = 7.1 Hz, 2H), 2.93 – 2.85 (m, 1H), 2.76 – 2.58 (m, 2H), 2.36 – 2.28 (m, 1H), 2.23 – 2.17 (m, 1H), 1.93 (s, 3H), 1.36 (t, *J* = 7.1 Hz, 3H), 1.20 (t, *J* = 7.1 Hz, 3H).

**<sup>13</sup>C NMR (101 MHz, CDCl<sub>3</sub>)** δ 174.69, 173.00, 167.47, 161.39, 140.53, 135.80, 131.14, 131.09, 130.48, 129.15, 127.50, 127.32, 127.00, 126.26, 126.22, 125.41, 122.71, 61.24, 61.04, 35.07, 32.74, 28.52, 17.39, 14.26, 14.09.

**<sup>19</sup>F NMR (376 MHz, CDCl<sub>3</sub>)** δ -62.18.

**HRMS (ESI):** *m/z* calcd for C<sub>28</sub>H<sub>28</sub>F<sub>3</sub>N<sub>2</sub>O<sub>5</sub> ([M+H]<sup>+</sup>): 529.1945; found: 529.1946.

**diethyl 6-methyl-3-(naphthalen-2-yl)-4-oxo-1-phenyl-2,3-diazaspiro[4.5]deca-1,6-diene-7,9-dicarboxylate (3ao).**

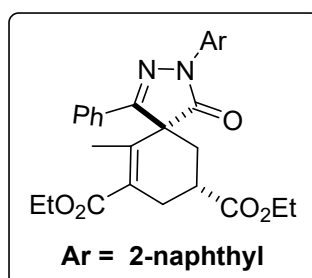

Yellow oil (45.6 mg, 89% yield)

**<sup>1</sup>H NMR (400 MHz, CDCl<sub>3</sub>)** δ 8.51 (s, 1H), 8.24 – 8.16 (m, 1H), 7.93 – 7.82 (m, 3H), 7.77 (d, *J* = 6.2 Hz, 2H), 7.48 (dq, *J* = 13.2, 6.7 Hz, 5H), 4.29 (dd, *J* = 13.4, 6.4 Hz, 2H), 4.09 (q, *J* = 7.1 Hz, 2H), 2.90 (d, *J* = 15.5 Hz, 1H), 2.76 – 2.59 (m, 2H), 2.36 (t, *J* = 12.8 Hz, 1H), 2.24 (d, *J* = 13.9 Hz, 1H), 1.97 (s, 3H), 1.36 (t, *J* = 7.1 Hz, 3H), 1.19 (t, *J* = 7.1 Hz, 3H).

**<sup>13</sup>C NMR (101 MHz, CDCl<sub>3</sub>)** δ 174.54, 173.14, 167.55, 160.89, 136.36, 135.34, 133.44, 131.48, 131.26, 130.80, 130.16, 129.08, 128.86, 128.08, 127.65, 127.48, 126.64, 125.64, 118.41, 116.36, 61.21, 60.97, 60.95, 35.15, 32.76, 28.58, 17.40, 14.27, 14.09.

**HRMS (ESI):** *m/z* calcd for C<sub>31</sub>H<sub>31</sub>N<sub>2</sub>O<sub>5</sub> ([M+H]<sup>+</sup>): 511.2227; found: 511.2233.

**diethyl 3-(2-bromophenyl)-6-methyl-4-oxo-1-phenyl-2,3-diazaspiro[4.5]deca-1,6-diene-7,9-dicarboxylate (3ap).**

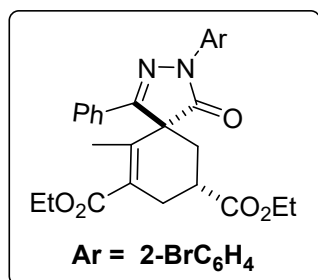

Yellow oil (50 mg, 93% yield)

**<sup>1</sup>H NMR (400 MHz, CDCl<sub>3</sub>)** δ 7.71 (ddd, *J* = 14.3, 8.1, 1.3 Hz, 3H), 7.49 – 7.39 (m, 5H), 7.30 (ddd, *J* = 8.0, 7.2, 2.0 Hz, 1H), 4.33 – 4.25 (m, 2H), 4.13 – 4.05 (m, 2H), 2.87 (dd, *J* = 12.3, 10.5 Hz, 1H), 2.72 – 2.55 (m, 2H), 2.39 – 2.29 (m, 1H), 2.28 – 2.21 (m, 1H), 2.08 (s, 3H), 1.36 (t, *J* = 7.1 Hz, 3H), 1.20 (t, *J* = 7.1 Hz, 3H).

**<sup>13</sup>C NMR (101 MHz, CDCl<sub>3</sub>)** δ 174.59, 173.19, 167.53, 160.89, 136.42, 135.78, 133.86, 131.59, 130.66, 130.45, 130.23, 129.28, 129.01, 128.29, 127.40, 121.73, 60.98, 60.92, 59.80, 35.16, 32.77, 28.67, 17.75, 14.27, 14.11.

**HRMS (ESI):** *m/z* calcd for C<sub>27</sub>H<sub>28</sub>BrN<sub>2</sub>O<sub>5</sub> ([M+H]<sup>+</sup>): 539.1176; found: 539.1172.

**diethyl 6-methyl-4-oxo-1-phenyl-3-(*o*-tolyl)-2,3-diazaspiro[4.5]deca-1,6-diene-7,9-dicarboxylate (3aq).**

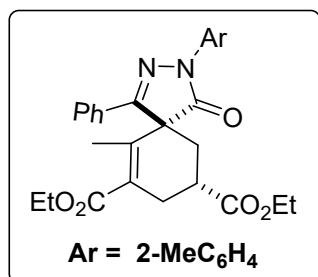

Yellow oil (42 mg, 89% yield)

**<sup>1</sup>H NMR (400 MHz, CDCl<sub>3</sub>)** δ 7.69 (d, *J* = 6.6 Hz, 2H), 7.43 (dd, *J* = 15.3, 7.7 Hz, 3H), 7.39 – 7.35 (m, 1H), 7.34 – 7.27 (m, 3H), 4.29 (qd, *J* = 7.0, 2.3 Hz, 2H), 4.14 – 4.04 (m, 2H), 2.90 (d, *J* = 12.7 Hz, 1H), 2.73 – 2.59 (m, 2H), 2.32 (d, *J* = 19.7 Hz, 4H), 2.20 (d, *J* = 13.8 Hz, 1H), 2.04 (s, 3H), 1.36 (t, *J* = 7.1 Hz, 3H), 1.20 (t, *J* = 7.1 Hz, 3H).

**<sup>13</sup>C NMR (101 MHz, CDCl<sub>3</sub>)** δ 174.79, 173.23, 167.51, 160.83, 136.61, 135.47, 135.09, 131.68, 131.30,

130.57, 130.04, 129.00, 128.83, 127.30, 126.68, 126.58, 60.99, 60.91, 59.88, 35.13, 32.91, 28.67, 18.58, 17.58, 14.27, 14.10.

**HRMS (ESI):**  $m/z$  calcd for  $C_{28}H_{31}N_2O_5$  ( $[M+H]^+$ ): 475.2227; found: 475.2230.

**diethyl 3-(3,5-dimethylphenyl)-6-methyl-4-oxo-1-phenyl-2,3-diazaspiro[4.5]deca-1,6-diene-7,9-dicarboxylate (3ar).**

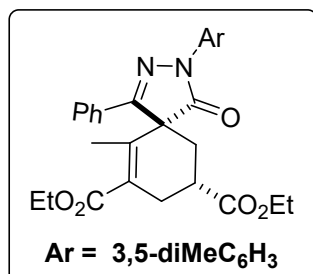

White solid (melting point 140-143°C) (44 mg, 90% yield)

**<sup>1</sup>H NMR (400 MHz, CDCl<sub>3</sub>)**  $\delta$  7.72 (d,  $J$  = 6.5 Hz, 2H), 7.64 (s, 2H), 7.45 (d,  $J$  = 7.2 Hz, 3H), 6.89 (s, 1H), 4.28 (dd,  $J$  = 12.7, 6.3 Hz, 2H), 4.08 (dd,  $J$  = 14.0, 7.0 Hz, 2H), 2.87 (d,  $J$  = 15.4 Hz, 1H), 2.72 – 2.57 (m, 2H), 2.37 (s, 6H), 2.33 – 2.26 (m, 1H), 2.16 (d,  $J$  = 13.8 Hz, 1H), 1.93 (s, 3H), 1.35 (t,  $J$  = 7.0 Hz, 3H), 1.19 (t,  $J$  = 7.0 Hz, 3H).

**<sup>13</sup>C NMR (101 MHz, CDCl<sub>3</sub>)**  $\delta$  174.32, 173.19, 167.58, 160.64, 138.76, 137.63, 136.51, 131.59, 130.68, 130.02, 129.03, 127.46, 127.43, 116.94, 61.12, 60.95, 60.92, 35.16, 32.72, 28.60, 21.53, 17.31, 14.28, 14.09.

**HRMS (ESI):**  $m/z$  calcd for  $C_{29}H_{33}N_2O_5$  ( $[M+H]^+$ ): 489.2384; found: 489.2385.

**diethyl 1-([1,1'-biphenyl]-4-yl)-6-methyl-4-oxo-3-phenyl-2,3-diazaspiro[4.5]deca-1,6-diene-7,9-dicarboxylate (3as).**

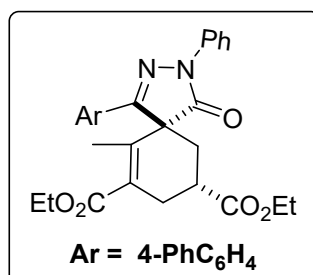

Yellow oil (42 mg, 78% yield)

**<sup>1</sup>H NMR (400 MHz, CDCl<sub>3</sub>)**  $\delta$  8.05 (d,  $J$  = 7.8 Hz, 2H), 7.82 (d,  $J$  = 8.4 Hz, 2H), 7.68 (d,  $J$  = 8.4 Hz, 2H), 7.65 – 7.61 (m, 2H), 7.50 – 7.43 (m, 4H), 7.39 (t,  $J$  = 7.3 Hz, 1H), 7.28 – 7.21 (m, 1H), 4.29 (qd,  $J$  = 7.1, 1.2 Hz, 2H), 4.10 (q,  $J$  = 7.1 Hz, 2H), 2.92 (q,  $J$  = 9.9 Hz, 1H), 2.77 – 2.69 (m, 2H), 2.39 – 2.30 (m, 1H), 2.26 – 2.19 (m, 1H), 1.95 (s, 3H), 1.36 (t,  $J$  = 7.1 Hz, 3H), 1.20 (t,  $J$  = 7.1 Hz, 3H).

**<sup>13</sup>C NMR (101 MHz, CDCl<sub>3</sub>)**  $\delta$  174.37, 173.15, 167.59, 160.39, 143.42, 139.87, 137.86, 136.49, 130.31, 130.12, 129.00, 128.06, 127.83, 127.64, 127.08, 125.64, 119.07, 61.11, 61.00, 60.96, 35.23, 32.88, 28.61, 17.42, 14.29, 14.11.

**HRMS (ESI):**  $m/z$  calcd for  $C_{33}H_{33}N_2O_5$  ( $[M+H]^+$ ): 537.2384; found: 537.2388.

**diethyl 1-(3,4-dichlorophenyl)-6-methyl-4-oxo-3-phenyl-2,3-diazaspiro[4.5]deca-1,6-diene-7,9-dicarboxylate (3at).**



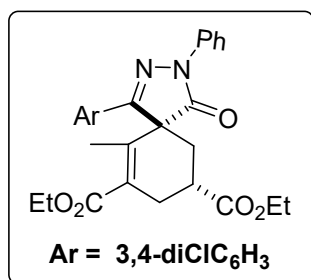

Yellow oil (47 mg, 89% yield)

<sup>1</sup>H NMR (400 MHz, CDCl<sub>3</sub>) δ 7.99 (d, *J* = 7.9 Hz, 2H), 7.94 (d, *J* = 1.6 Hz, 1H), 7.52 (dd, *J* = 8.1, 5.0 Hz, 2H), 7.45 (t, *J* = 8.0 Hz, 2H), 7.26 (t, *J* = 7.4 Hz, 1H), 4.29 (q, *J* = 7.0 Hz, 2H), 4.12 (q, *J* = 7.1 Hz, 2H), 2.88 (dd, *J* = 17.7, 5.0 Hz, 1H), 2.72 (ddd, *J* = 17.7, 10.6, 2.3 Hz, 1H), 2.60 (ddd, *J* = 15.7, 9.7, 4.5 Hz, 1H), 2.37 – 2.28 (m, 1H), 2.17 (dd, *J* = 14.0, 2.3 Hz, 1H), 1.88 (s, 3H), 1.36 (t, *J* = 7.1 Hz, 3H), 1.22 (t, *J* = 7.1 Hz, 3H).

<sup>13</sup>C NMR (101 MHz, CDCl<sub>3</sub>) δ 174.02, 172.80, 167.38, 158.25, 137.56, 135.27, 135.13, 133.68, 131.33, 131.05, 130.78, 129.21, 129.06, 126.14, 125.91, 119.07, 61.14, 61.07, 60.73, 35.23, 32.82, 28.42, 17.28, 14.25, 14.11.

HRMS (ESI): *m/z* calcd for C<sub>27</sub>H<sub>27</sub>Cl<sub>2</sub>N<sub>2</sub>O<sub>5</sub> ([M+H]<sup>+</sup>): 529.1292; found: 529.1290.

diethyl 1-(4-cyanophenyl)-6-methyl-4-oxo-3-phenyl-2,3-diazaspiro[4.5]deca-1,6-diene-7,9-dicarboxylate (3au).

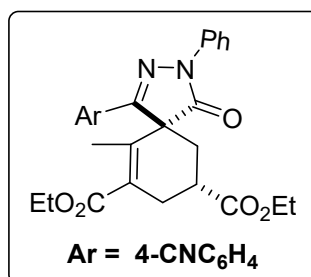

Yellow oil (16 mg, 33% yield)

<sup>1</sup>H NMR (400 MHz, CDCl<sub>3</sub>) δ 7.98 (d, *J* = 7.8 Hz, 2H), 7.87 (d, *J* = 8.5 Hz, 2H), 7.75 (d, *J* = 8.5 Hz, 2H), 7.46 (t, *J* = 8.0 Hz, 2H), 7.27 (t, *J* = 7.4 Hz, 1H), 4.30 (tt, *J* = 7.2, 3.6 Hz, 2H), 4.13 – 4.08 (m, 2H), 2.89 (dd, *J* = 17.9, 5.0 Hz, 1H), 2.73 (ddd, *J* = 17.9, 10.5, 2.3 Hz, 1H), 2.56 (ddd, *J* = 15.7, 11.3, 4.5 Hz, 1H), 2.40 – 2.29 (m, 1H), 2.17 (dd, *J* = 14.0, 2.3 Hz, 1H), 1.89 (s, 3H), 1.36 (t, *J* = 7.1 Hz, 3H), 1.21 (t, *J* = 7.1 Hz, 3H).

<sup>13</sup>C NMR (101 MHz, CDCl<sub>3</sub>) δ 174.09, 172.74, 167.38, 158.56, 137.50, 135.55, 135.45, 132.82, 130.81, 129.12, 127.79, 126.09, 119.12, 118.09, 114.19, 61.19, 61.15, 60.71, 35.33, 32.81, 28.49, 17.33, 14.27, 14.11.

HRMS (ESI): *m/z* calcd for C<sub>28</sub>H<sub>28</sub>N<sub>3</sub>O<sub>5</sub> ([M+H]<sup>+</sup>): 486.2023; found: 486.2025.

diethyl 1-(4-chlorophenyl)-6-methyl-4-oxo-3-phenyl-2,3-diazaspiro[4.5]deca-1,6-diene-7,9-dicarboxylate (3av).

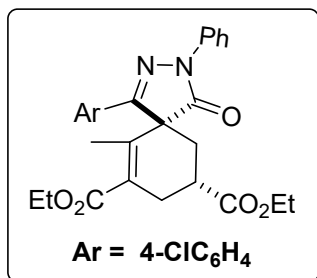

Yellow oil (28 mg, 57% yield)

**<sup>1</sup>H NMR (400 MHz, CDCl<sub>3</sub>)** δ 8.00 (d, *J* = 7.8 Hz, 2H), 7.68 (d, *J* = 8.6 Hz, 2H), 7.44 (dd, *J* = 12.4, 6.3 Hz, 4H), 7.28 – 7.21 (m, 1H), 4.29 (tt, *J* = 7.1, 3.6 Hz, 2H), 4.10 (q, *J* = 7.1 Hz, 2H), 2.92 – 2.83 (m, 1H), 2.75 – 2.65 (m, 1H), 2.60 (ddd, *J* = 15.7, 9.6, 4.3 Hz, 1H), 2.36 – 2.27 (m, 1H), 2.16 (dd, *J* = 13.9, 2.1 Hz, 1H), 1.90 (s, 3H), 1.35 (t, *J* = 7.1 Hz, 3H), 1.21 (t, *J* = 7.1 Hz, 3H).

**<sup>13</sup>C NMR (101 MHz, CDCl<sub>3</sub>)** δ 174.17, 172.97, 167.48, 159.56, 137.71, 136.97, 135.95, 130.42, 129.96, 129.39, 129.02, 128.64, 125.76, 119.05, 61.07, 61.02, 60.95, 35.20, 32.83, 28.52, 17.32, 14.27, 14.11.

**HRMS (ESI):** *m/z* calcd for C<sub>27</sub>H<sub>28</sub>ClN<sub>2</sub>O<sub>5</sub> ([M+H]<sup>+</sup>): 495.1681; found: 495.1682.

**diethyl 6-methyl-1-(naphthalen-2-yl)-4-oxo-3-phenyl-2,3-diazaspiro[4.5]deca-1,6-diene-7,9-dicarboxylate (3aw).**

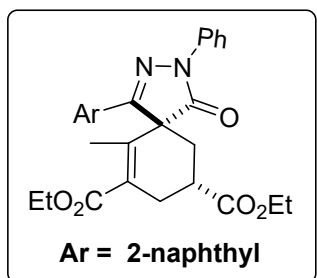

Yellow oil (13 mg, 25% yield)

**<sup>1</sup>H NMR (400 MHz, CDCl<sub>3</sub>)** δ 8.17 (s, 1H), 8.07 (d, *J* = 7.8 Hz, 2H), 7.92 (s, 2H), 7.90 – 7.85 (m, 2H), 7.60 – 7.53 (m, 2H), 7.47 (t, *J* = 8.0 Hz, 2H), 7.29 – 7.23 (m, 1H), 4.37 – 4.28 (m, 2H), 4.05 (q, *J* = 7.1 Hz, 2H), 2.92 (d, *J* = 13.2 Hz, 1H), 2.80 – 2.66 (m, 2H), 2.40 – 2.32 (m, 1H), 2.26 (d, *J* = 14.0 Hz, 1H), 1.97 (s, 3H), 1.38 (t, *J* = 7.1 Hz, 3H), 1.16 (t, *J* = 7.1 Hz, 3H).

**<sup>13</sup>C NMR (101 MHz, CDCl<sub>3</sub>)** δ 174.42, 173.09, 167.76, 160.60, 137.90, 136.05, 134.20, 132.92, 130.37, 129.05, 129.00, 128.96, 128.94, 127.85, 127.68, 127.62, 126.95, 125.70, 124.15, 119.15, 61.12, 61.02, 35.18, 33.07, 28.55, 17.49, 14.34, 14.10.

**HRMS (ESI):** *m/z* calcd for C<sub>31</sub>H<sub>31</sub>N<sub>2</sub>O<sub>5</sub> ([M+H]<sup>+</sup>): 511.2227; found: 511.2229.

**diethyl 3-benzyl-6-methyl-4-oxo-1-phenyl-2,3-diazaspiro[4.5]deca-1,6-diene-7,9-dicarboxylate (3ax).**

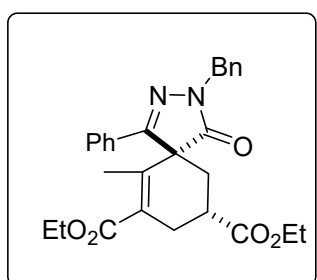

Yellow oil (31.1 mg, 66% yield)

**<sup>1</sup>H NMR (400 MHz, CDCl<sub>3</sub>)** δ 7.58 (d, *J* = 6.8 Hz, 2H), 7.42 – 7.29 (m, 8H), 4.97 (q, *J* = 15.0 Hz, 2H), 4.25 (tt, *J* = 16.2, 8.0 Hz, 2H), 4.07 (q, *J* = 7.1 Hz, 2H), 2.84 (d, *J* = 15.5 Hz, 1H), 2.69 – 2.51 (m, 2H), 2.21 (t, *J* = 12.9 Hz, 1H), 2.04 (d, *J* = 12.4 Hz, 1H), 1.79 (s, 3H), 1.34 (t, *J* = 7.1 Hz, 3H), 1.18 (t, *J* = 7.1 Hz, 3H).

**<sup>13</sup>C NMR (101 MHz, CDCl<sub>3</sub>)** δ 175.69, 173.27, 167.52, 160.44, 136.82, 136.31, 131.72, 130.36, 129.69, 128.89, 128.69, 128.22, 127.83, 127.21, 60.91, 60.85, 59.57, 48.51, 35.05, 32.32, 28.58, 17.22, 14.26, 14.08.

**HRMS (ESI):** *m/z* calcd for C<sub>28</sub>H<sub>31</sub>N<sub>2</sub>O<sub>5</sub> ([M+Na]<sup>+</sup>): 497.2047; found: 497.2047.

**diethyl 3,6-dimethyl-4-oxo-1-phenyl-2,3-diazaspiro[4.5]deca-1,6-diene-7,9-dicarboxylate (3ay).**

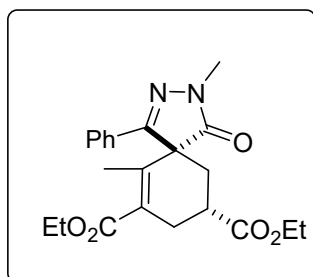

Yellow oil (20 mg, 50% yield)

**<sup>1</sup>H NMR (400 MHz, CDCl<sub>3</sub>)** δ 7.61 (d, *J* = 7.4 Hz, 2H), 7.45 – 7.37 (m, 3H), 4.27 (dd, *J* = 13.6, 6.6 Hz, 2H), 4.07 (q, *J* = 7.1 Hz, 2H), 3.46 (s, 3H), 2.85 (d, *J* = 14.4 Hz, 1H), 2.67 – 2.51 (m, 2H), 2.17 (t, *J* = 12.9 Hz, 1H), 2.03 (d, *J* = 13.0 Hz, 1H), 1.86 (s, 3H), 1.34 (t, *J* = 7.1 Hz, 3H), 1.19 (t, *J* = 7.1 Hz, 3H).

**<sup>13</sup>C NMR (101 MHz, CDCl<sub>3</sub>)** δ 175.83, 173.27, 167.55, 160.40, 136.69, 131.77, 130.42, 129.79, 129.00, 127.16, 60.91, 60.87, 59.63, 35.08, 32.47, 31.78, 28.64, 17.25, 14.27, 14.10.

**HRMS (ESI):** *m/z* calcd for C<sub>22</sub>H<sub>27</sub>N<sub>2</sub>O<sub>5</sub> ([M+Na]<sup>+</sup>): 421.1734; found: 421.1734.

## 7. Spectra

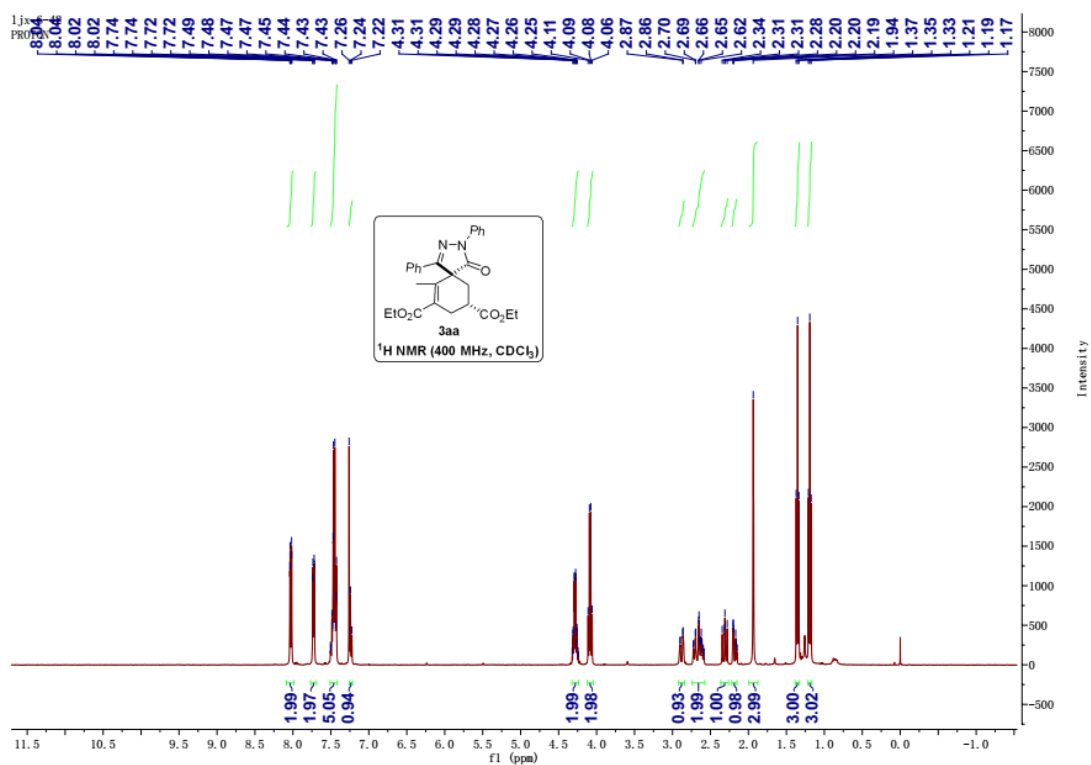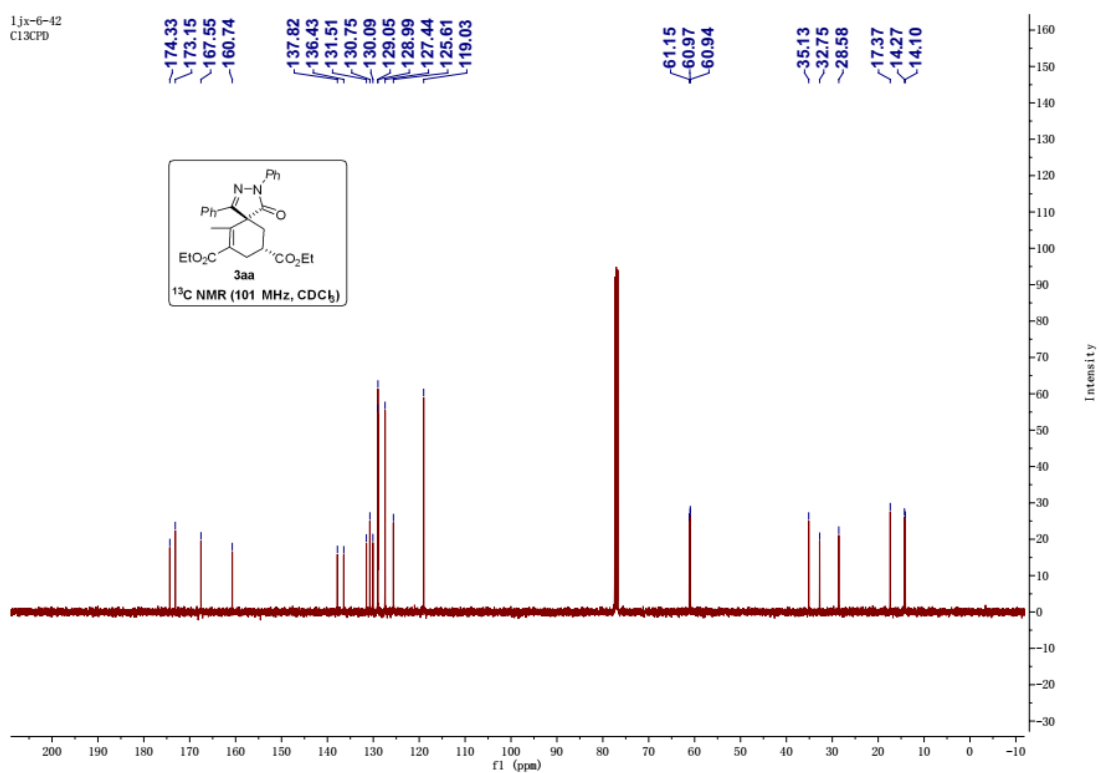

ljx-5-174  
test

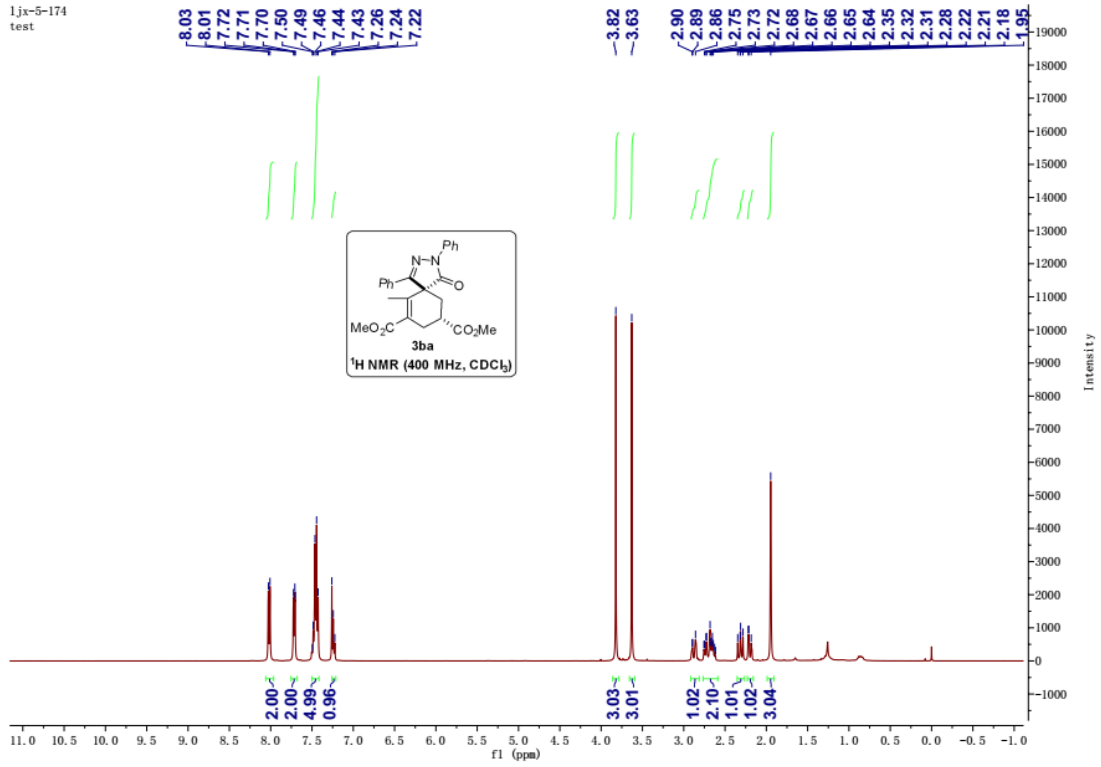

ljx-5-174  
test

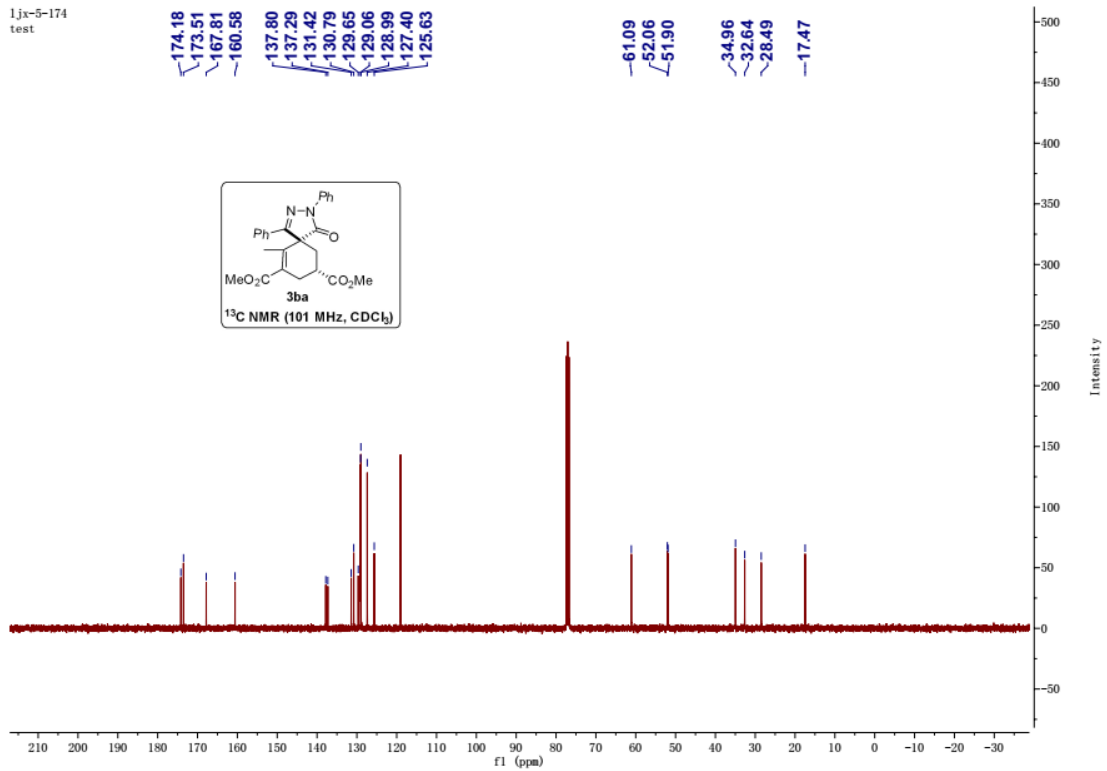

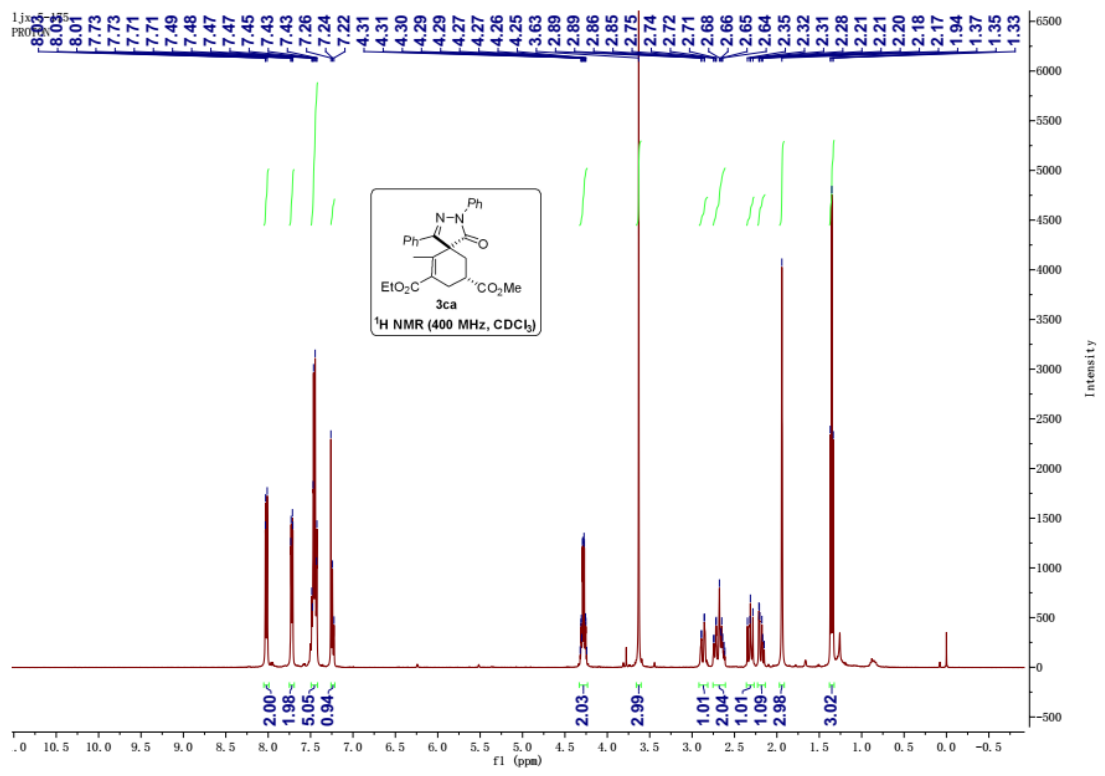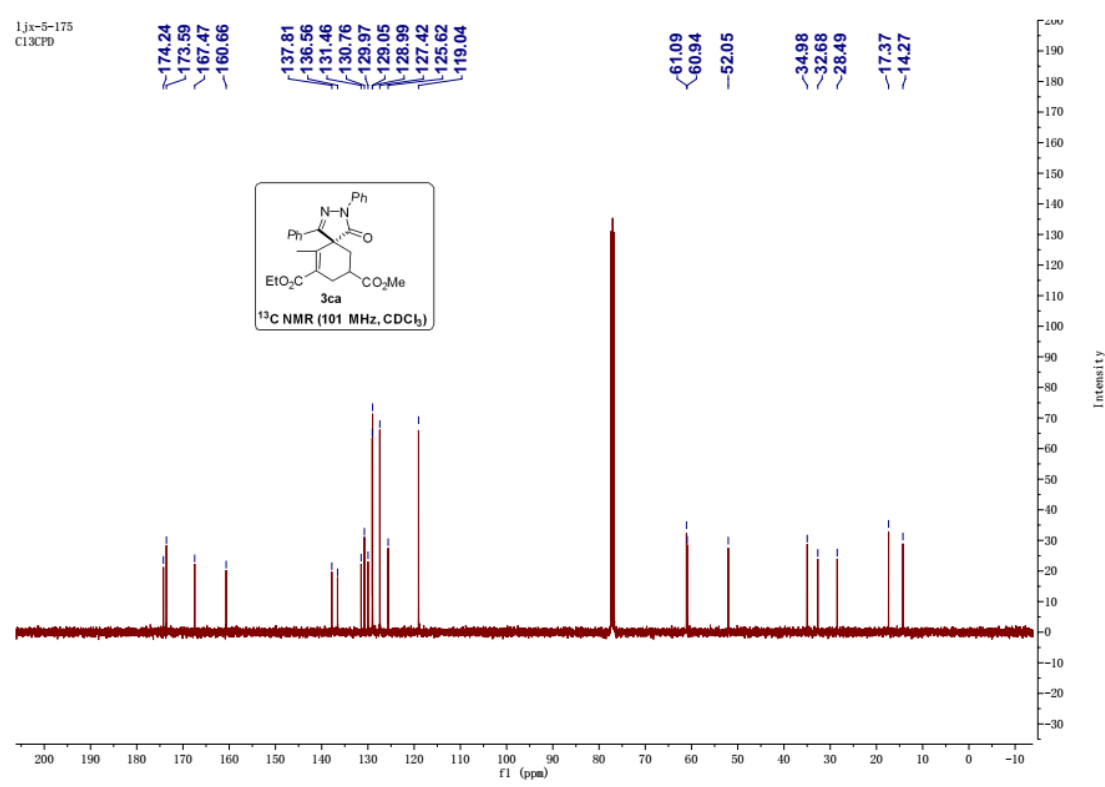

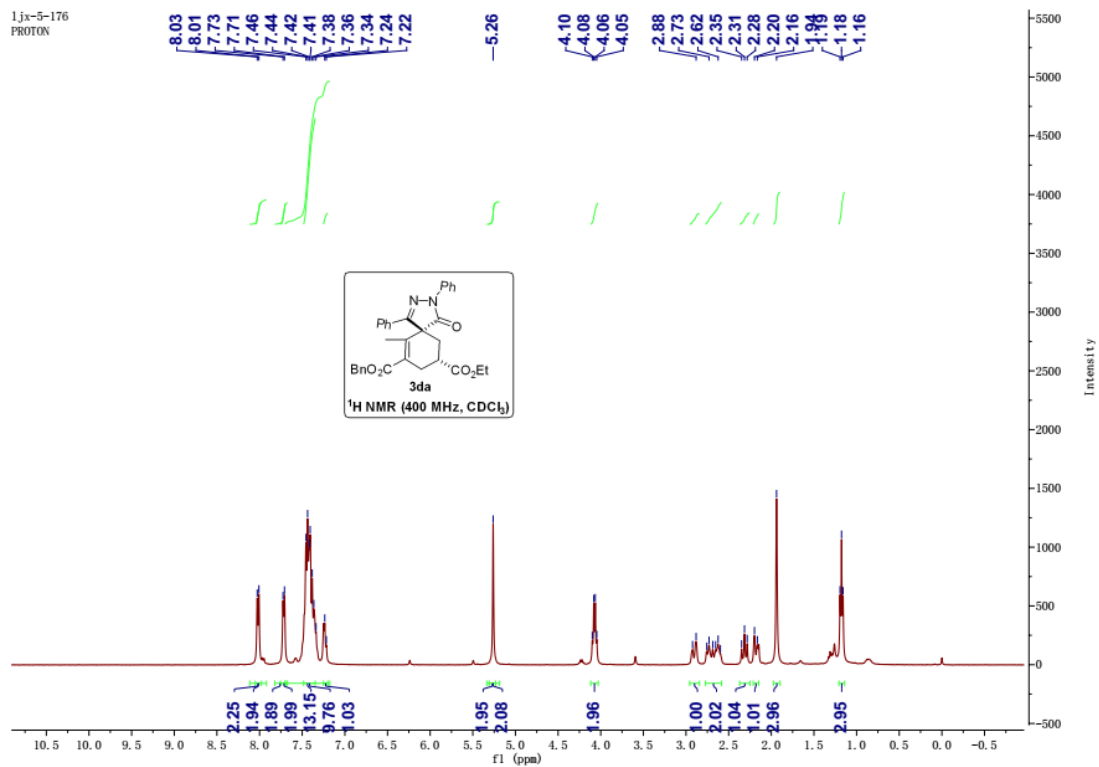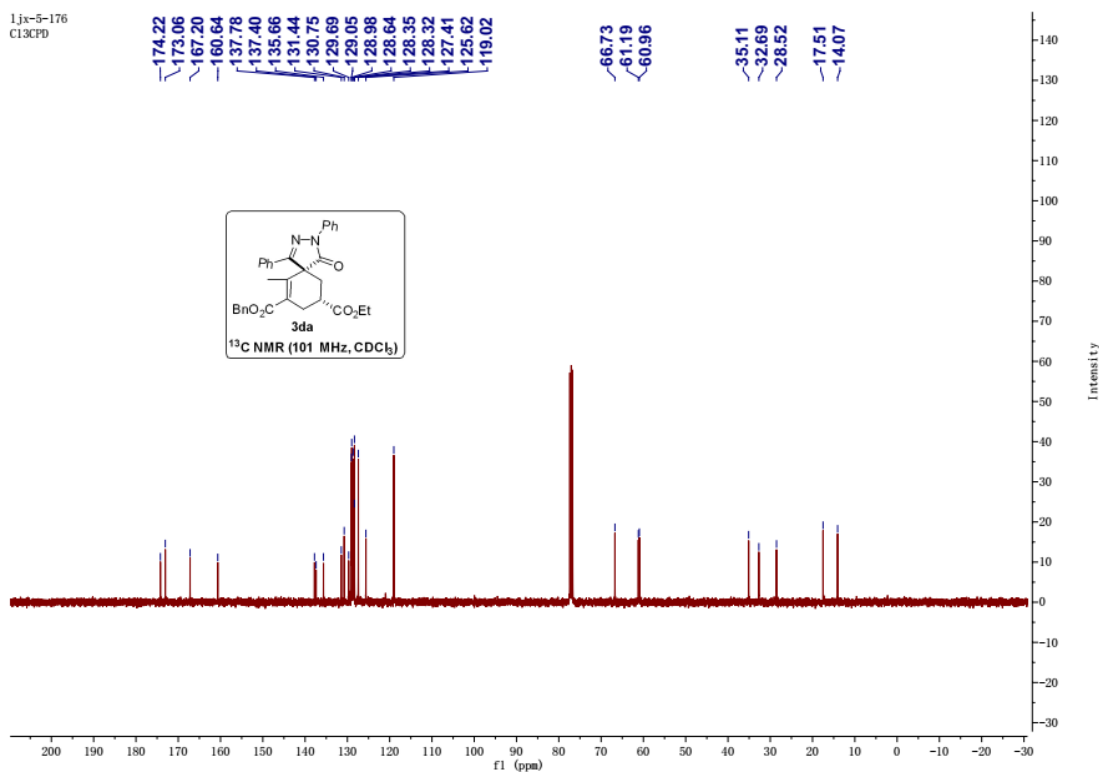

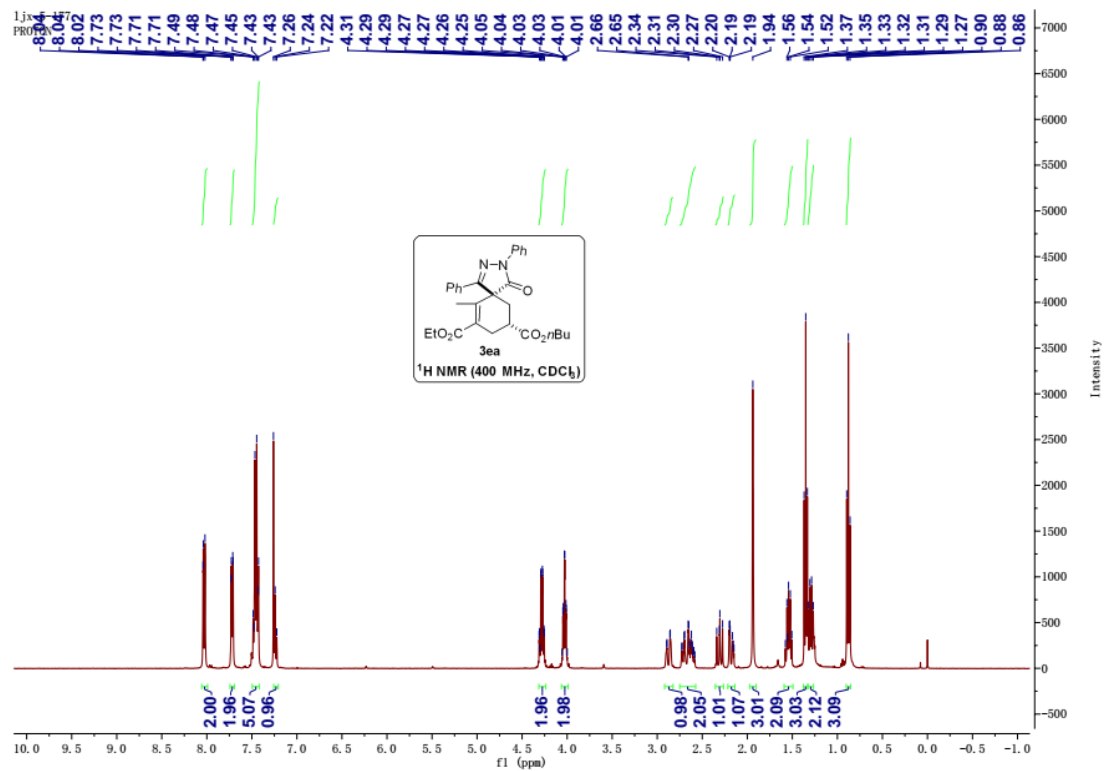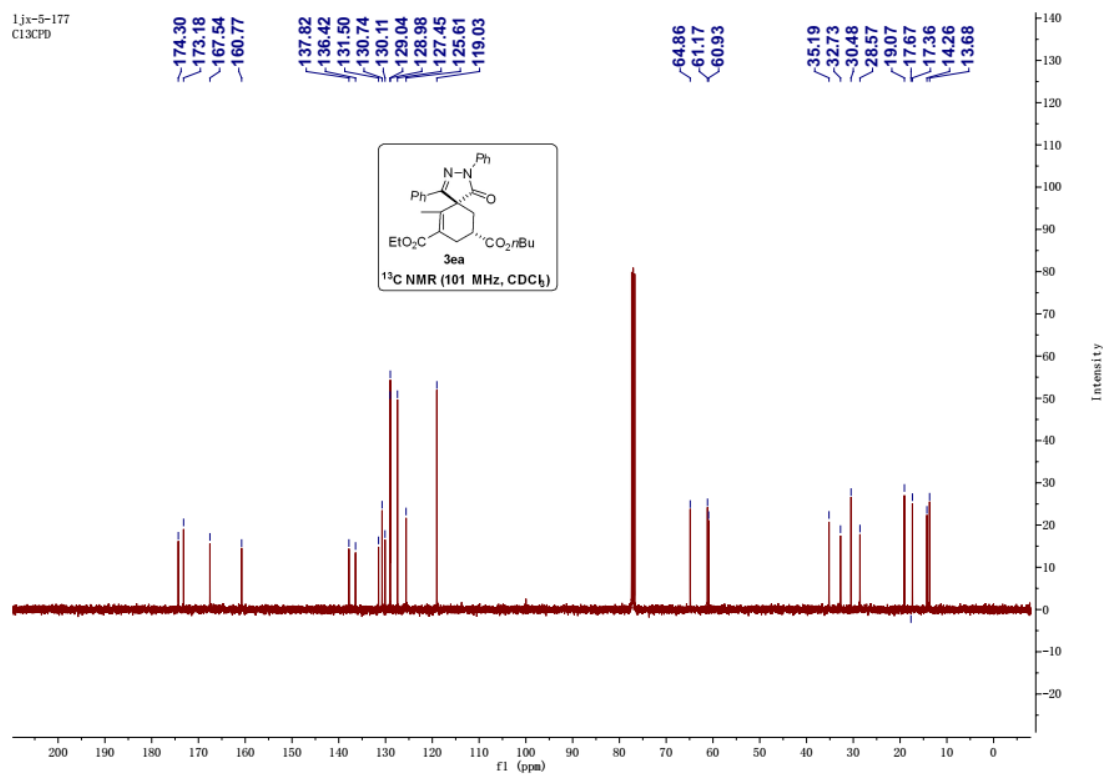



ljx-5-178  
test

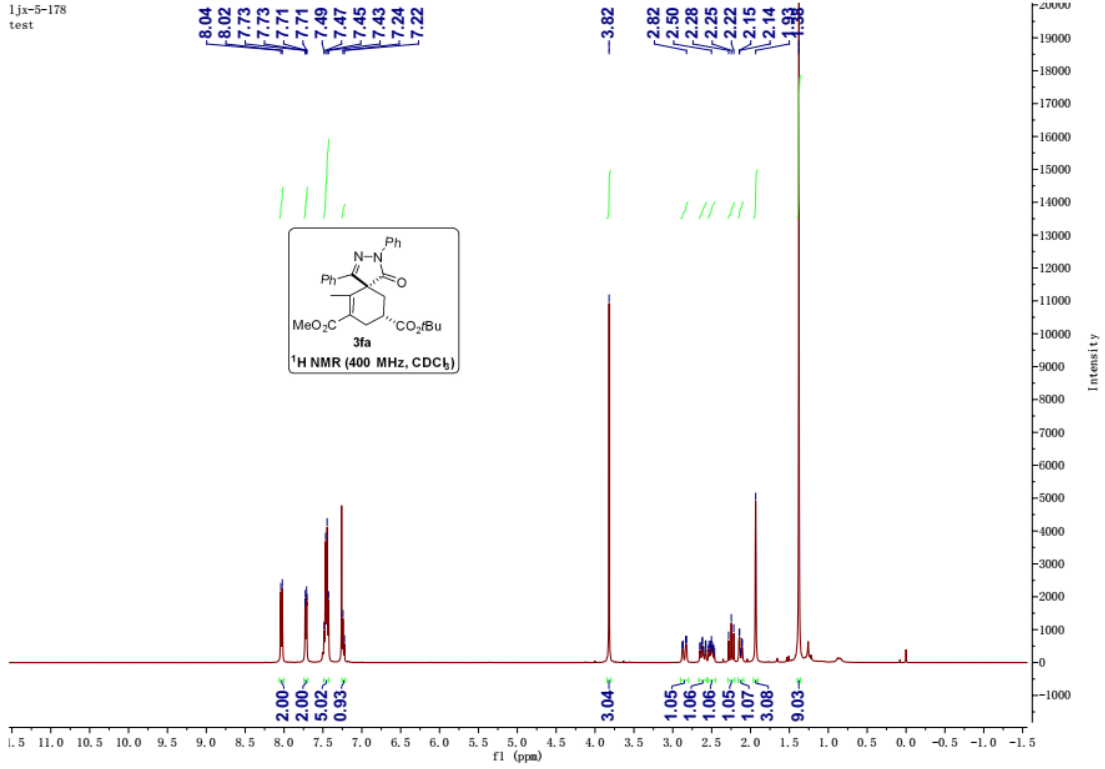

ljx-5-178  
test

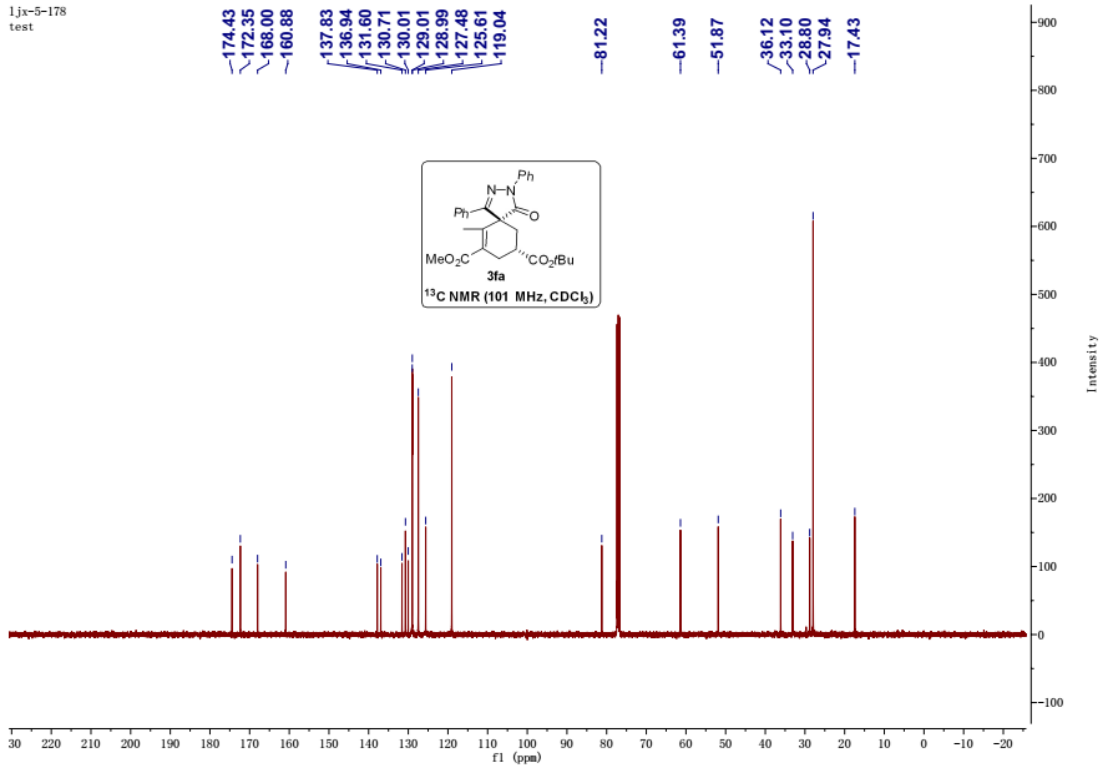

1jx-10-153  
PROTON

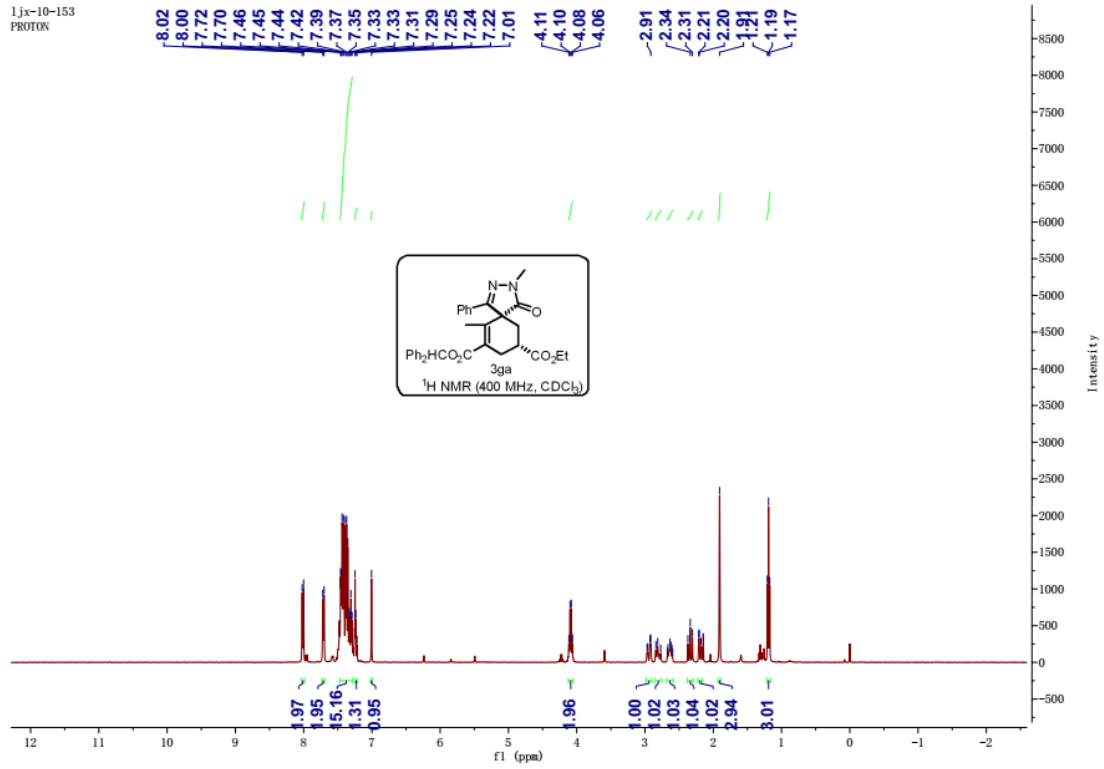

1jx-10-153  
C13CPD

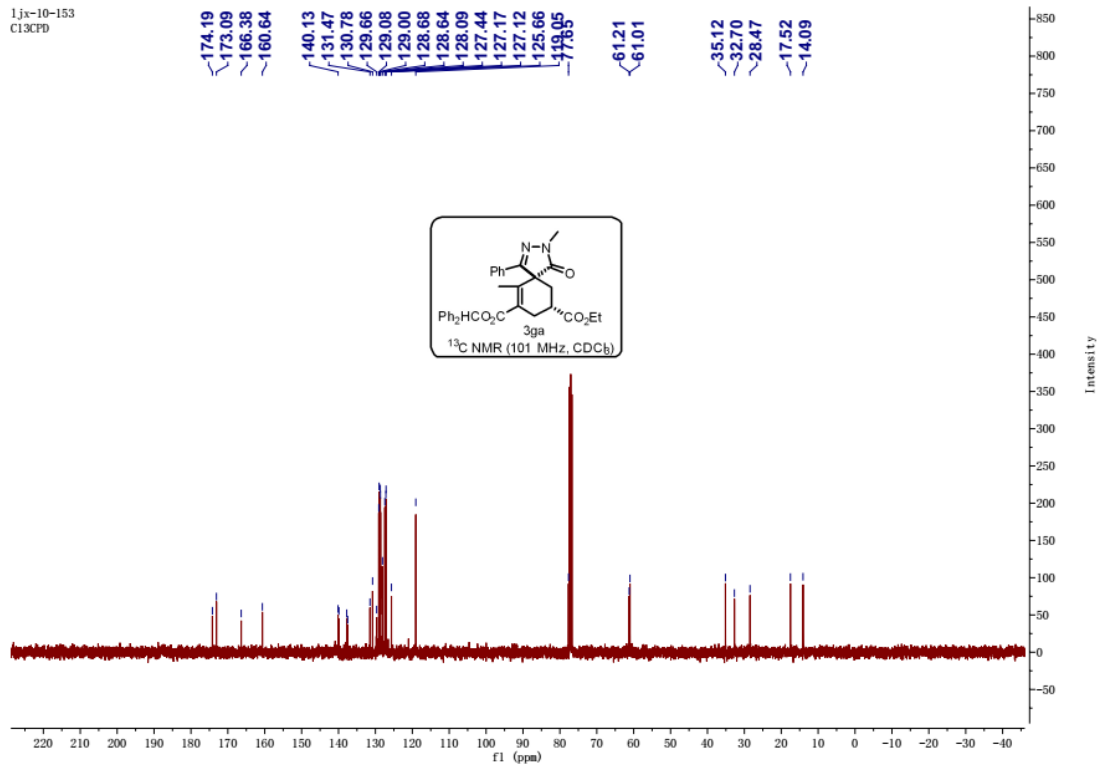

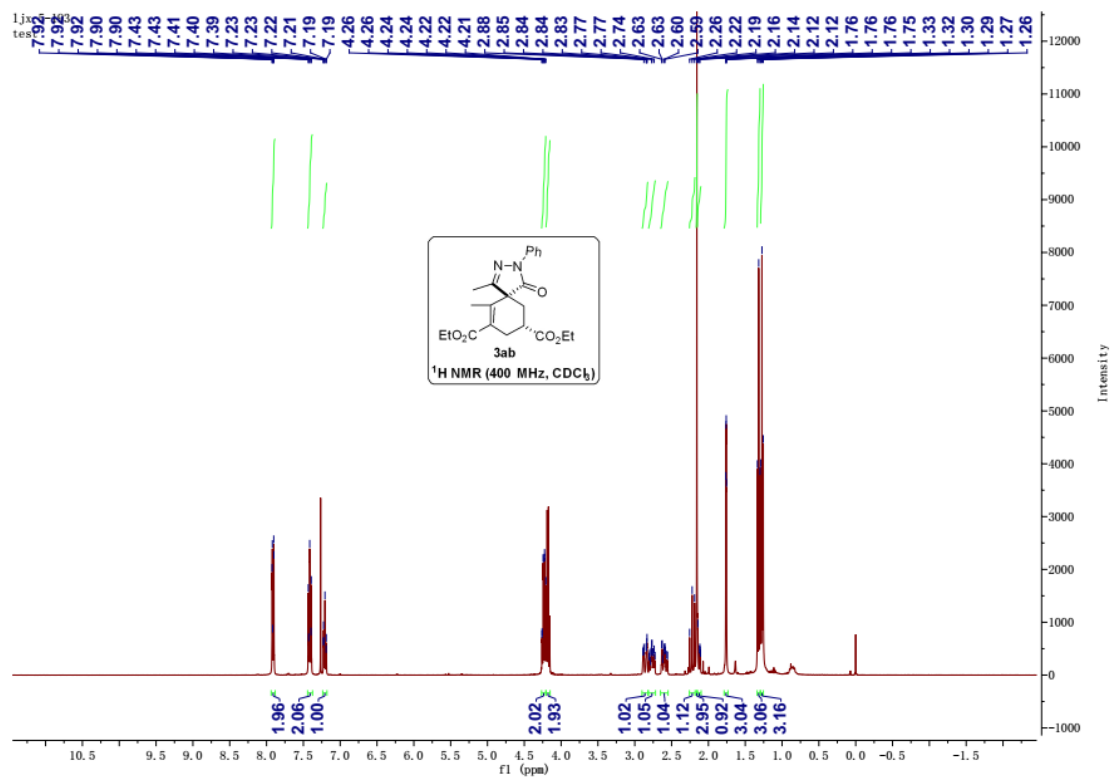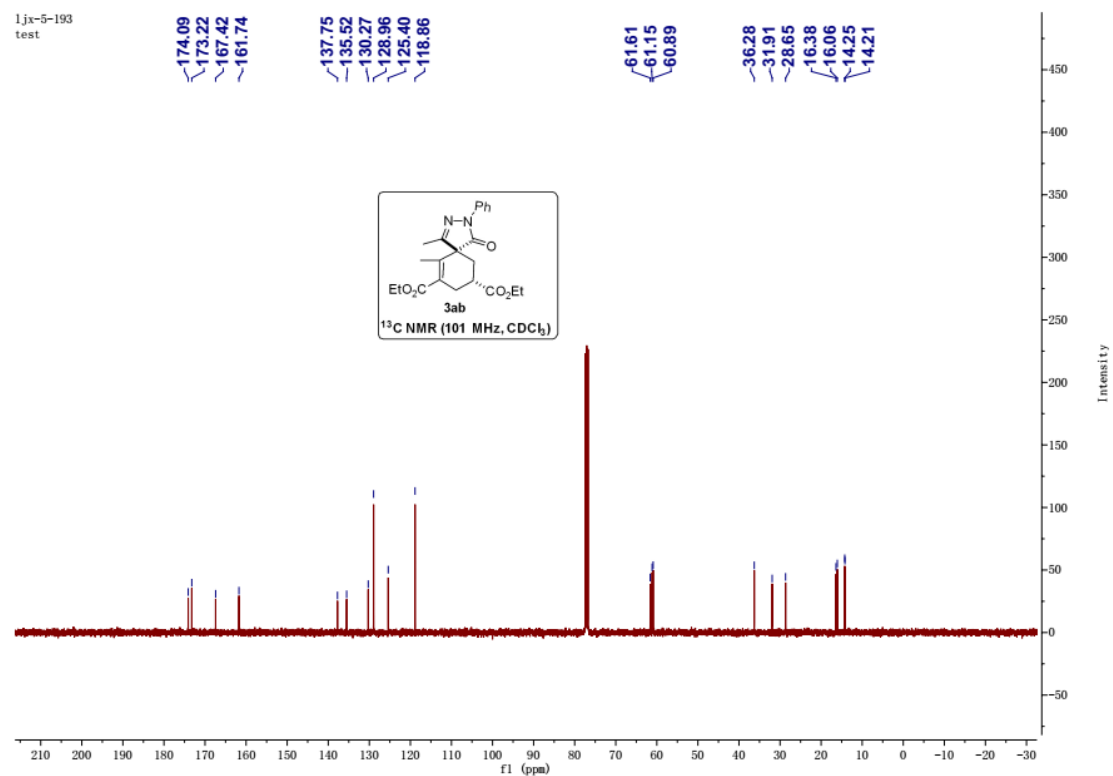

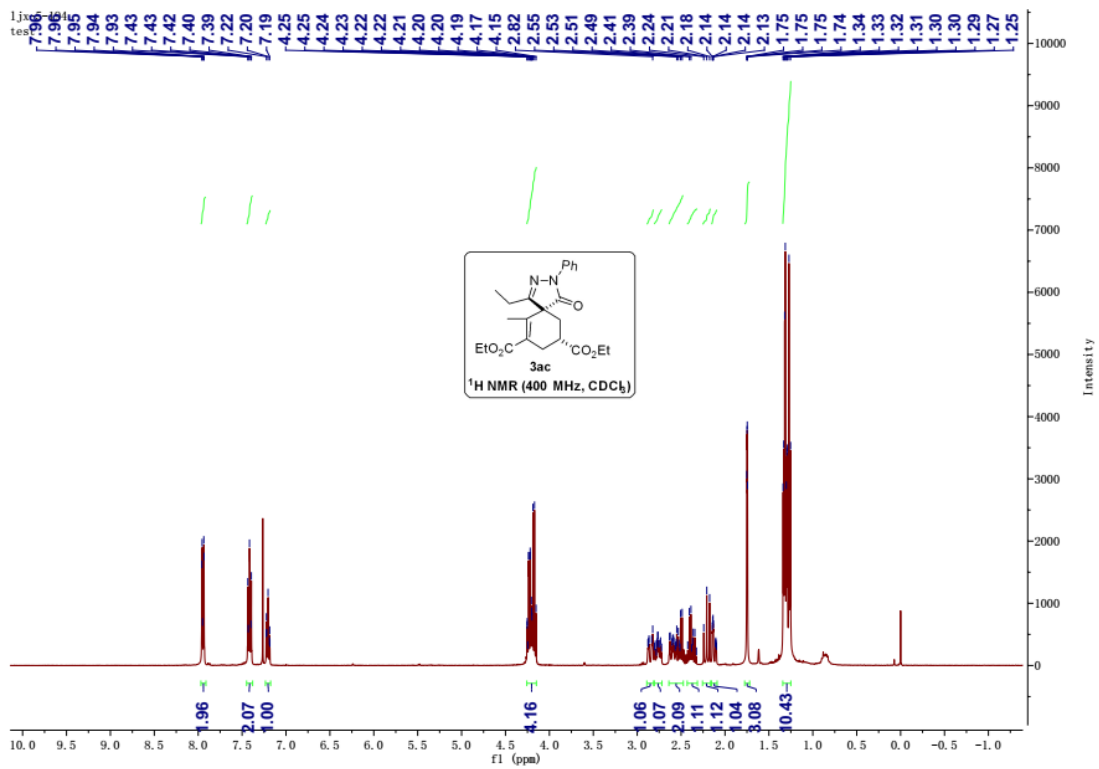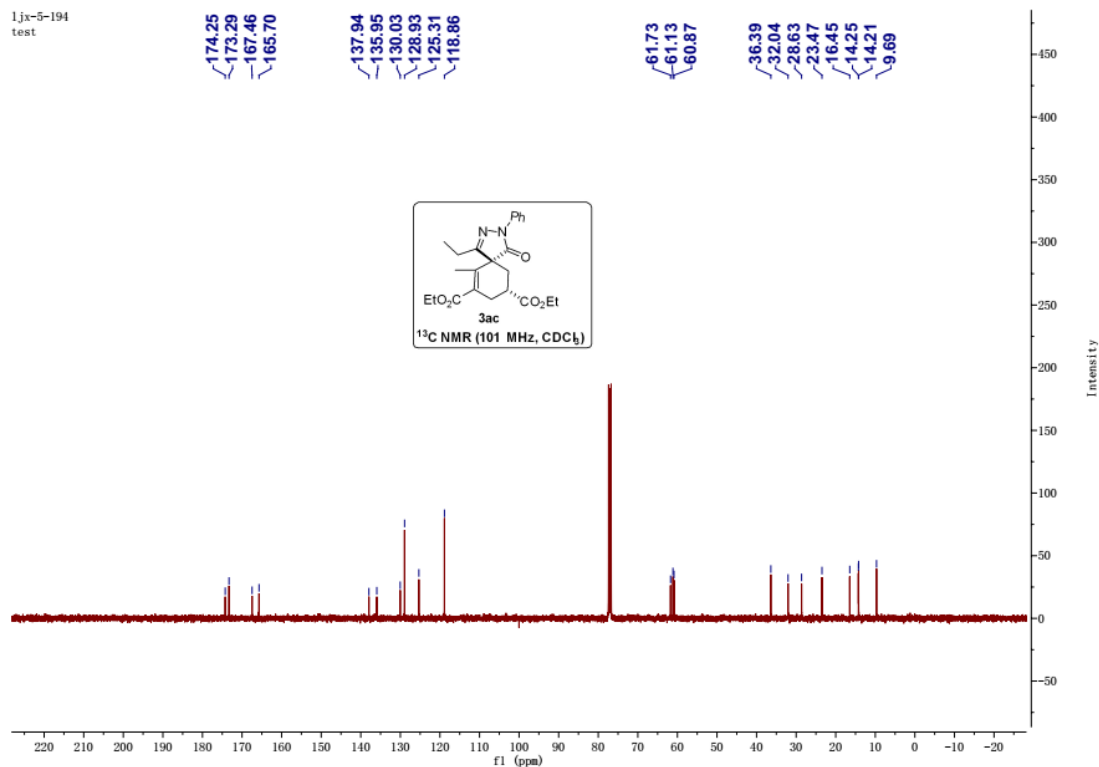

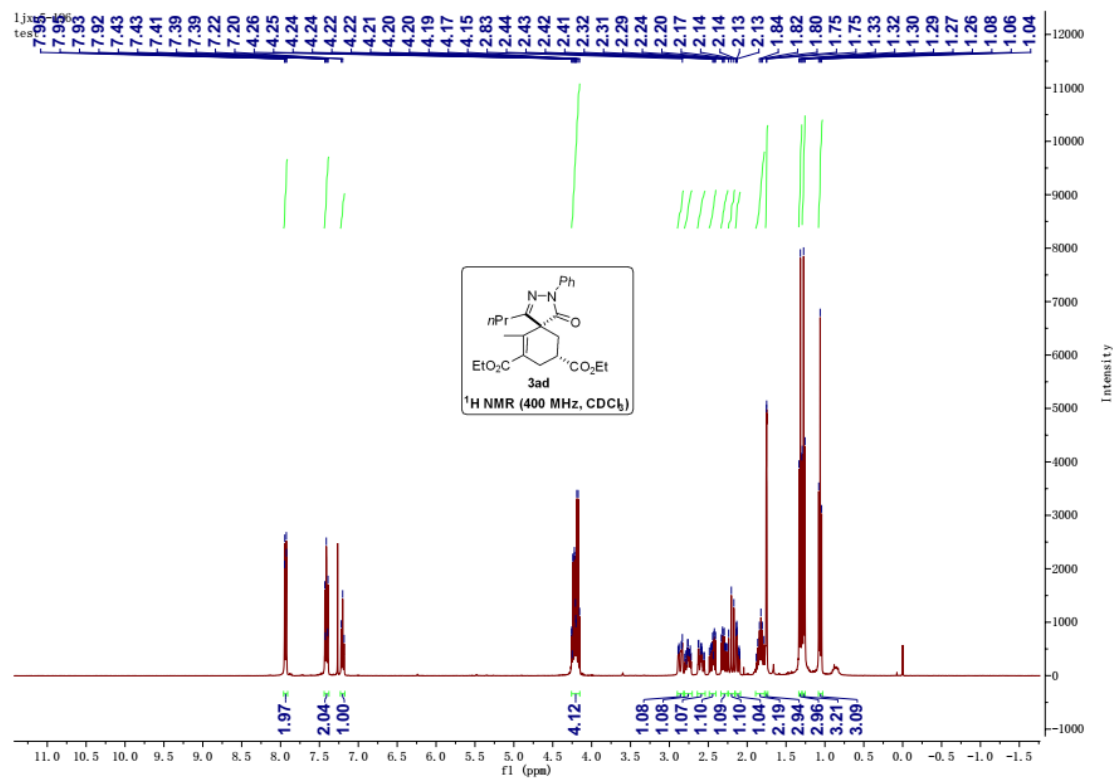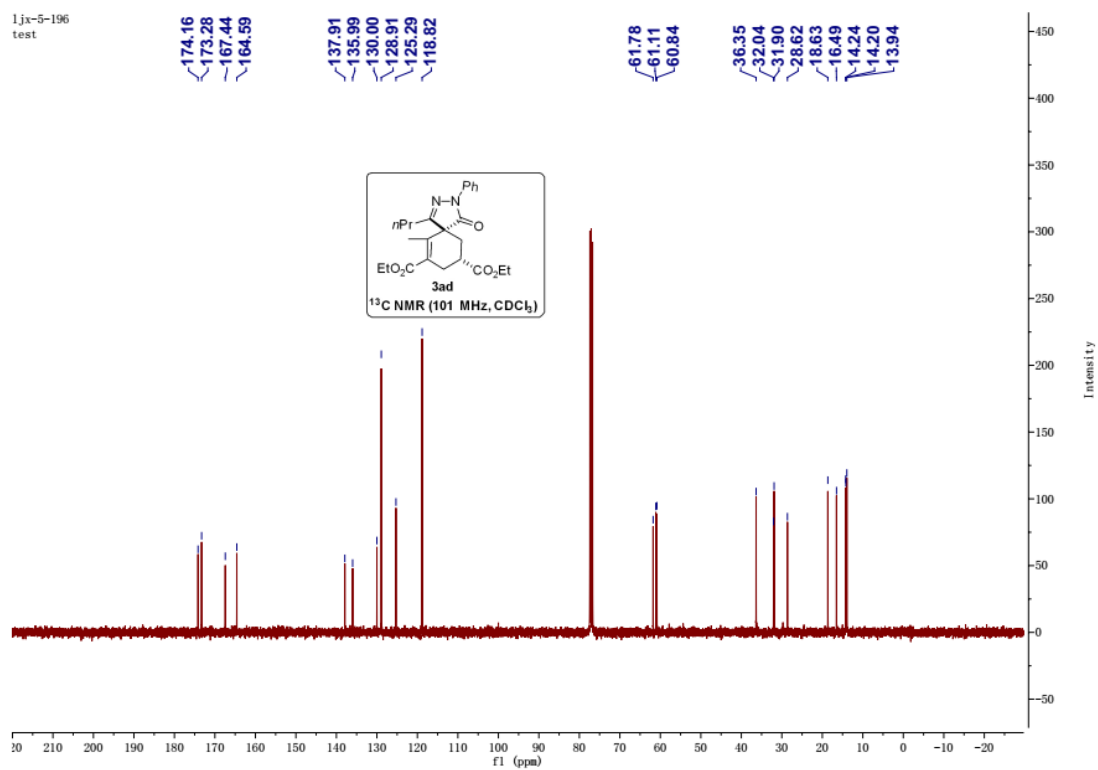

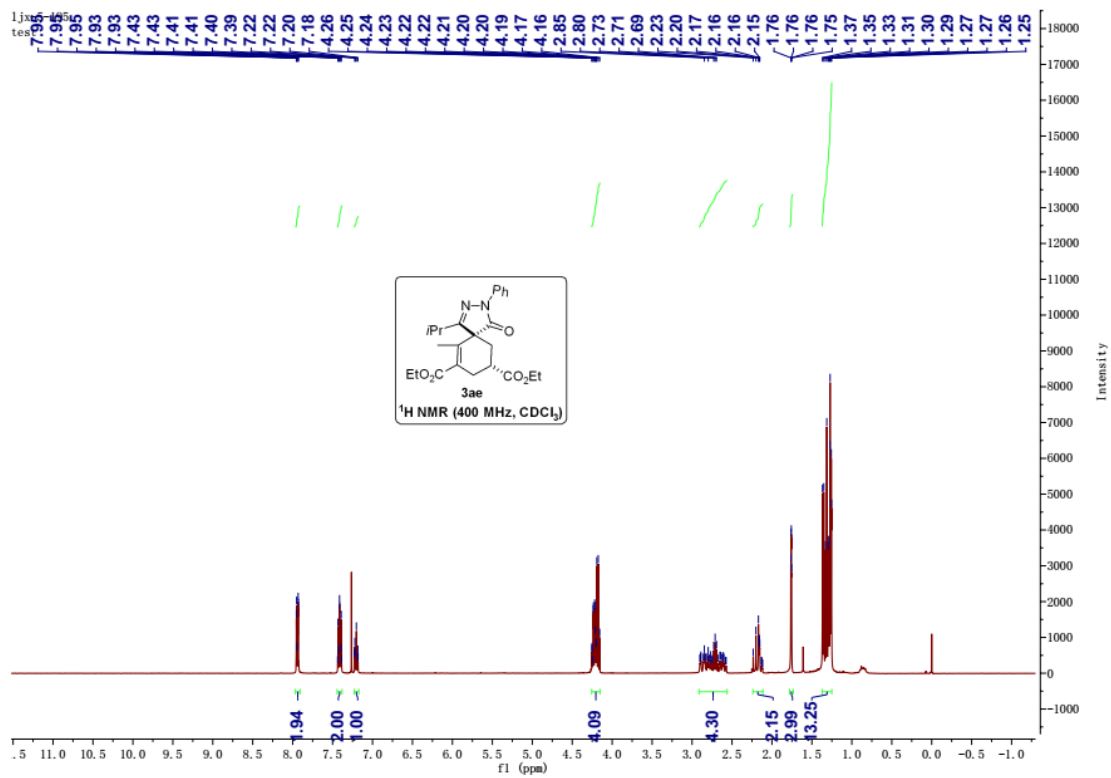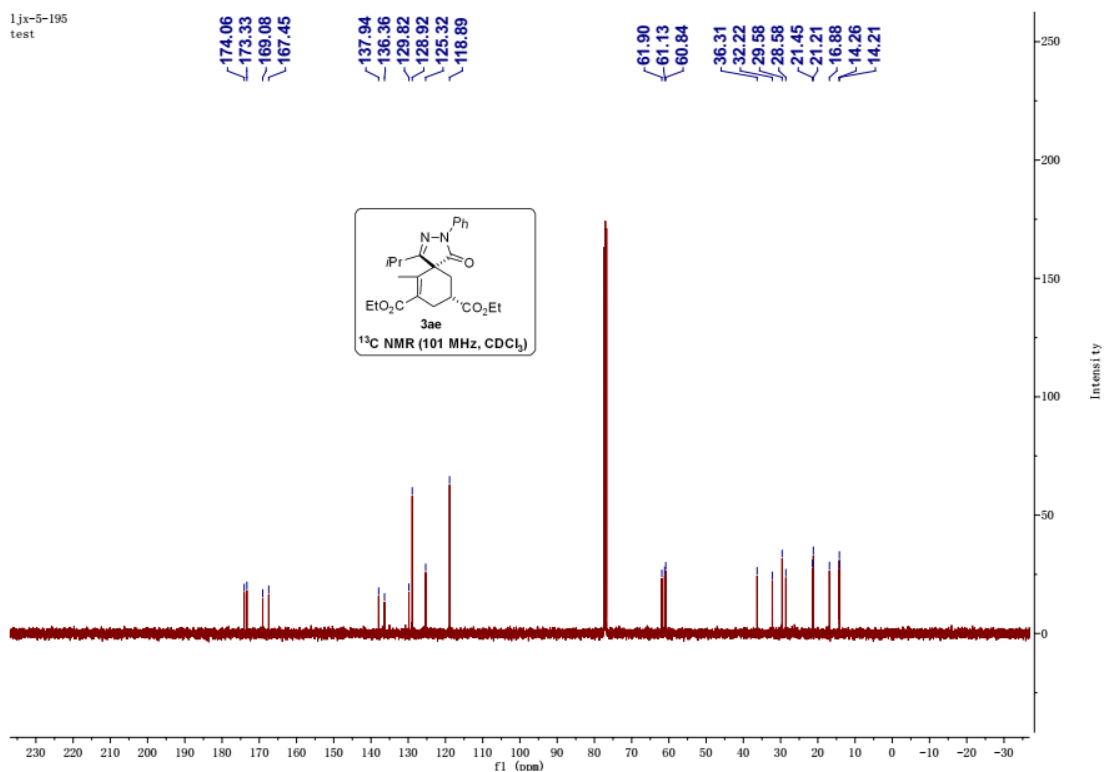

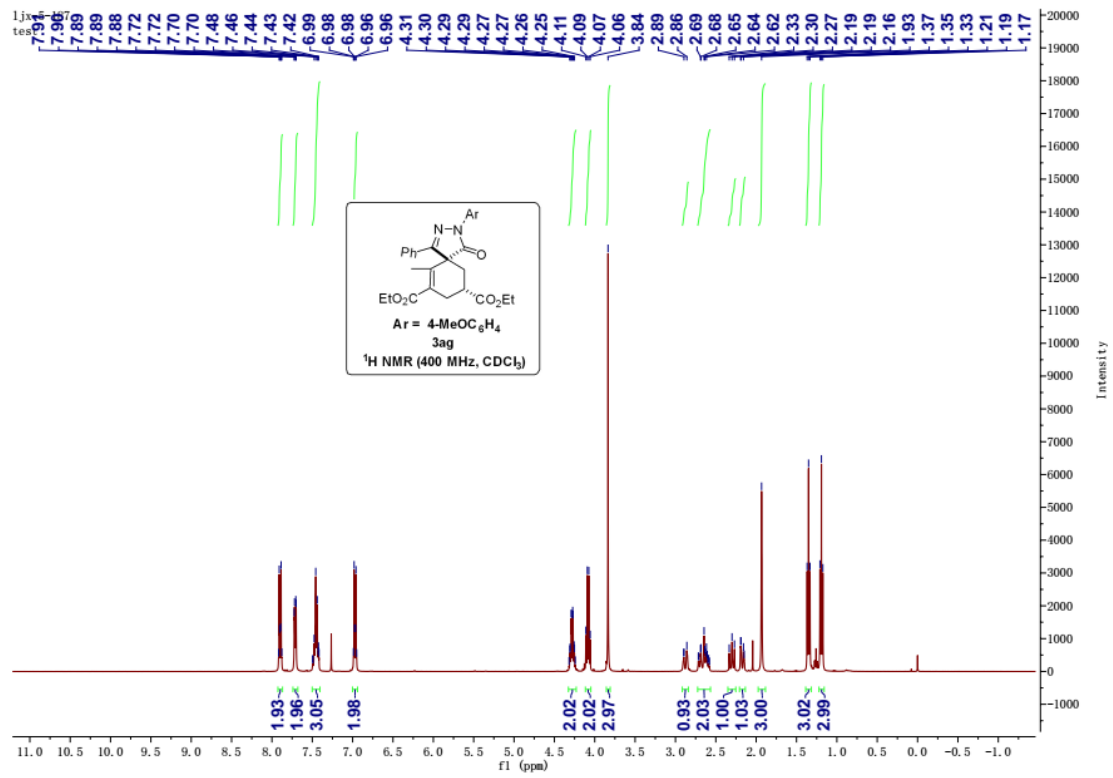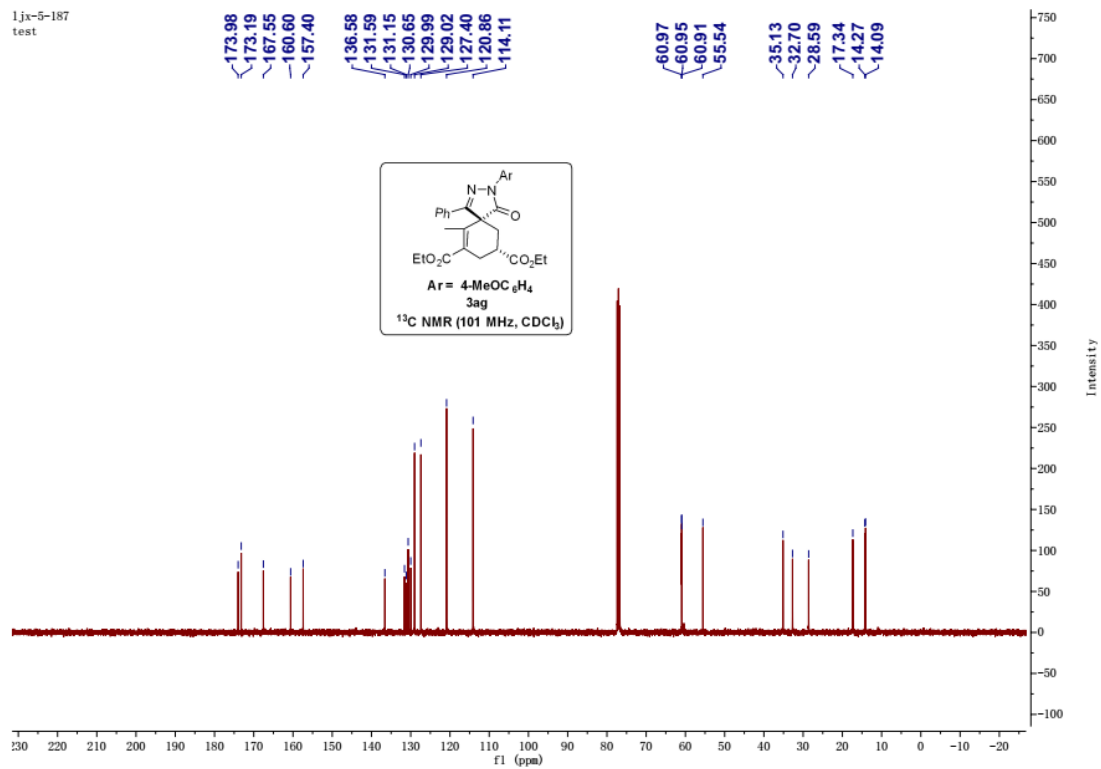

1jx-5-186  
PROTON

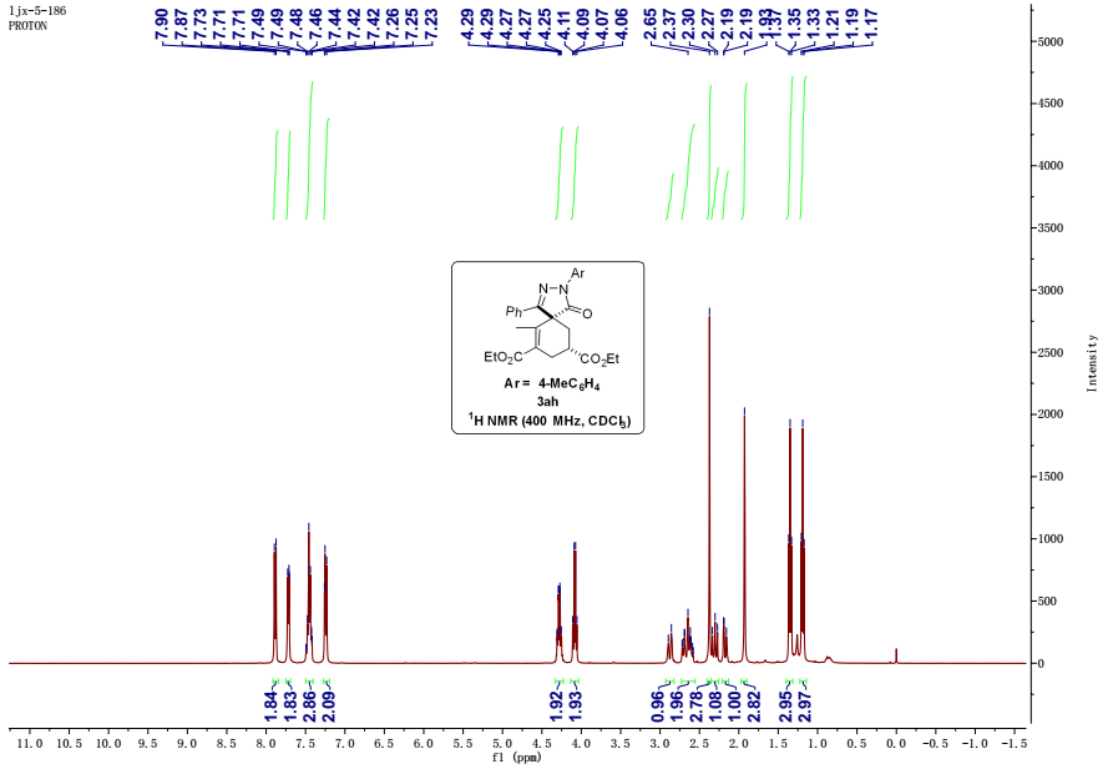

1jx-5-186  
C13CPD

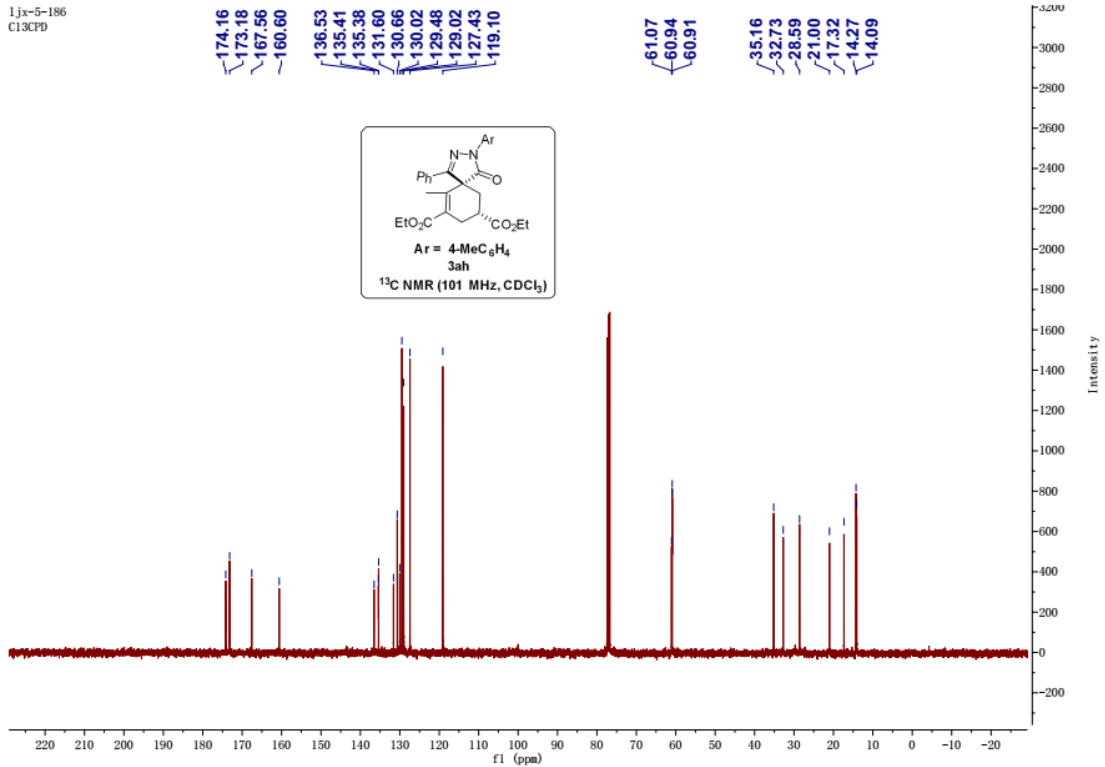



1jx-5-180  
PROTON

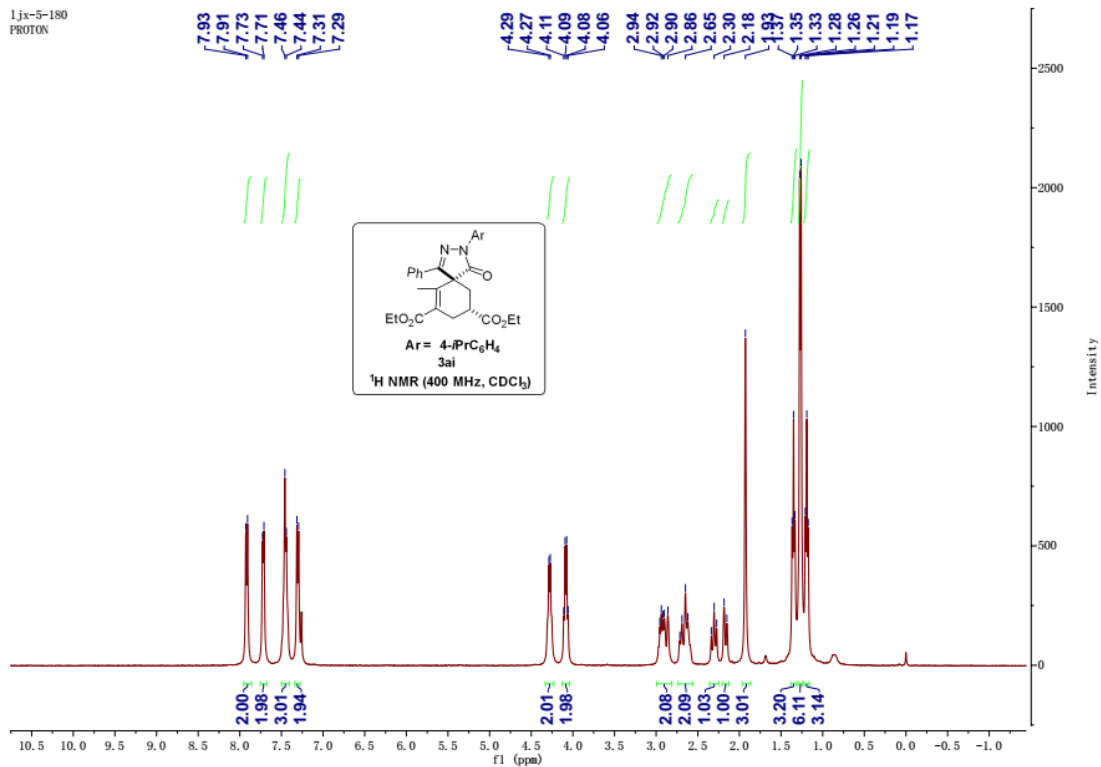

1jx-5-180  
C13CPD

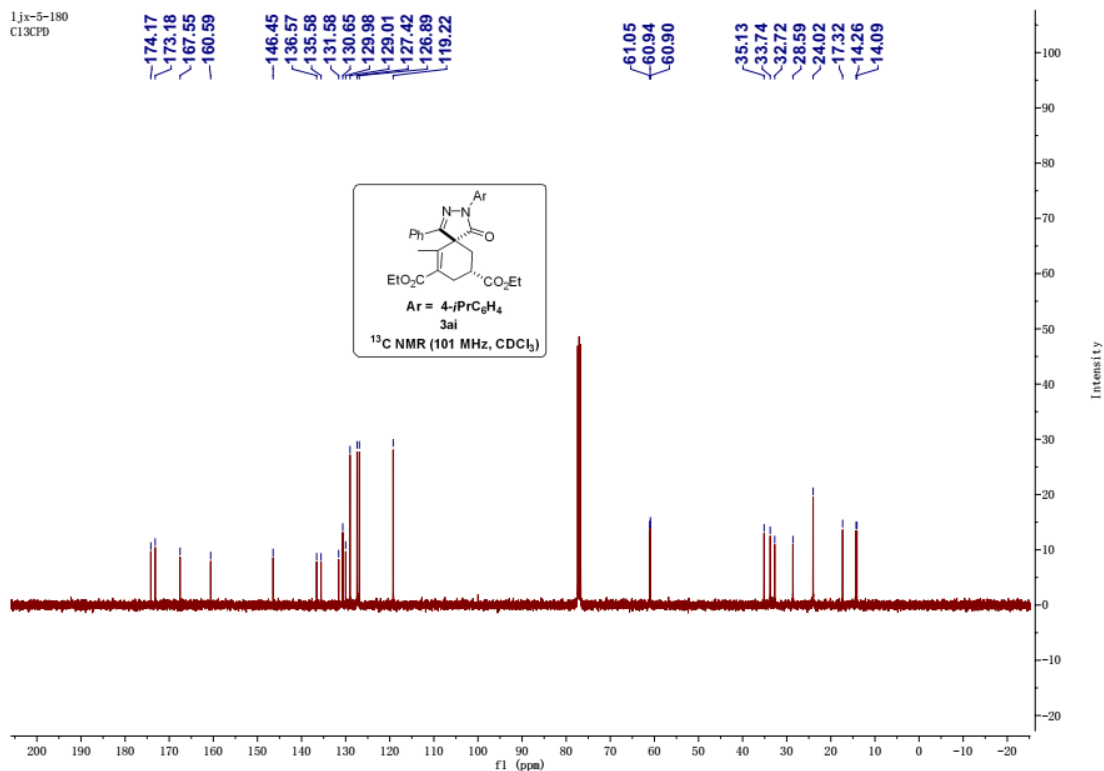

1jx-5-181  
PROTON

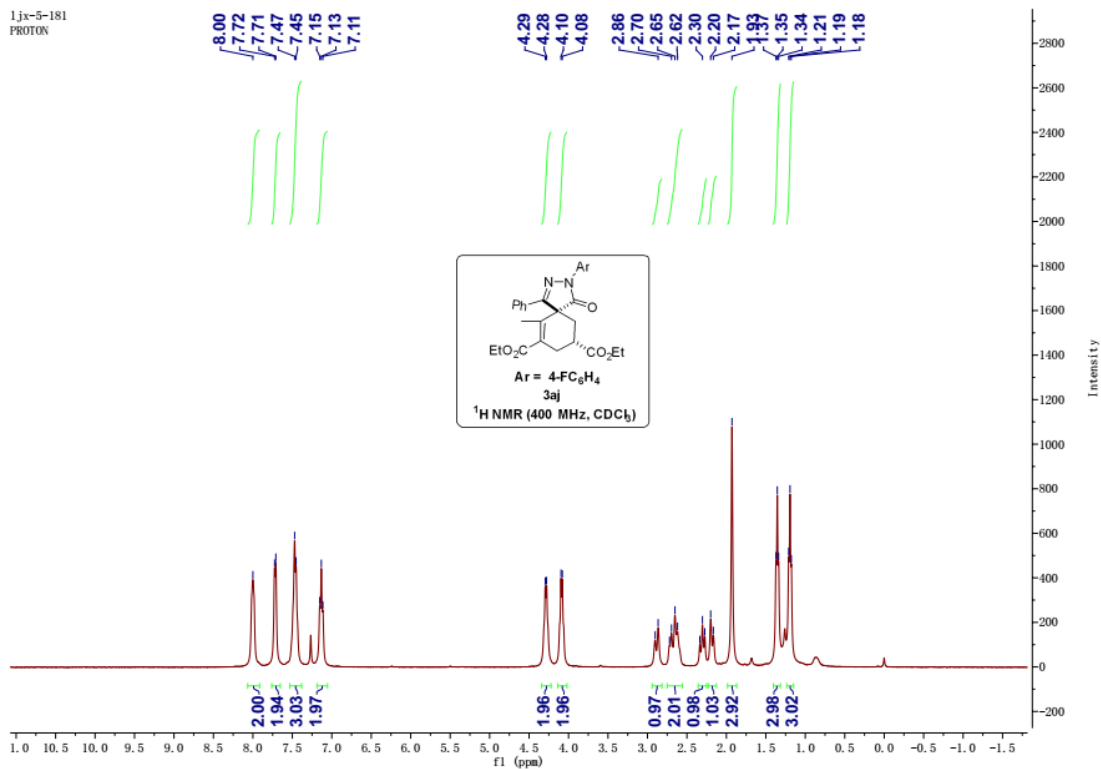

1jx-5-181  
C13CPD

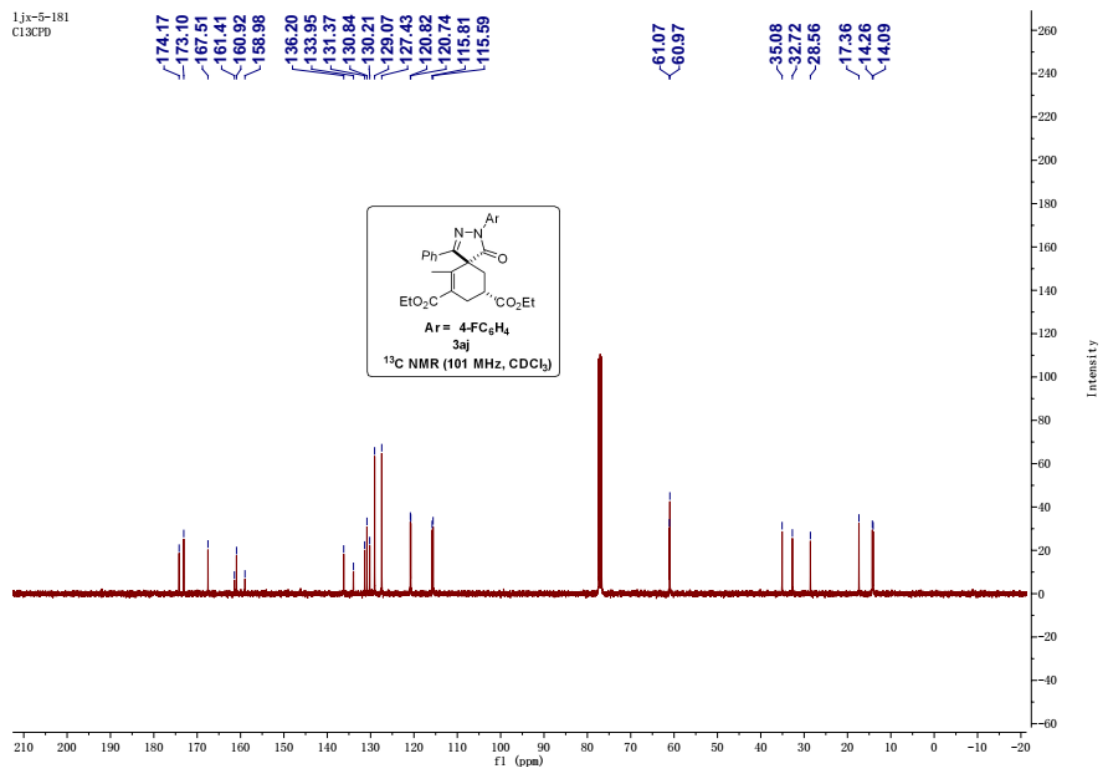

ljx-5-181  
F19

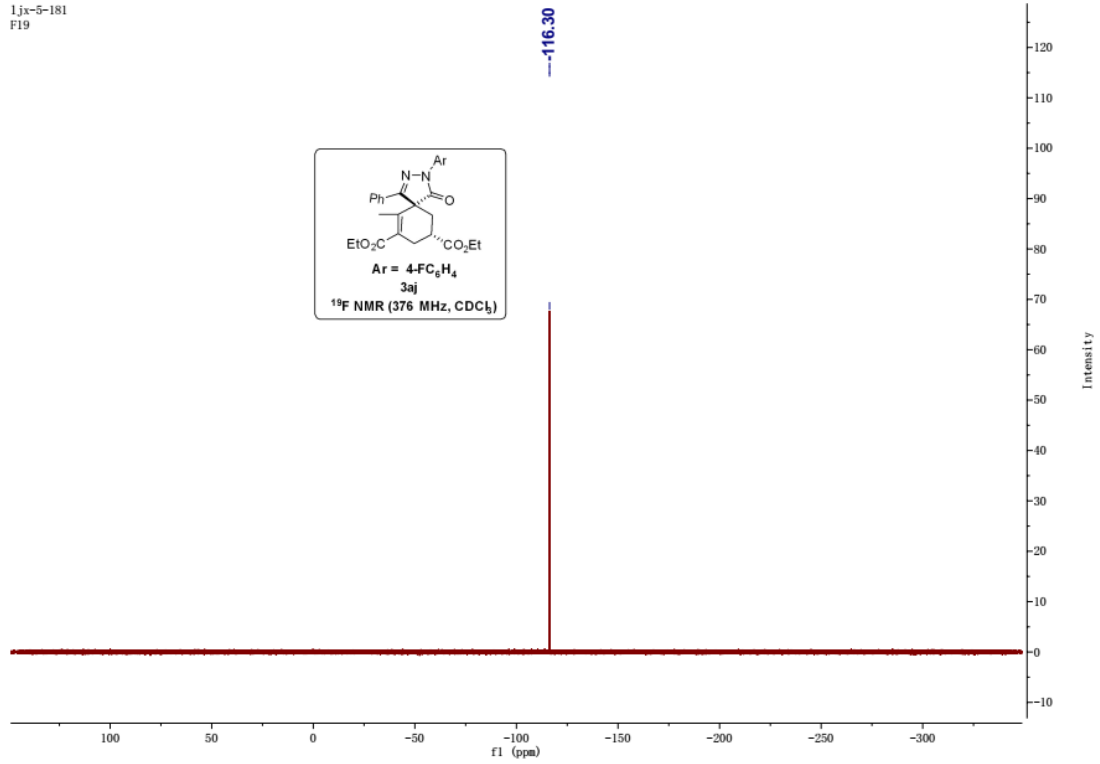

ljx-5-183  
test

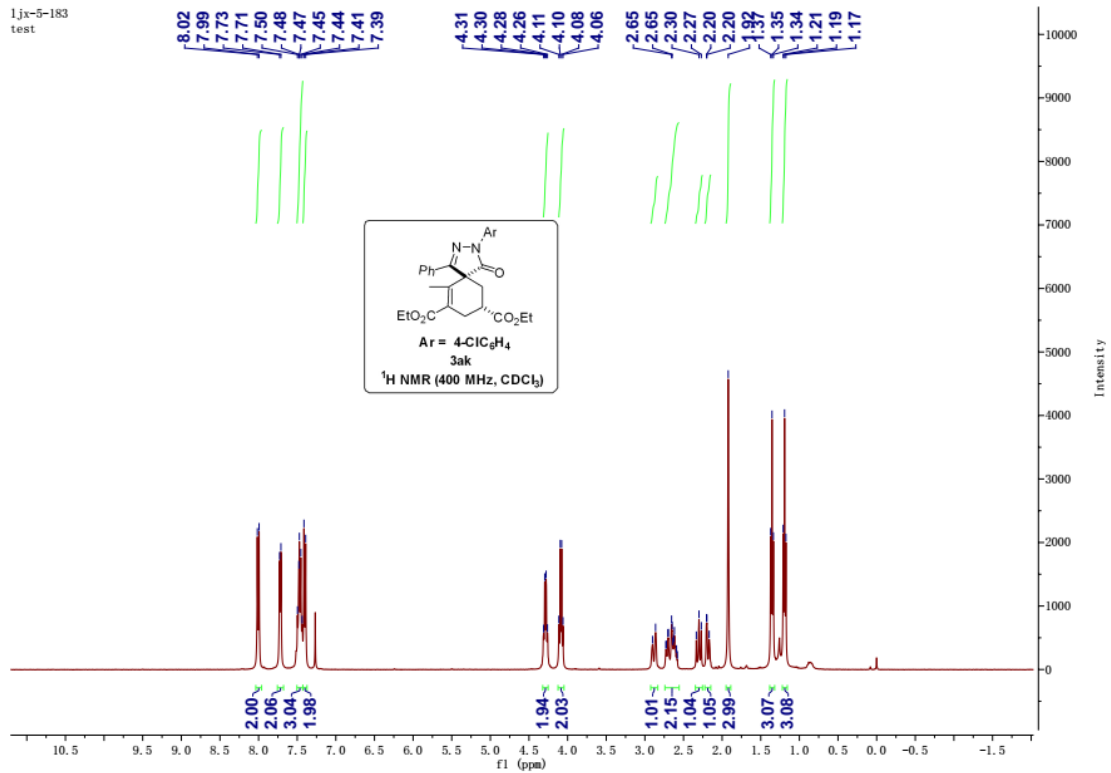

ljx-5-183  
test

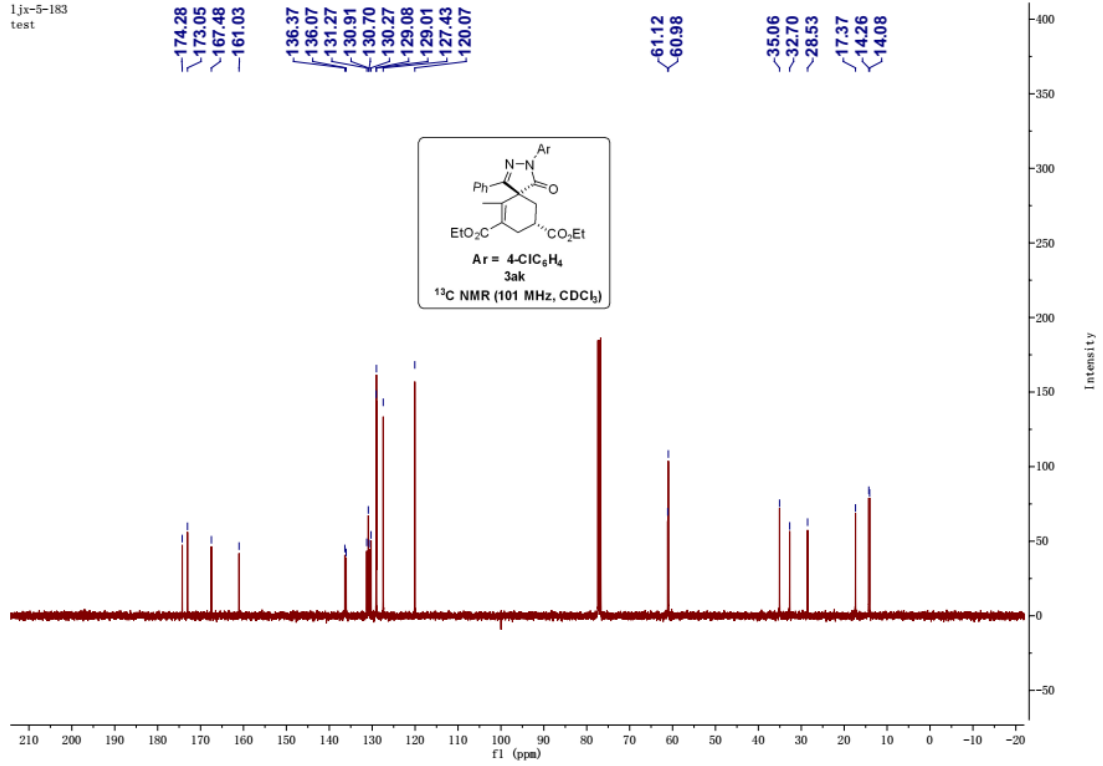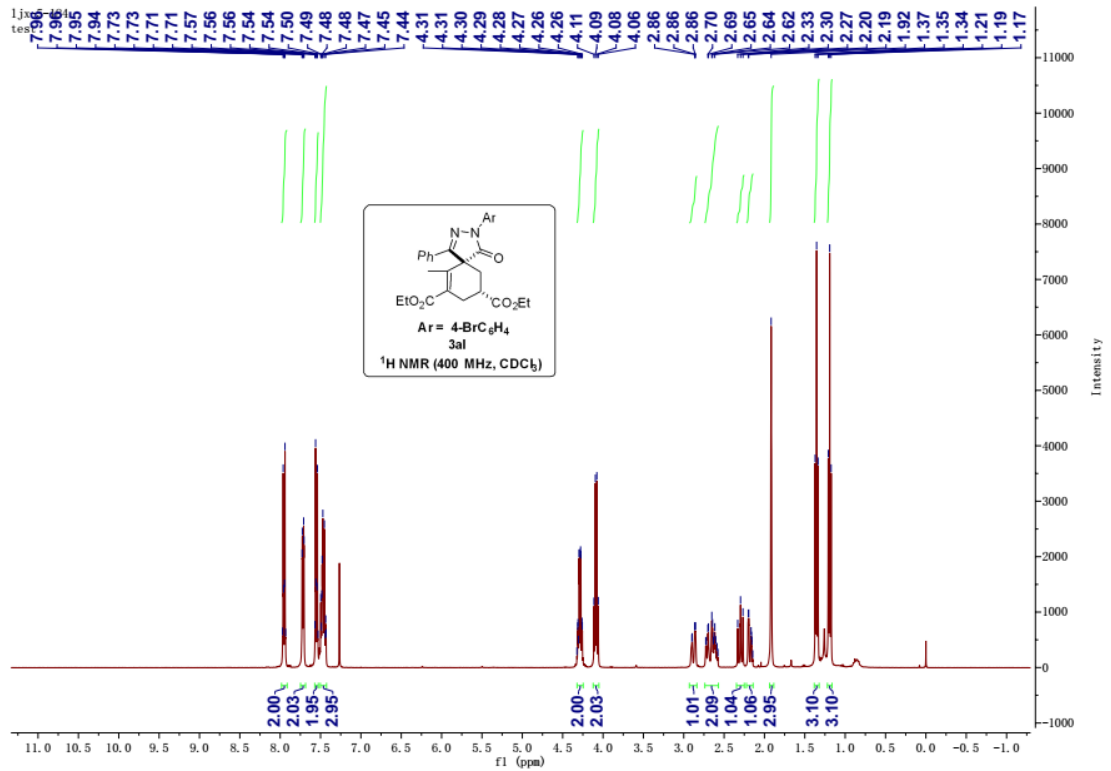

1jx-5-184  
test

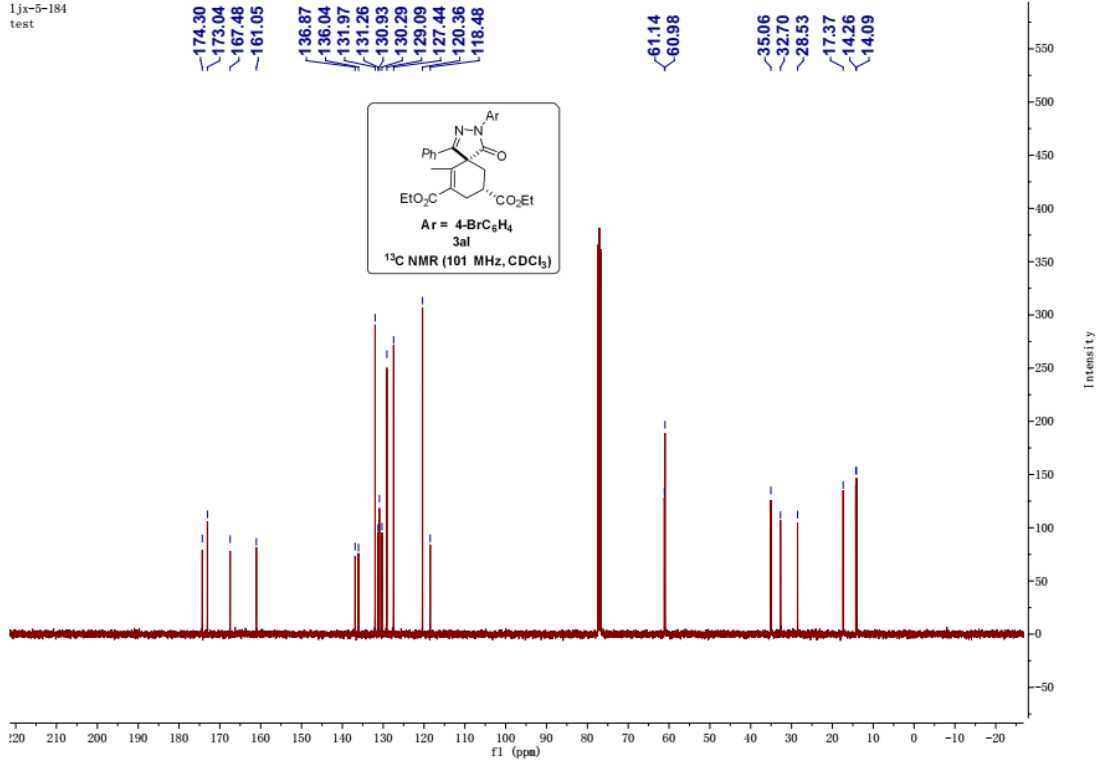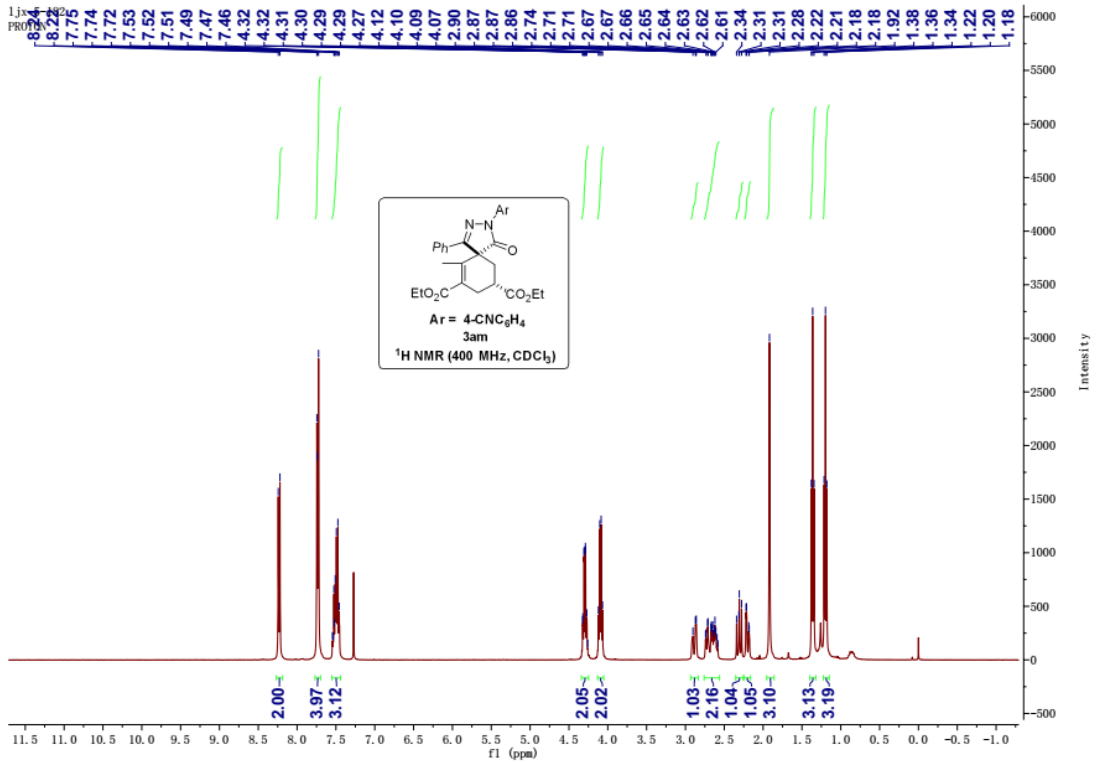

1jx-5-182  
Cl3CPD

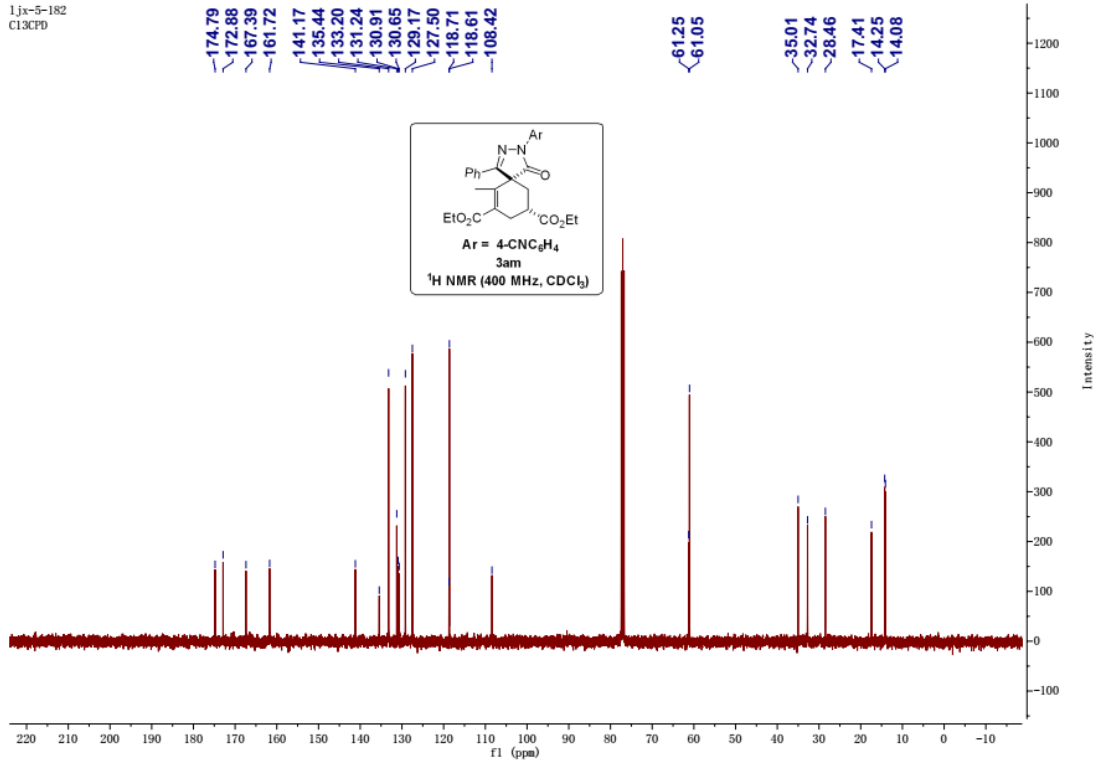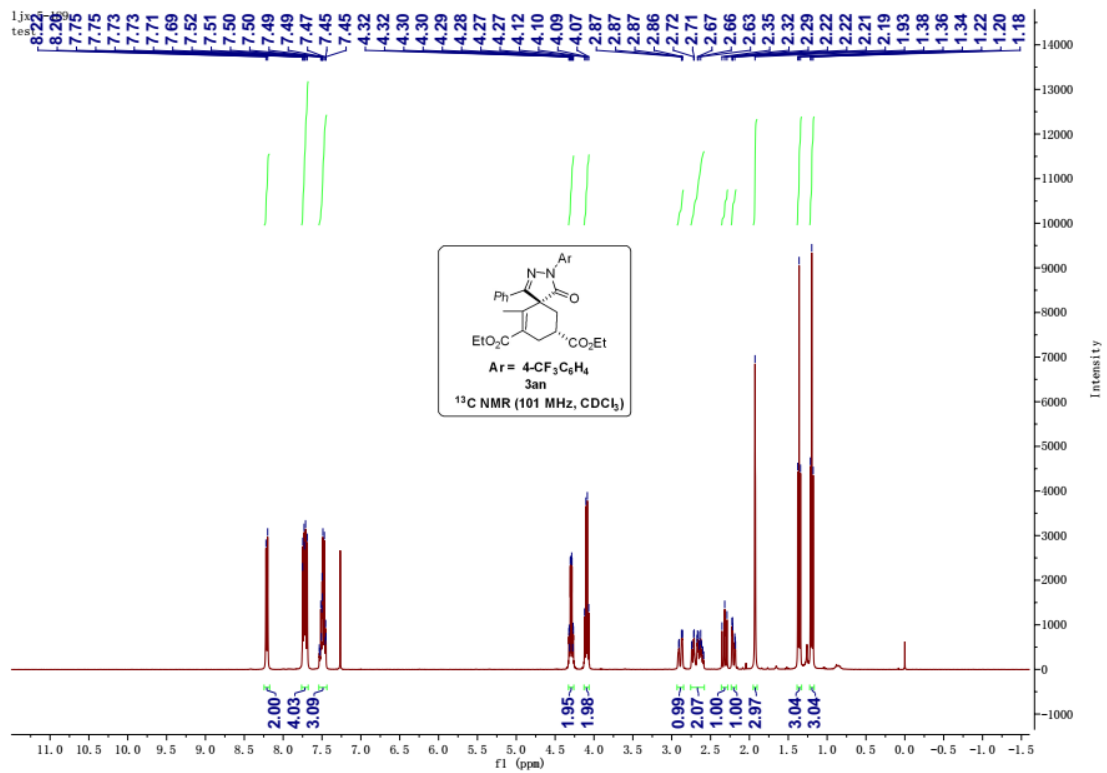

1jx-5-189  
test

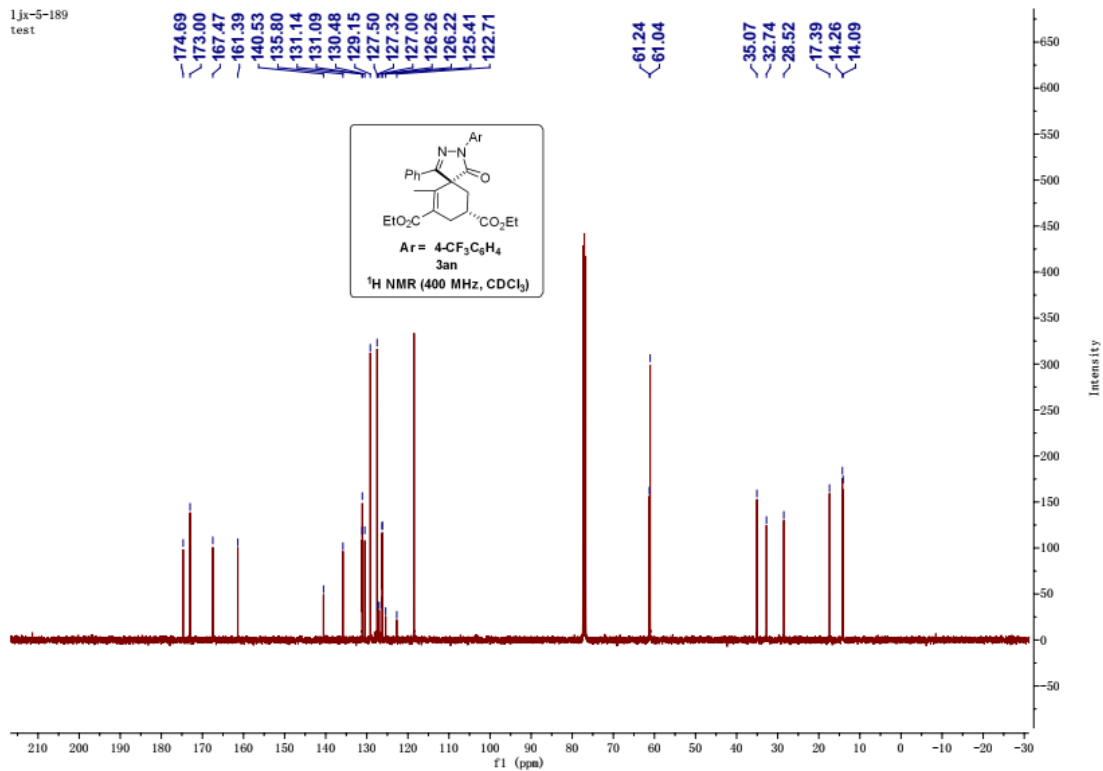

1jx-5-189  
F19

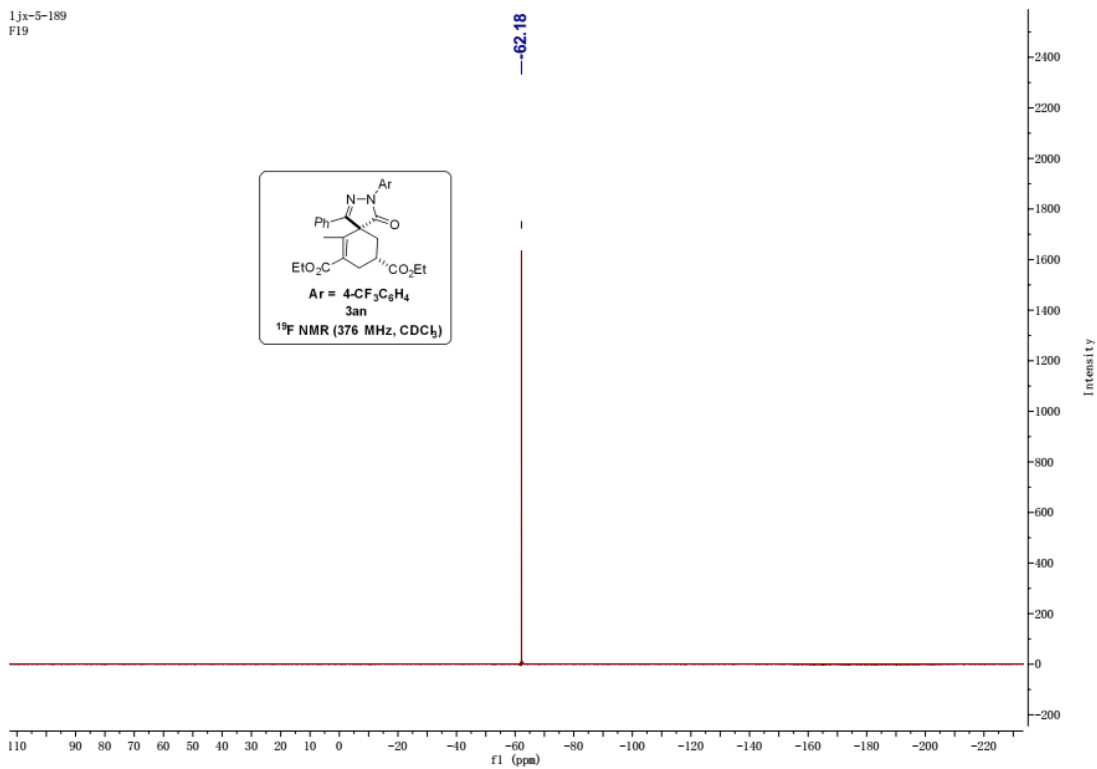

l1x-5-185  
test

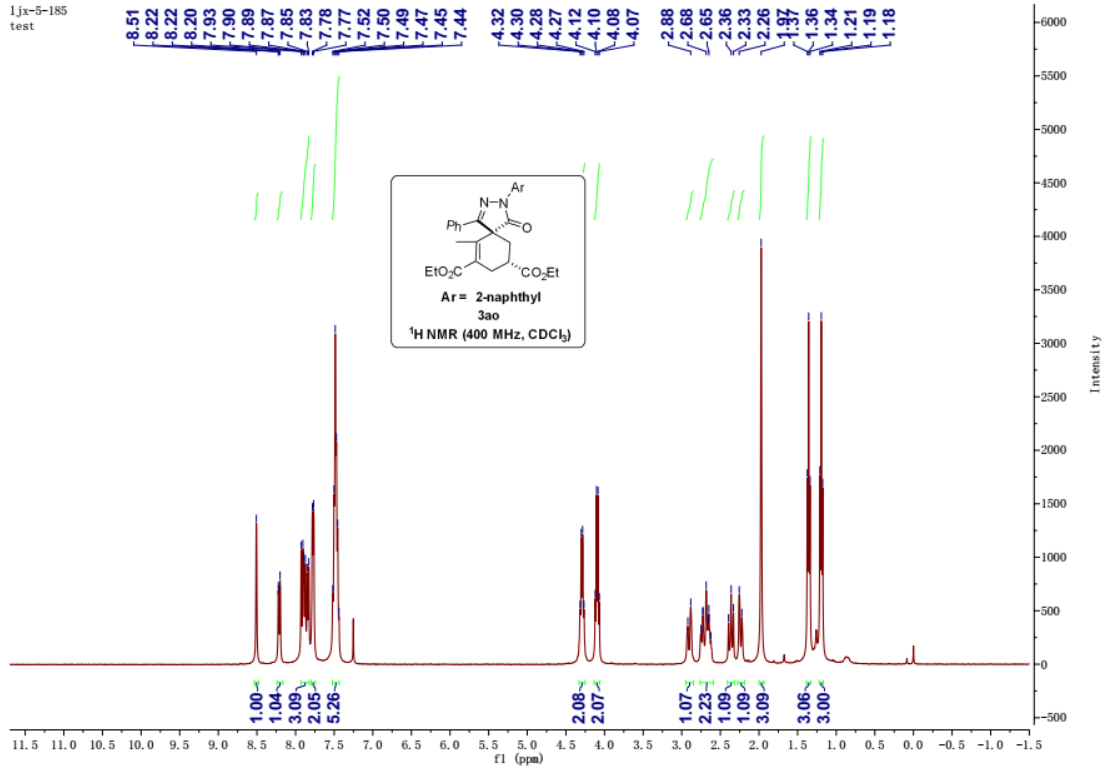

l1x-5-185  
test

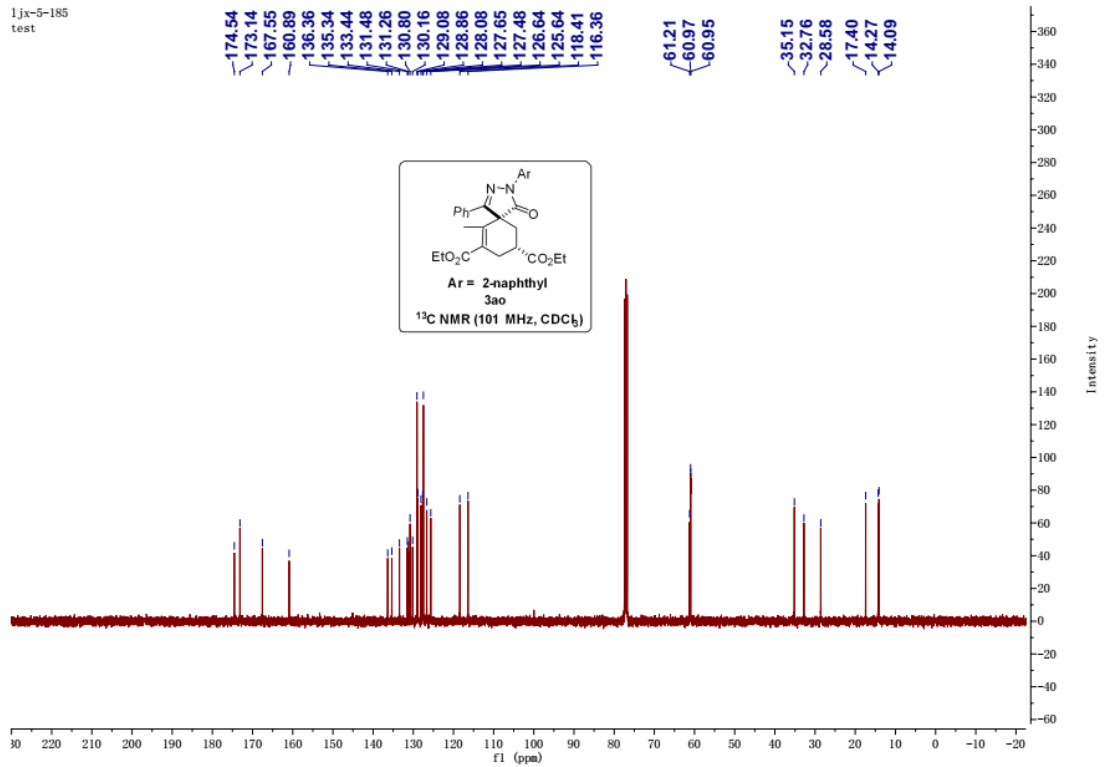



ljx-5-185  
test

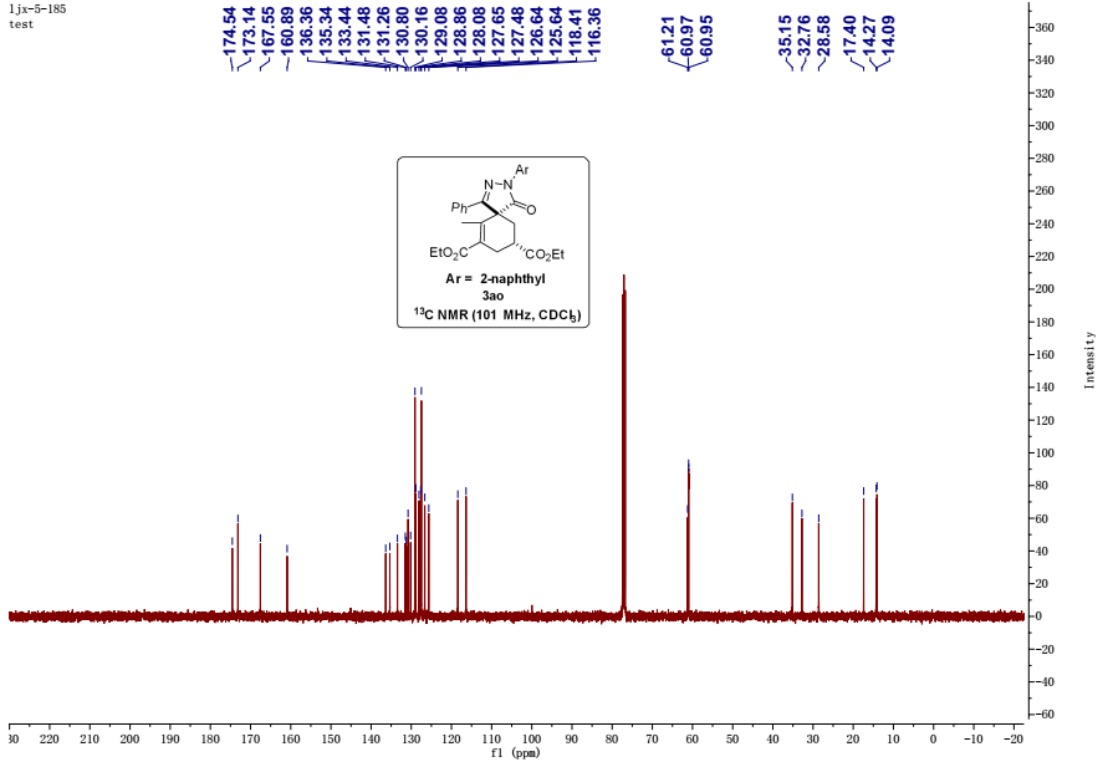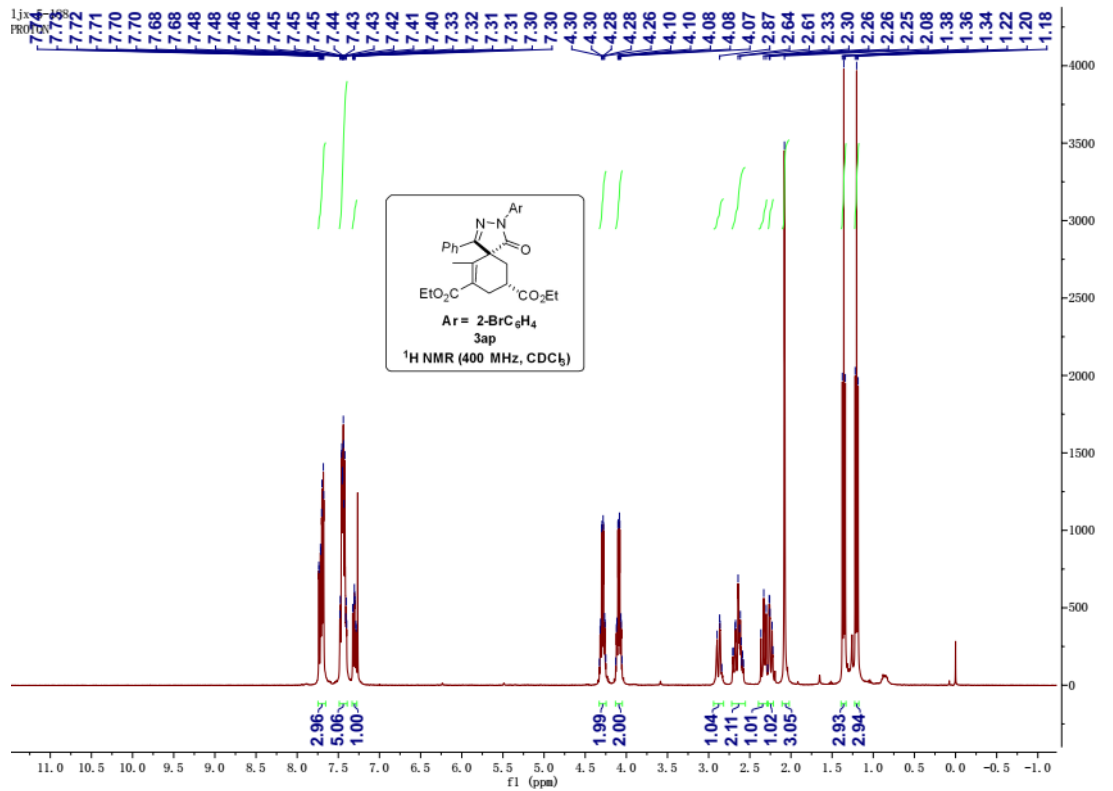

1jx-5-188  
C13CPD

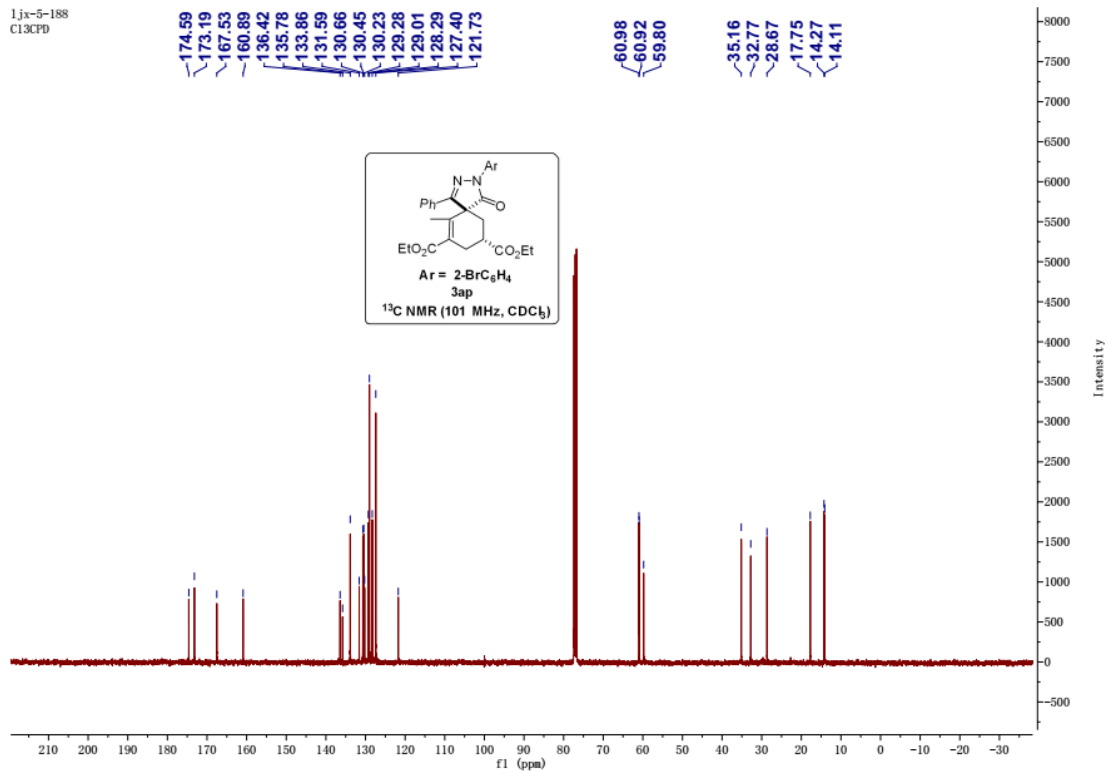

1jx-5-190  
test

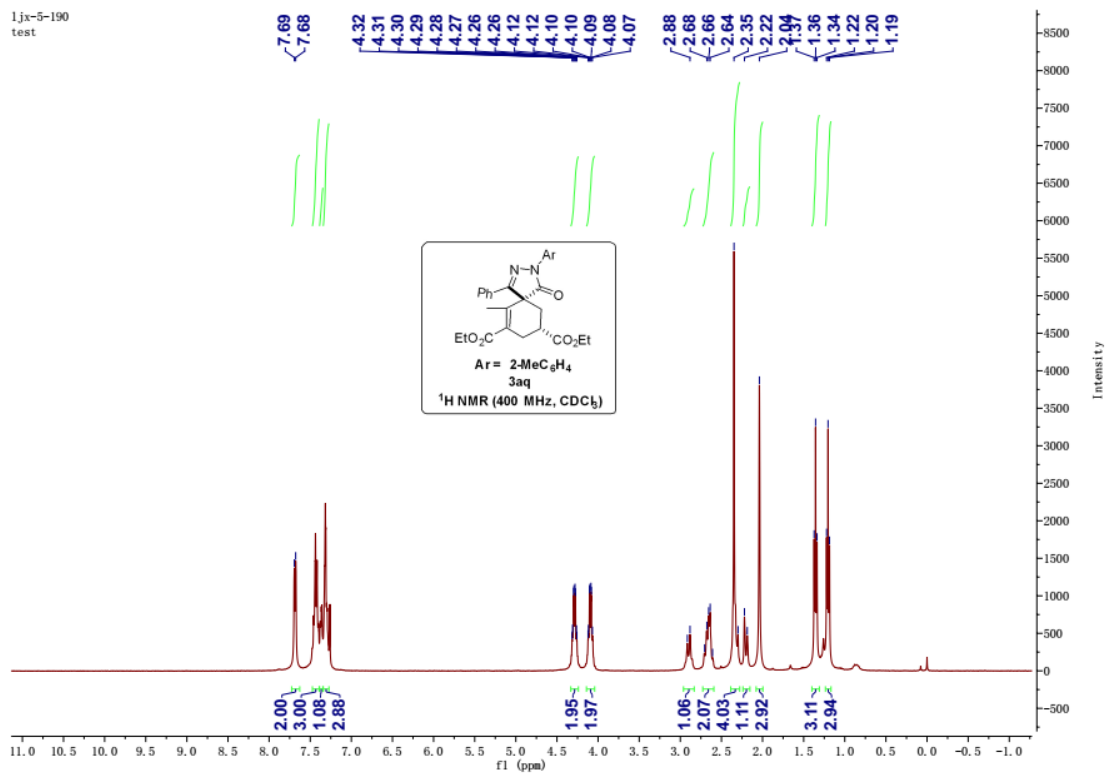

1jx-5-190  
test

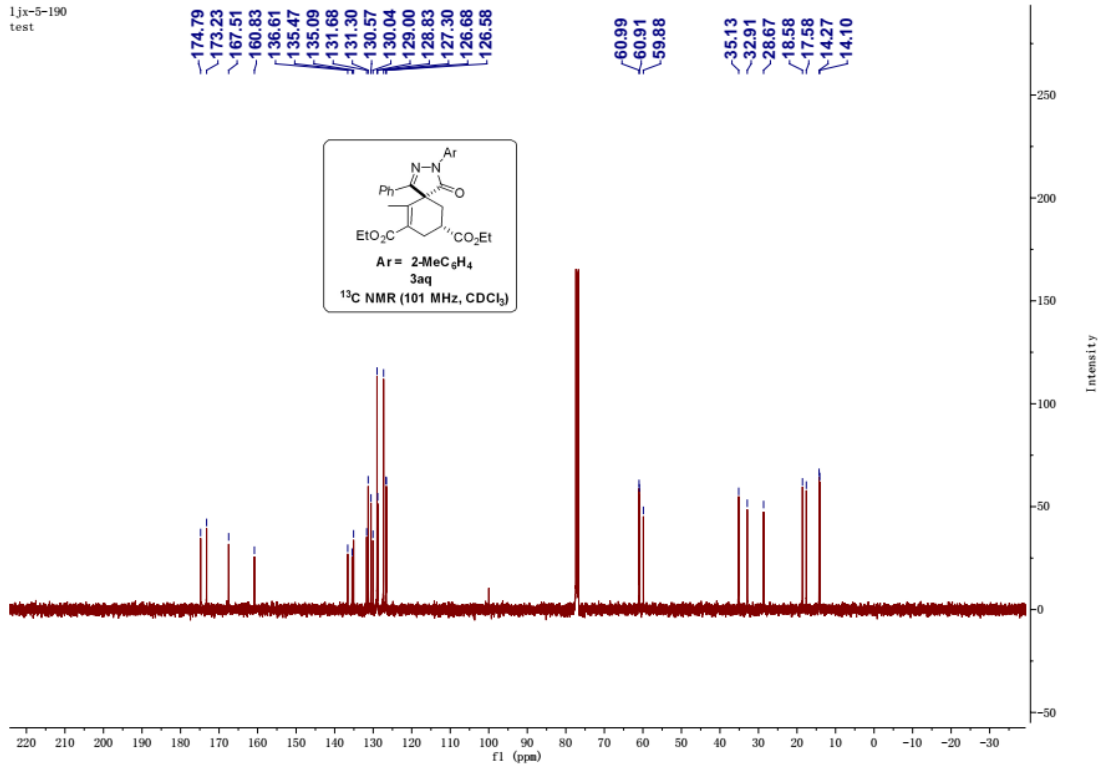

1jx-5-191  
test

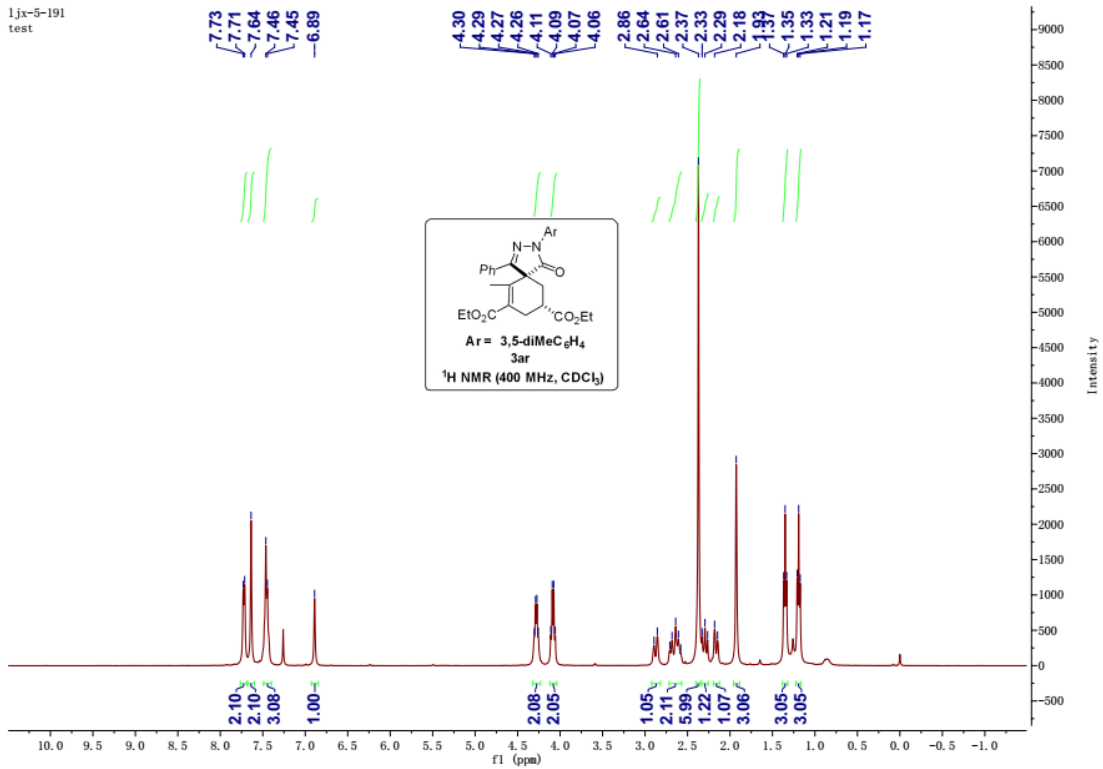

ljx-5-191  
test

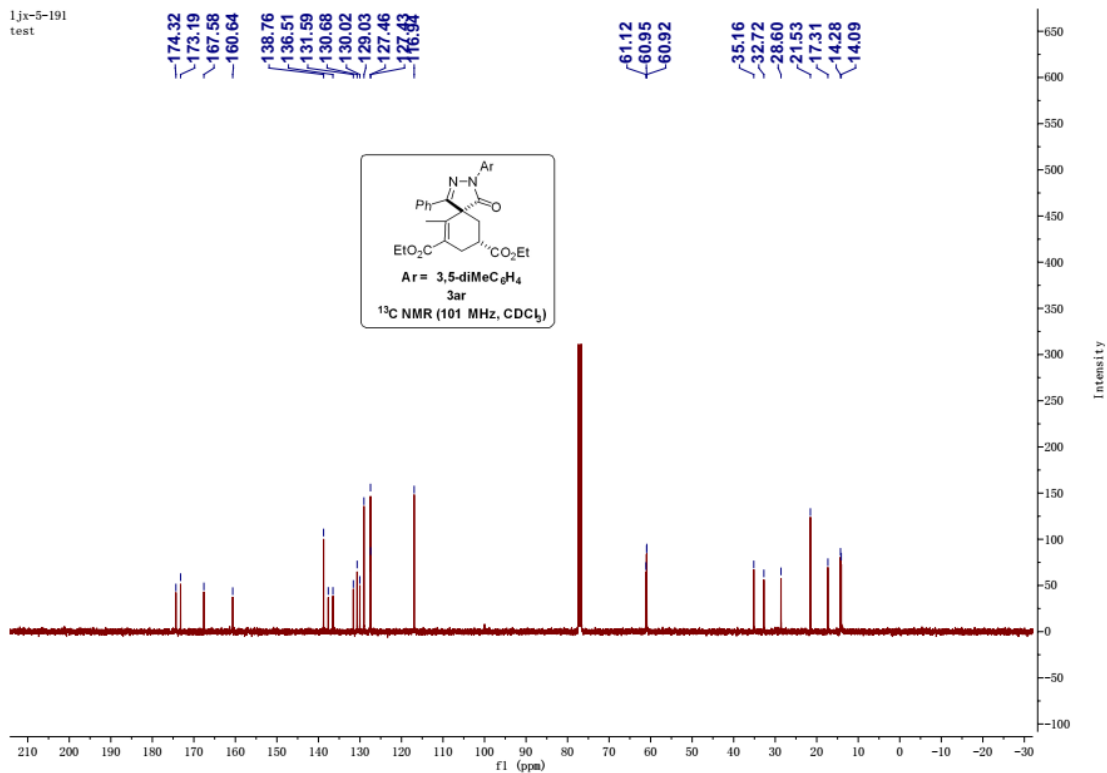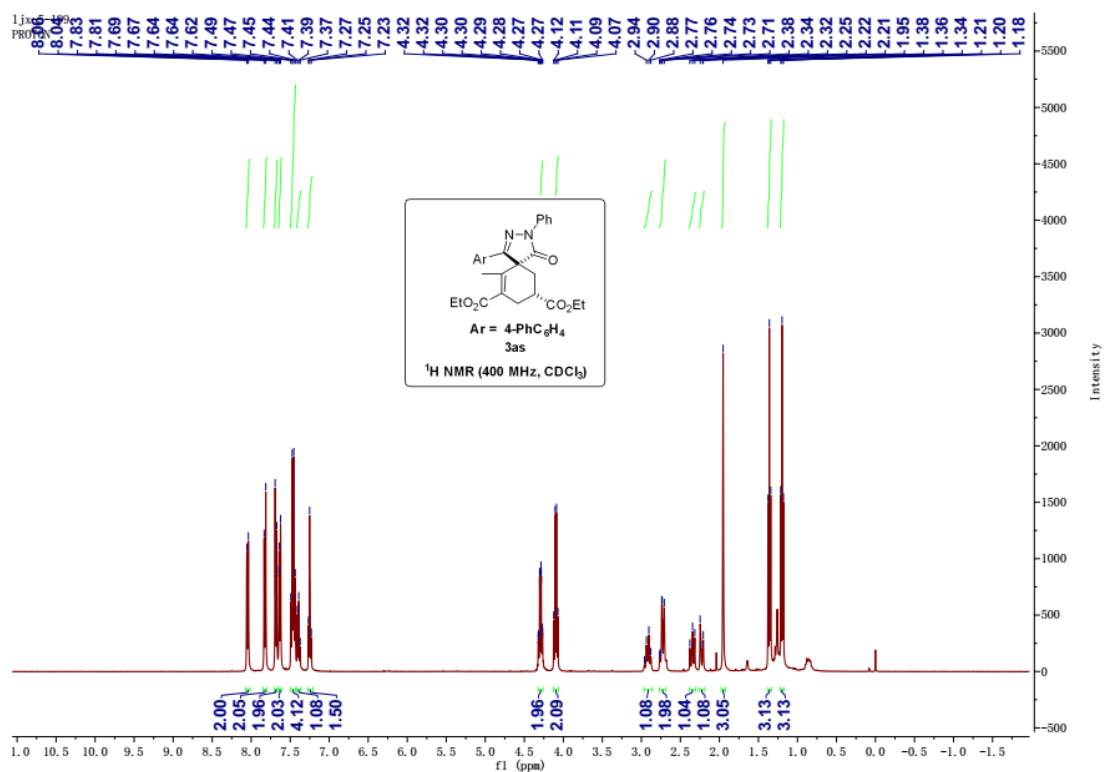

Ljx-5-199  
C13CPD

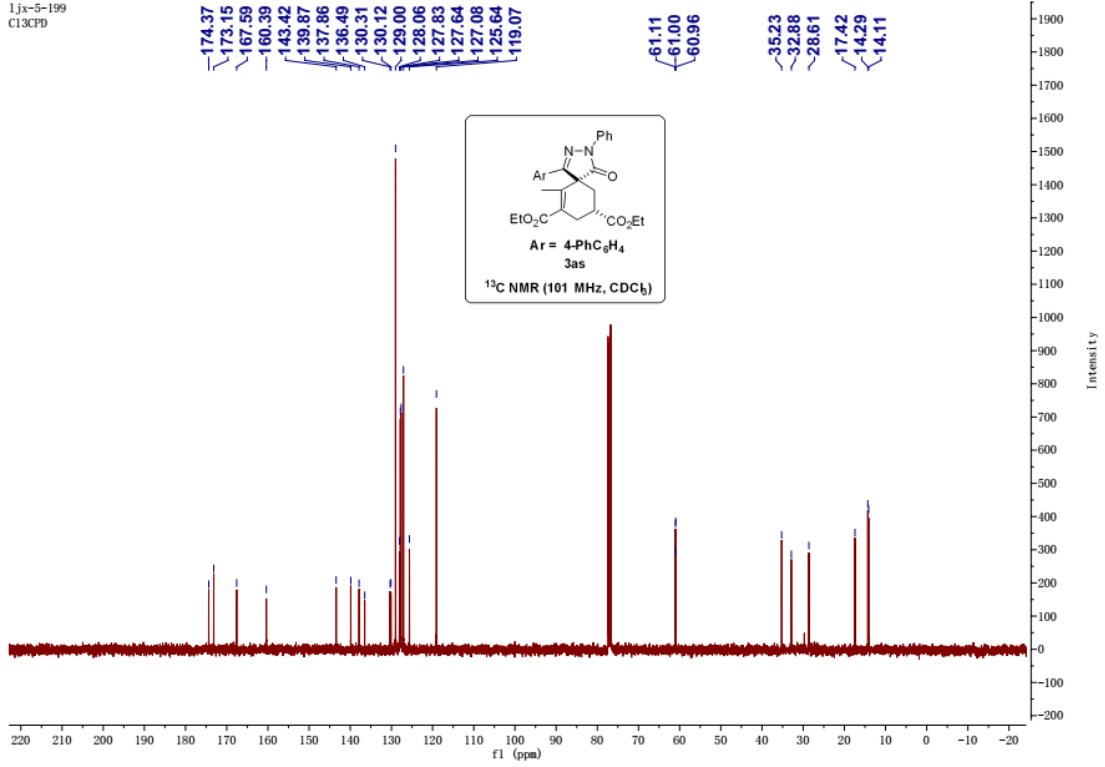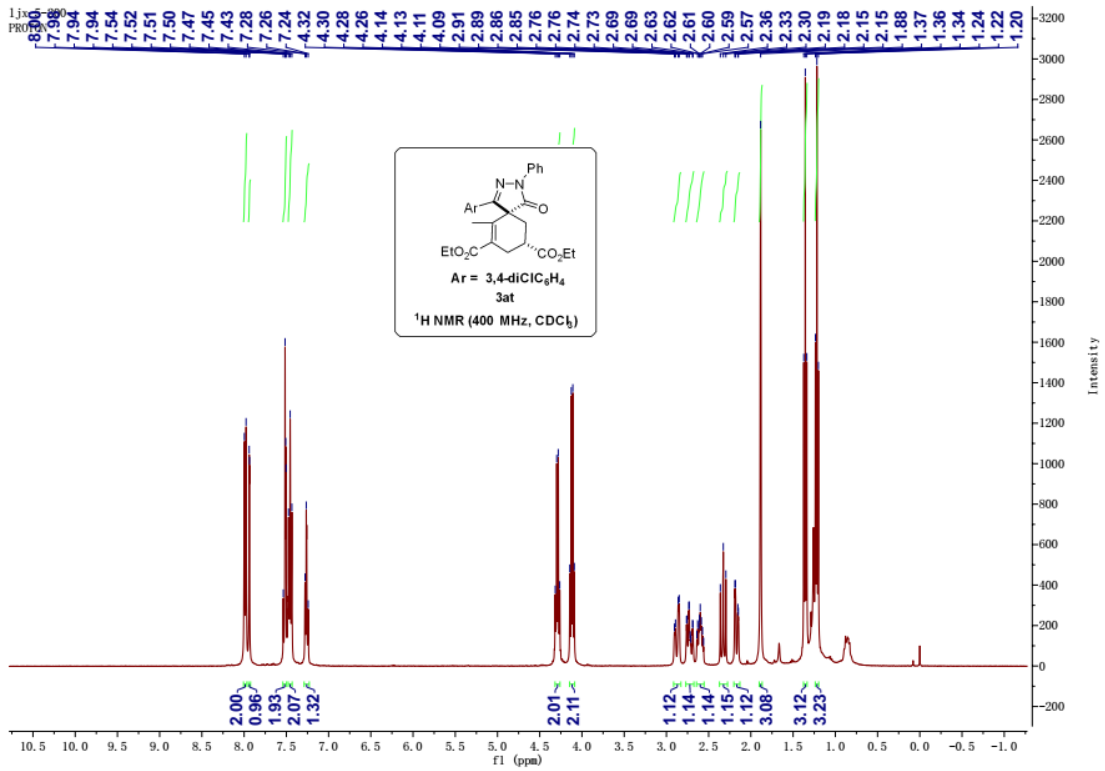

1jx-5-200  
C13CPD

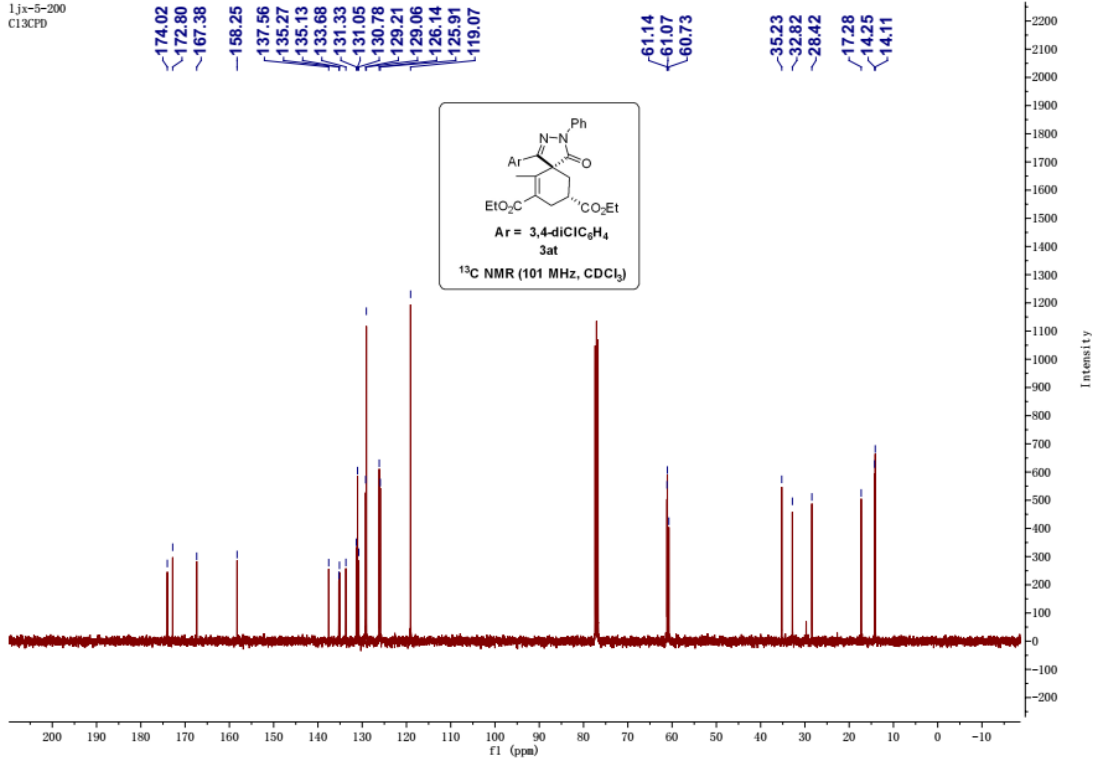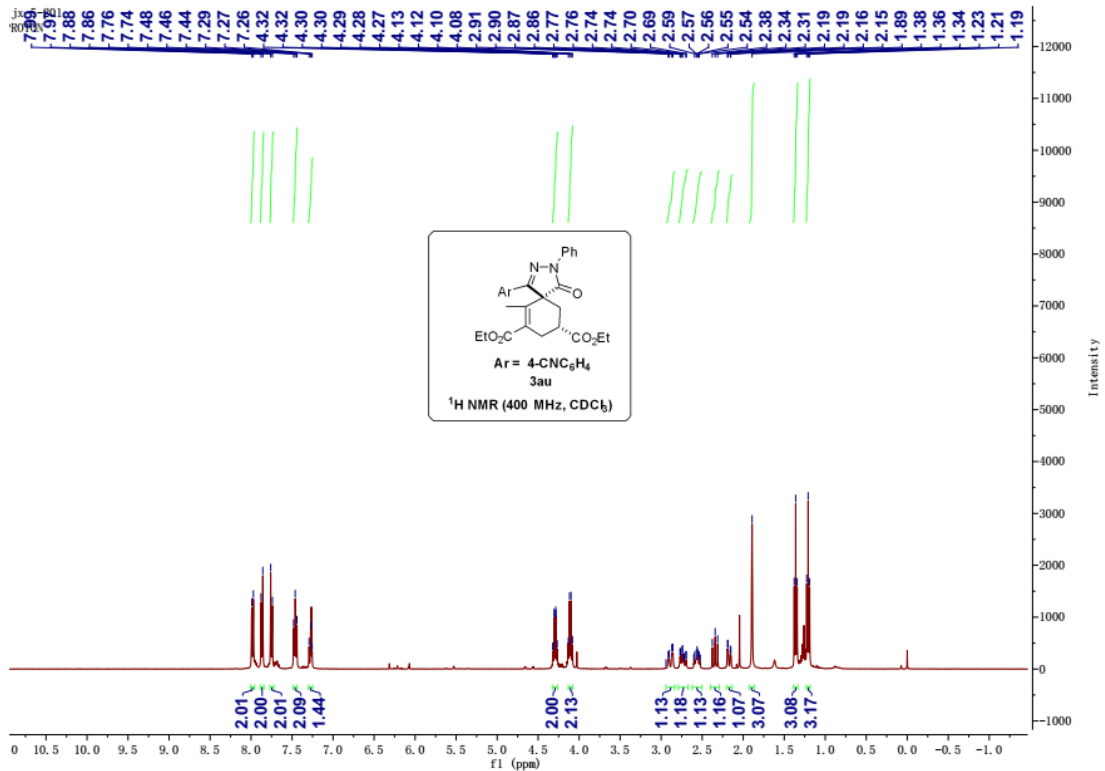

1jx-5-201  
Cl3CPD

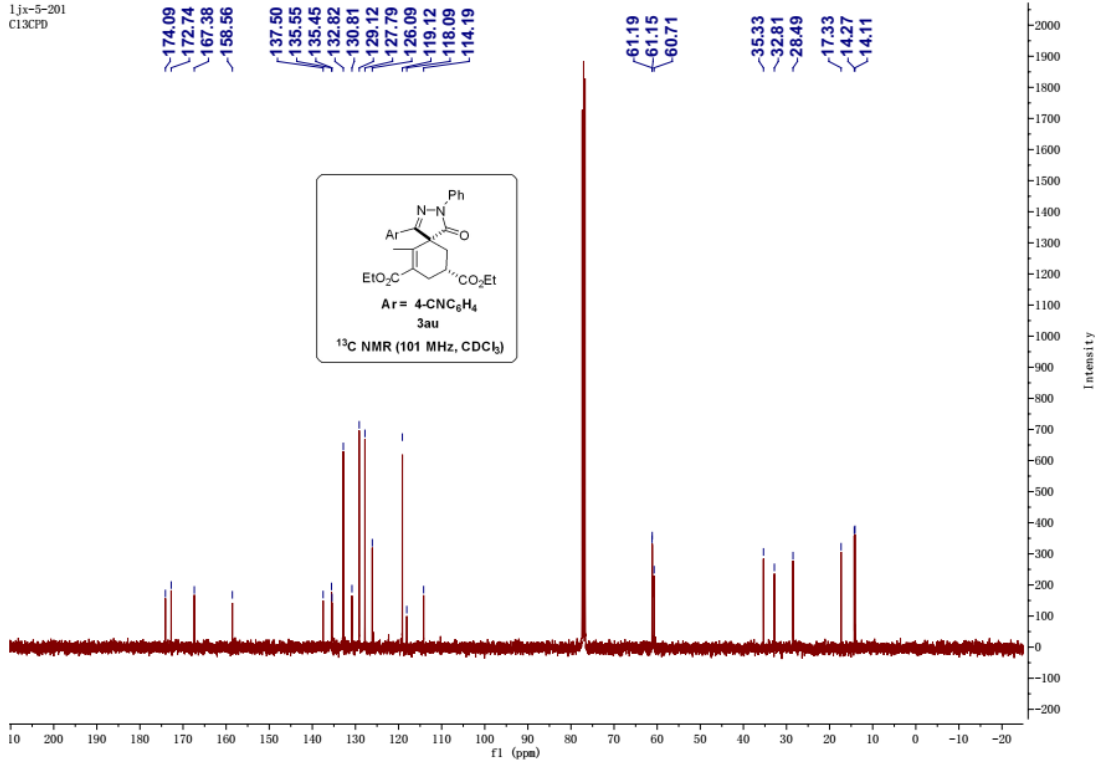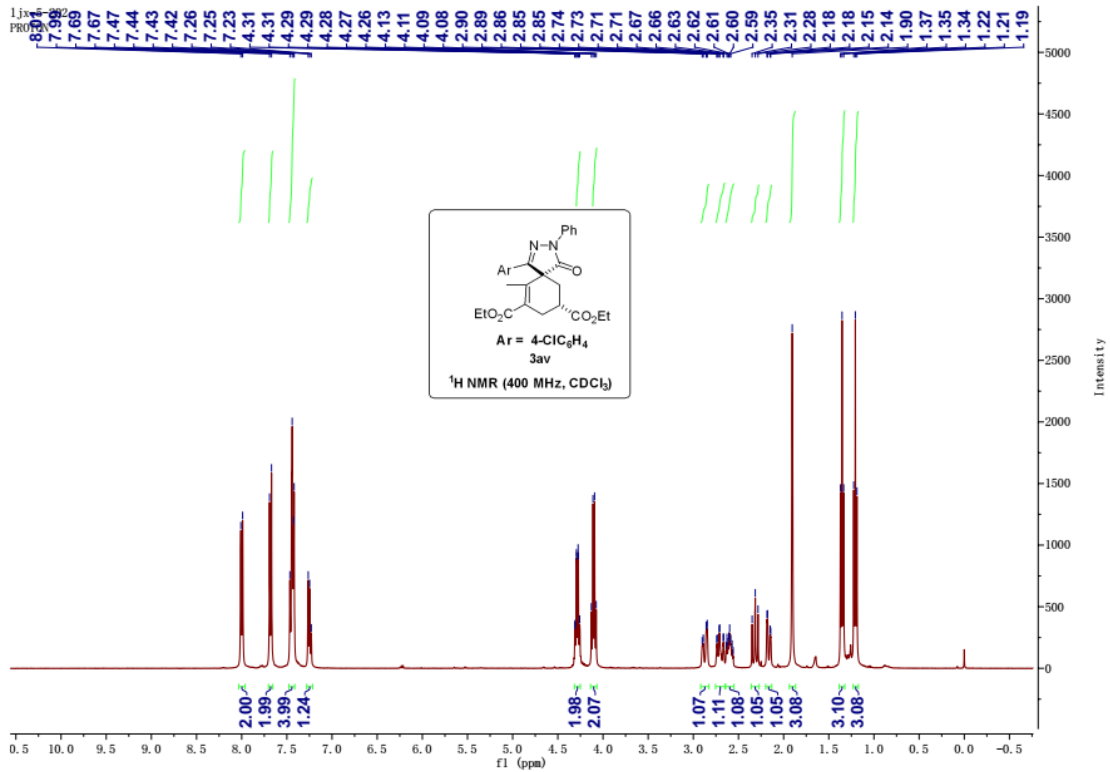

1jx-5-202  
C13CFD

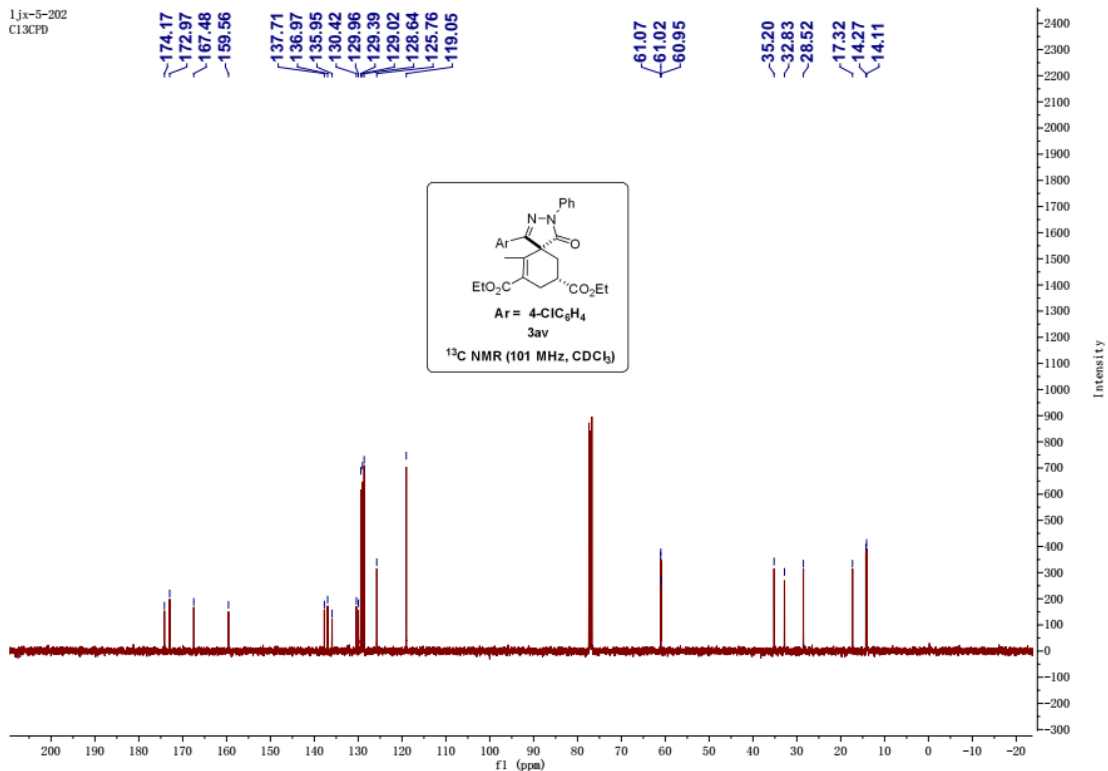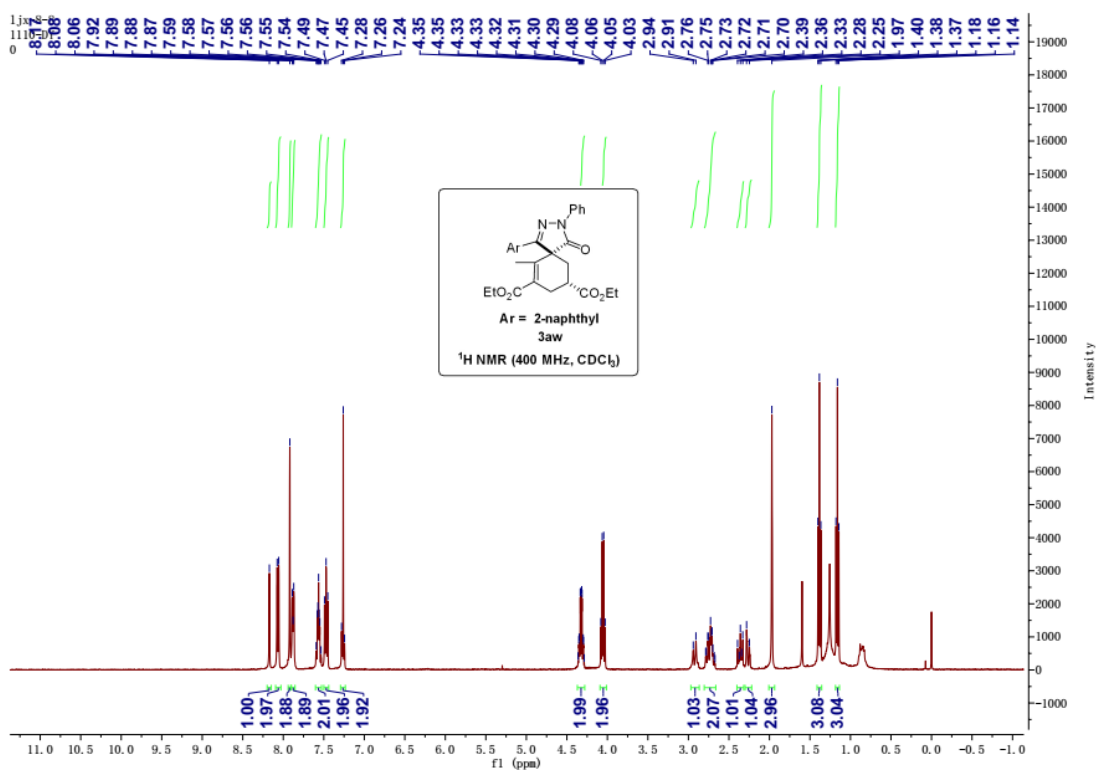



1jx-8-8  
Cl3CPD

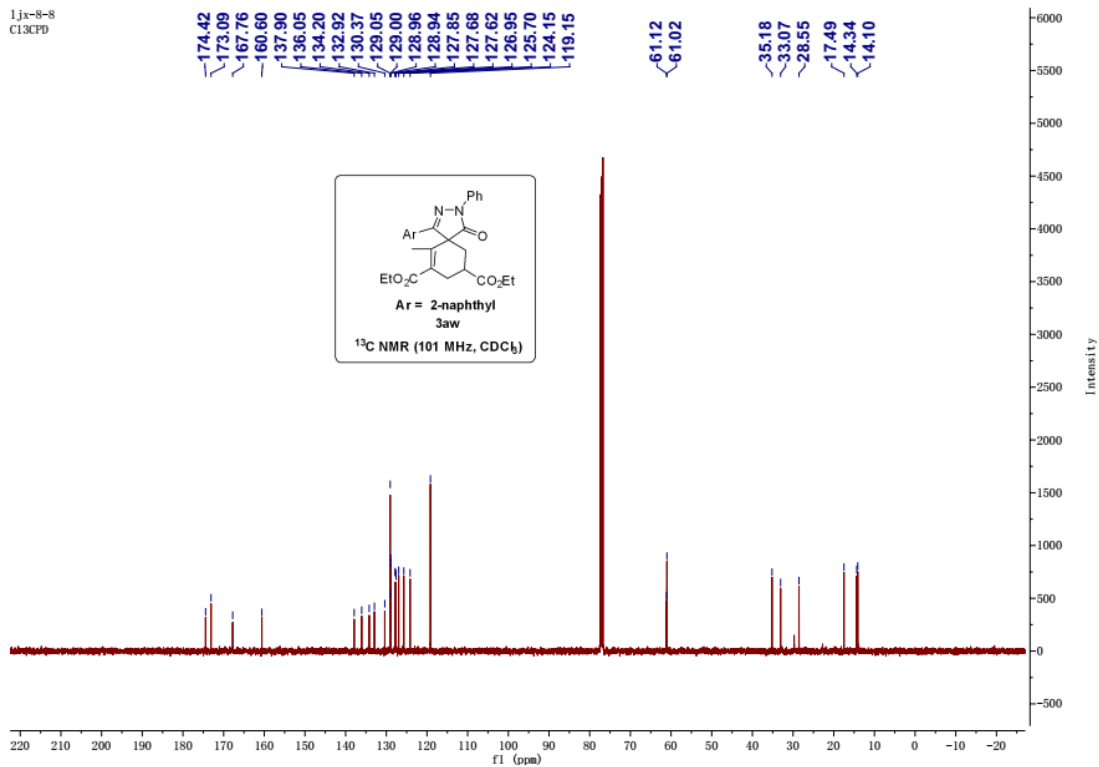

1jx-10-161(3ax)  
PROTON

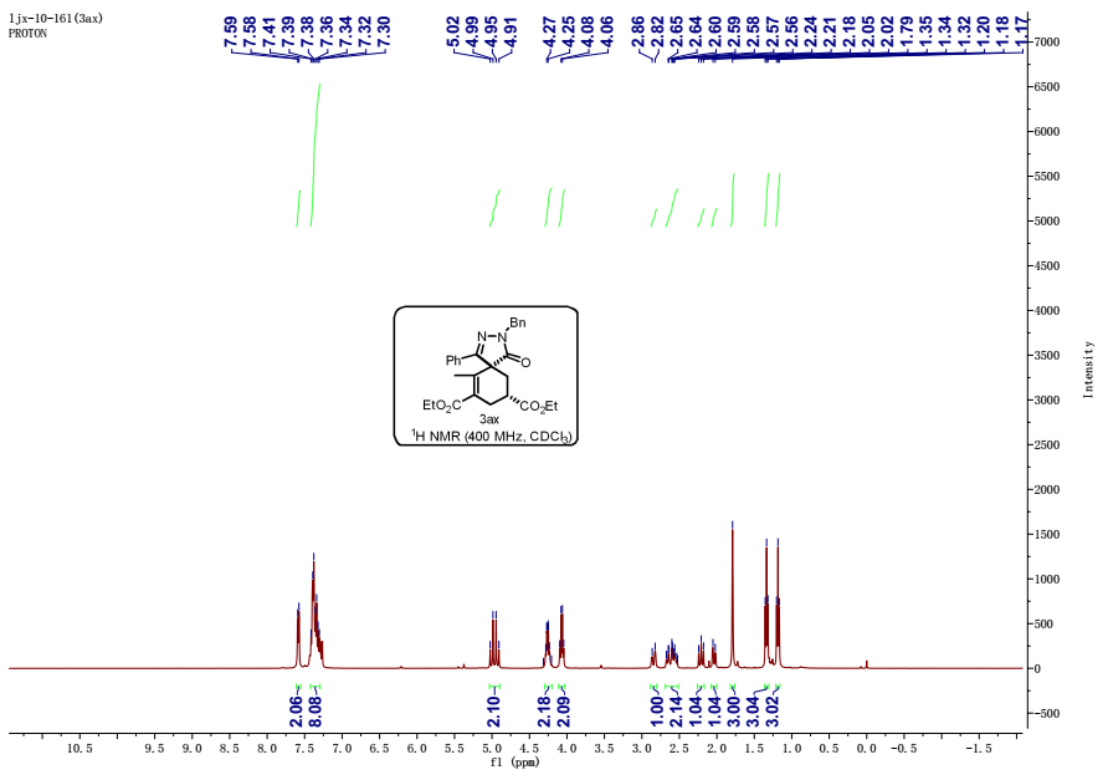

1jx-10-161(3ax)  
C13CPD

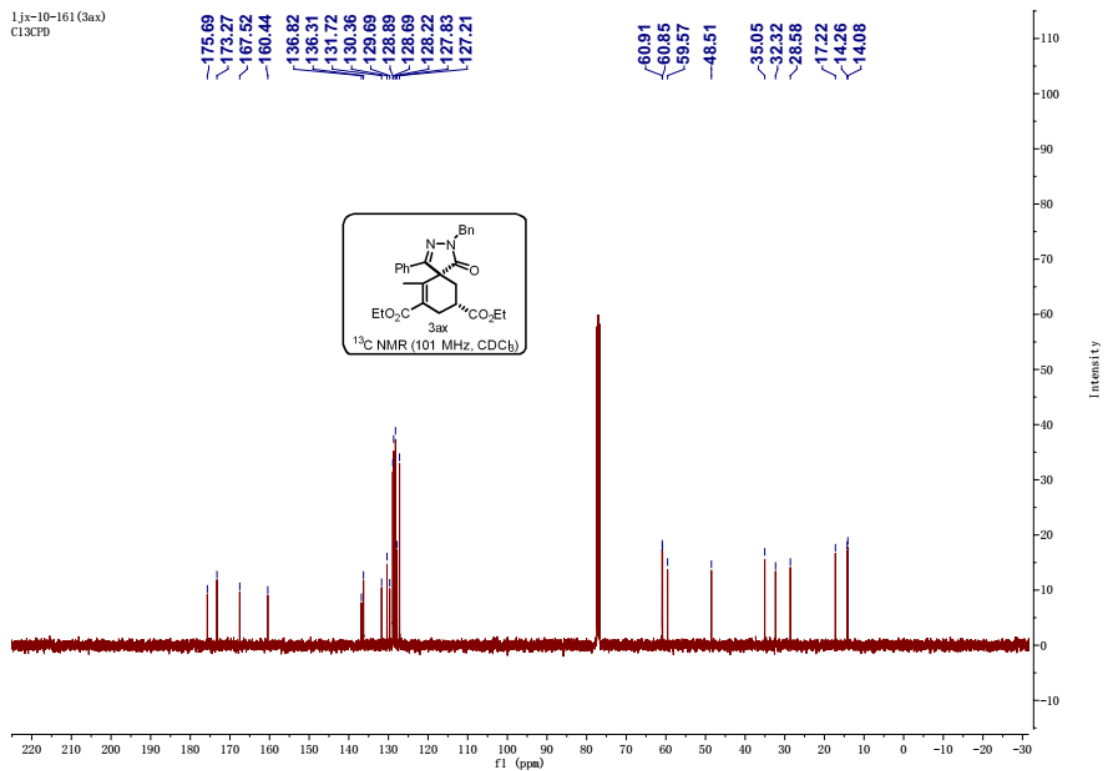

1jx-10-162(3ay)  
PROTON

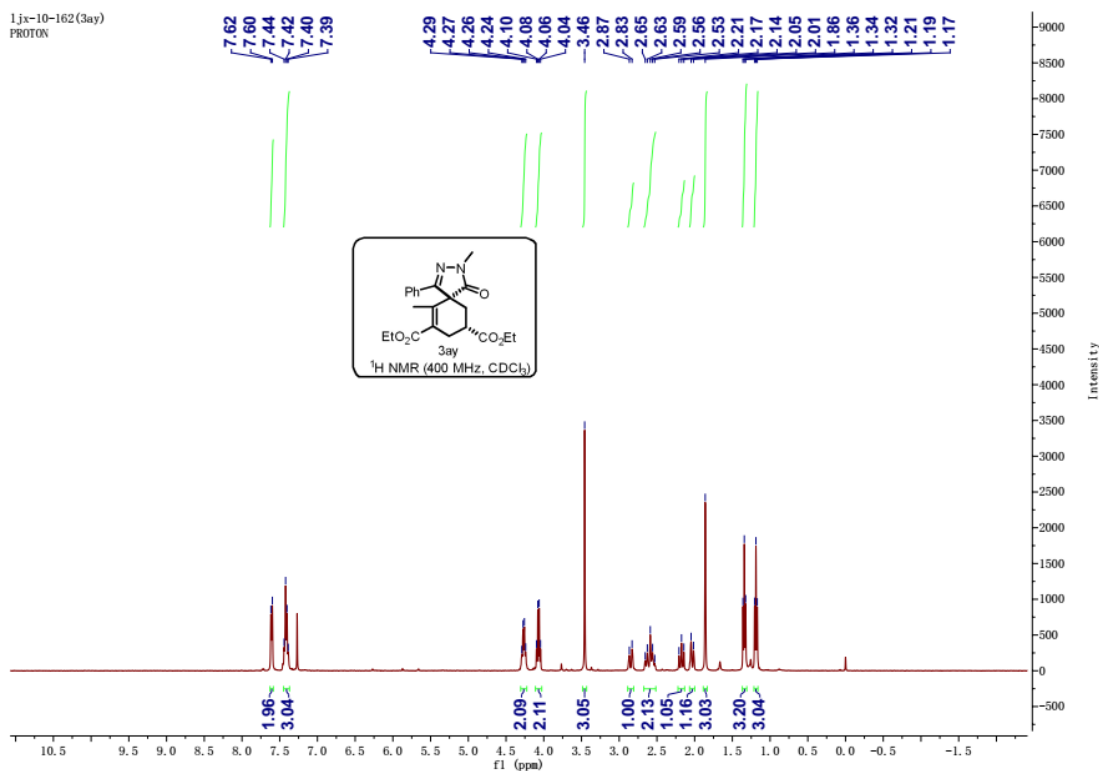

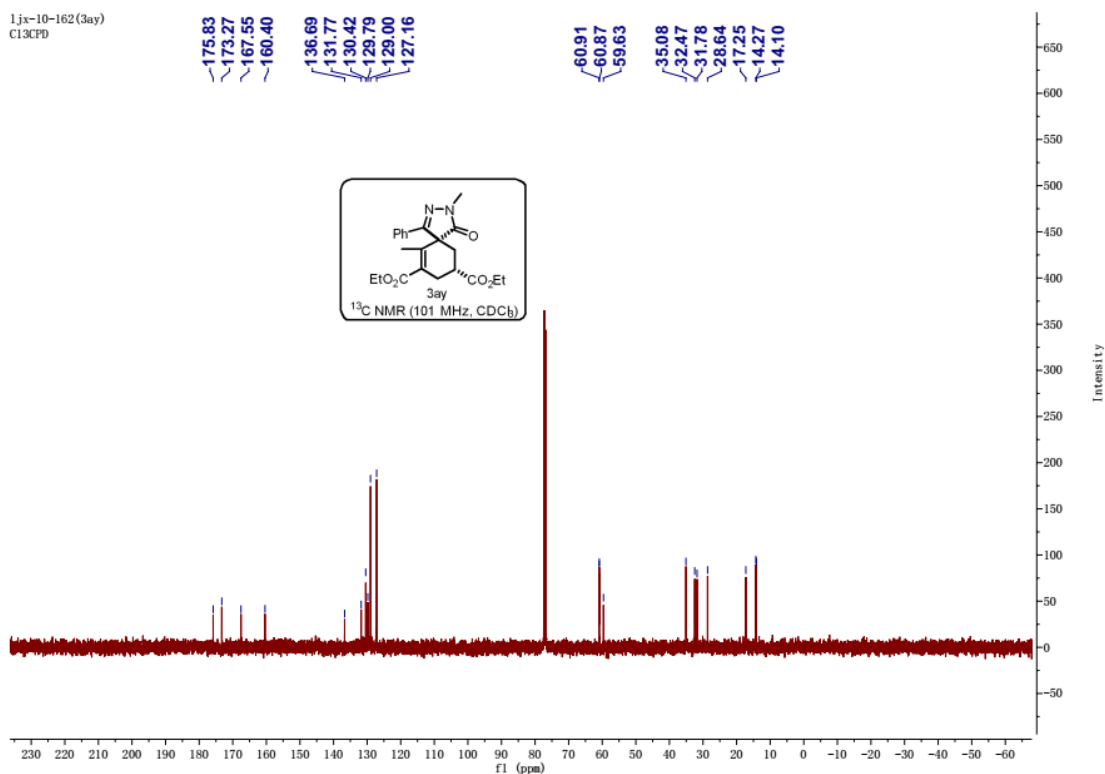

## 8. X-Ray Crystallography Data of **3ar**

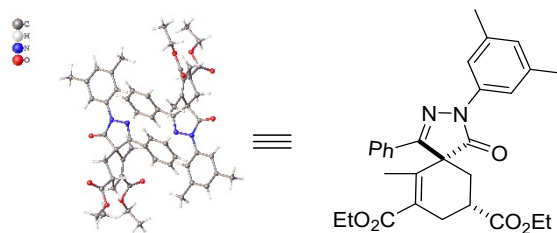

Figure S2. ORTEP diagram of **3ar**. (CCDC: 2208910) Thermal ellipsoids are shown at the 50% probability level. A colorless block crystal of **3ar** for X-ray diffraction was obtained by slowly volatilizing a solution of **3ar** in hexane/ ethyl acetate (5:1). The X-ray intensity data was measured on a Rigaku 007 Saturn 70 single crystal diffractometer.

**Table S2 Crystal data and structure refinement for **3ar**.**

| Identification code | 3ar                                                           |
|---------------------|---------------------------------------------------------------|
| Empirical formula   | C <sub>29</sub> H <sub>32</sub> N <sub>2</sub> O <sub>5</sub> |
| Formula weight      | 488.56                                                        |
| Temperature/K       | 113.15                                                        |
| Crystal system      | triclinic                                                     |
| Space group         | P-1                                                           |
| a/Å                 | 11.4759(4)                                                    |
| b/Å                 | 11.5363(3)                                                    |
| c/Å                 | 19.7187(7)                                                    |
| α/°                 | 85.779(3)                                                     |
| β/°                 | 79.152(3)                                                     |

---

|                                                |                                                                |
|------------------------------------------------|----------------------------------------------------------------|
| $\gamma/^\circ$                                | 85.444(3)                                                      |
| Volume/ $\text{\AA}^3$                         | 2551.20(15)                                                    |
| Z                                              | 4                                                              |
| $\rho_{\text{calc}}/\text{cm}^3$               | 1.272                                                          |
| $\mu/\text{mm}^{-1}$                           | 0.087                                                          |
| F(000)                                         | 1040.0                                                         |
| Crystal size/ $\text{mm}^3$                    | $0.24 \times 0.22 \times 0.15$                                 |
| Radiation                                      | Mo K $\alpha$ ( $\lambda = 0.71073$ )                          |
| 2 $\Theta$ range for data collection/ $^\circ$ | 3.548 to 52.744                                                |
| Index ranges                                   | $-14 \leq h \leq 14, -14 \leq k \leq 14, -24 \leq l \leq 24$   |
| Reflections collected                          | 27119                                                          |
| Independent reflections                        | 10440 [ $R_{\text{int}} = 0.0364, R_{\text{sigma}} = 0.0420$ ] |
| Data/restraints/parameters                     | 10440/0/660                                                    |
| Goodness-of-fit on $F^2$                       | 1.038                                                          |
| Final R indexes [ $I \geq 2\sigma(I)$ ]        | $R_1 = 0.0473, wR_2 = 0.1214$                                  |
| Final R indexes [all data]                     | $R_1 = 0.0651, wR_2 = 0.1343$                                  |
| Largest diff. peak/hole / $e \text{\AA}^{-3}$  | 0.38/-0.24                                                     |

---

## 9. References

- [1] L. Li, L. Ma, X. Wang, J. Liu, *J. Heterocyclic Chem.* **2013**, *50*,164.  
 [2] J.-X. Lai, Y. Huang, *Chem. Commun.*, **2023**, *59*, 13215.
